# Supplementary material
Source: PubMed Central journal article supplement (PMC7370695)
Supplement: NIHMS1608405-supplement-Smith_Jnccn_suppl.pdf [file NIHMS1608405-supplement-Smith_Jnccn_suppl.pdf]

Supplemental online content for:

## Financial Burdens of Cancer Treatment: A Systematic Review of Risk Factors and Outcomes

Grace L. Smith, MD, PhD, MPH; Maria A. Lopez-Olivo, MD, PhD; Pragati G. Advani, MD, DrPH; Matthew S. Ning, MD; Yimin Geng, MS, MSLIS; Sharon H. Giordano, MD, MPH; and Robert J. Volk, PhD

*J Natl Compr Canc Netw* 2019;17(10):1184–1192

**eFigure 1:** Search Strategy for MEDLINE (Ovid)

**eTable 1:** Quality Assessment: Assessing Risk of Bias of Individual Studies

**eTable 2:** Study and Patient Characteristics and Measures of Financial Toxicity Burdens

**eTable 3:** Strength of Evidence Assessment Using GRADE Criteria

**eTable 4:** Risk Factors of Financial Toxicity Burdens

**eTable 5:** Financial Toxicity Burdens and Health Outcomes

**eAppendix 1:** Supplementary Results

|    |                                                                                                                        |
|----|------------------------------------------------------------------------------------------------------------------------|
| 1  | exp *Health Expenditures/                                                                                              |
| 2  | exp *Health Care Costs/                                                                                                |
| 3  | exp *"Cost of Illness"/                                                                                                |
| 4  | exp Financing, Personal/                                                                                               |
| 5  | *Fees/ and Charges/sn [Statistics & Numerical Data]                                                                    |
| 6  | (Economic adj (bankruptcy or Insolvency or hardship or burden or stress or distress or difficult*)).ti,ab,kf.          |
| 7  | ("out of pocket" or cost or cost* or expenditure* or expense or expenses or spending*) adj15 cancer).tw,kf.            |
| 8  | treatment costs.ti,ab.                                                                                                 |
| 9  | Financial.ti,ab,kf.                                                                                                    |
| 10 | or/1-9                                                                                                                 |
| 11 | exp *Neoplasms/ or Neoplasms/ec [Economics]                                                                            |
| 12 | (cancer* or neoplas* or tumor?r* or leuk?emia* or lymphoma* or malignan* or oncolog* or "Cell Transplantation").ti,kf. |
| 13 | 11 or 12                                                                                                               |
| 14 | limit 13 to english language                                                                                           |
| 15 | 10 and 14                                                                                                              |
| 16 | (cancer and treatment and decision*).ti. and 15                                                                        |
| 17 | exp Health Care Costs/sn [Statistics & Numerical Data]                                                                 |
| 18 | exp *"Cost Sharing"/                                                                                                   |
| 19 | exp *Financing, Personal/ec, sn [Economics, Statistics & Numerical Data]                                               |
| 20 | exp *Health Expenditures/ec, sn [Economics, Statistics & Numerical Data]                                               |
| 21 | 6 or 9 or 17 or 18 or 19 or 20                                                                                         |
| 22 | 15 and 21                                                                                                              |
| 23 | 22 and 12                                                                                                              |
| 24 | ((medical or health) adj expenditure*).ti.                                                                             |
| 25 | Financial.ti.                                                                                                          |
| 26 | out-of-pocket.ti.                                                                                                      |
| 27 | (Economic adj (bankruptcy or Insolvency or hardship or burden or stress or distress or difficult*)).ti.                |
| 28 | or/24-27                                                                                                               |
| 29 | 13 and 28                                                                                                              |
| 30 | limit 29 to english language                                                                                           |
| 31 | *Health Behavior/                                                                                                      |
| 32 | exp patient compliance/ or patient dropouts/ or exp treatment refusal/                                                 |
| 33 | *Stress, Psychological/                                                                                                |
| 34 | exp *Adaptation, Psychological/                                                                                        |
| 35 | exp self efficacy/ or "self efficacy".tw,kf.                                                                           |
| 36 | exp *Anxiety/                                                                                                          |
| 37 | (coping or adaptive or adaptation).tw,kf.                                                                              |
| 38 | (distress or distresses or stress or stresses).tw,kf.                                                                  |
| 39 | (patient* adj3 ("non compliance" or "non-adherence" or noncompliance or nonadherence)).tw,kf.                          |
| 40 | exp "Patient Acceptance of Health Care"/                                                                               |
| 41 | exp Withholding Treatment/                                                                                             |
| 42 | *Medication Adherence/sn [Statistics & Numerical Data]                                                                 |
| 43 | (cancer and treatment and decision*).ti.                                                                               |
| 44 | *Decision Making/                                                                                                      |
| 45 | ((delay* or forgo*) adj3 (care or treatment)).tw,kf.                                                                   |

(continued on next page)

**eFigure 1.** Search strategy for MEDLINE (Ovid).

```

46 | or/31-45
47 | 23 and 46
48 | remove duplicates from 47
49 | exp Survival Rate/
50 | exp *Survival Analysis/
51 | survival.ti.
52 | exp *Mortality/sn, td [Statistics & Numerical Data, Trends]
53 | exp *"Quality of Life"/
54 | "Quality of Life".ti,kf.
55 | or/49-54
56 | 23 and 55
57 | remove duplicates from 56
58 | 57 not 48
59 | exp *insurance, health/
60 | *Insurance Coverage/
61 | exp *Income/
62 | Insurance Carriers/
63 | exp *Socioeconomic Factors/
64 | exp *Demography/
65 | exp "Social Determinants of Health"/
66 | exp *Neoplasms/ec [Economics]
67 | exp *Drug Therapy/ec [Economics]
68 | exp *Antineoplastic Agents/ec [Economics]
69 | exp *Specialties, Surgical/ec [Economics]
70 | Therapeutics/ec [Economics]
71 | exp *Comorbidity/
72 | exp *Radiotherapy/ec [Economics]
73 | exp *Neoplasm Recurrence, Local/ec [Economics]
74 | Recurrence/ and Neoplasms/ and 12
75 | ec.fs.
76 | 74 and 75
77 | or/59-73,76
78 | 23 and 77
79 | 48 or 57 or 78
80 | 16 or 79 or 30
81 | remove duplicates from 80
82 | or/1-7,28
83 | "financial relationships to disclose".ab.
84 | Financial Disclosures.ab.
85 | financial conflicts of interest.ab.
86 | financial conflicts of interests.ab.
87 | financial interests.ab.
88 | financial interest.ab.
89 | 83 or 84 or 85 or 86 or 87 or 88
90 | 81 and 89
91 | 81 not 90
92 | 82 and 90
93 | 91 or 92

```

**eFigure 1.** Search strategy for MEDLINE (Ovid). (cont.)

**Table 1. Quality Assessment: Assessing Risk of Bias of Individual Studies**

| Criteria |                                                                                                                                                                                                                                                                                                                                                                                                                                                                                                                                                                                                                                                                                                                                                                                                                                                                                                                                                                                                                                                                                                                                                                                                                                                                                                                                                                       | 8. For exposures that can vary in amount or level, did the study examine different levels of the exposure as related to the outcome (eg, categories of exposure or exposure measured as a continuous variable)? | 9. Were the exposure measures (independent variables) clearly defined, valid, reliable, and implemented consistently across all study participants? | 10. Was the exposure assessed more than once over time? | 11. Were the outcome measures (dependent variables) clearly defined, valid, reliable, and implemented consistently across all study participants? | 12. Were the outcome assessors blinded to the exposure status of participants? | 13. Was loss to follow-up after the exposure <20%? | 14. Were key confounding variables measured and adjusted statistically for their impact on the relationship between exposures and outcomes? | Global rating |
|----------|-----------------------------------------------------------------------------------------------------------------------------------------------------------------------------------------------------------------------------------------------------------------------------------------------------------------------------------------------------------------------------------------------------------------------------------------------------------------------------------------------------------------------------------------------------------------------------------------------------------------------------------------------------------------------------------------------------------------------------------------------------------------------------------------------------------------------------------------------------------------------------------------------------------------------------------------------------------------------------------------------------------------------------------------------------------------------------------------------------------------------------------------------------------------------------------------------------------------------------------------------------------------------------------------------------------------------------------------------------------------------|-----------------------------------------------------------------------------------------------------------------------------------------------------------------------------------------------------------------|-----------------------------------------------------------------------------------------------------------------------------------------------------|---------------------------------------------------------|---------------------------------------------------------------------------------------------------------------------------------------------------|--------------------------------------------------------------------------------|----------------------------------------------------|---------------------------------------------------------------------------------------------------------------------------------------------|---------------|
| 1        | 4. Were all the subjects selected or recruited from the same or similar populations (including the same time period)?<br>Were inclusion and exclusion criteria for being in the study prespecified and applied uniformly to all participants?<br>5. Were a sample size justification, description, or variance and effect estimates provided?<br>6. For the analyses in this article, was the exposure measured prior to the outcomes being measured?<br>7. Was the time frame sufficient so that one could reasonably expect to see an association between exposure and outcome if it existed?<br>8. For the analyses in this article, was the exposure measured prior to the outcomes being measured?<br>9. Were the exposure measures (independent variables) clearly defined, valid, reliable, and implemented consistently across all study participants?<br>10. Was the exposure assessed more than once over time?<br>11. Were the outcome measures (dependent variables) clearly defined, valid, reliable, and implemented consistently across all study participants?<br>12. Were the outcome assessors blinded to the exposure status of participants?<br>13. Was loss to follow-up after the exposure <20%?<br>14. Were key confounding variables measured and adjusted statistically for their impact on the relationship between exposures and outcomes? | Yes                                                                                                                                                                                                             | Yes                                                                                                                                                 | Yes                                                     | Yes                                                                                                                                               | Yes                                                                            | Yes                                                | Yes                                                                                                                                         | Fair          |
| 2        | Yes                                                                                                                                                                                                                                                                                                                                                                                                                                                                                                                                                                                                                                                                                                                                                                                                                                                                                                                                                                                                                                                                                                                                                                                                                                                                                                                                                                   | Yes                                                                                                                                                                                                             | Yes                                                                                                                                                 | Yes                                                     | Yes                                                                                                                                               | Yes                                                                            | Yes                                                | Yes                                                                                                                                         | Good          |
| 3        | Yes                                                                                                                                                                                                                                                                                                                                                                                                                                                                                                                                                                                                                                                                                                                                                                                                                                                                                                                                                                                                                                                                                                                                                                                                                                                                                                                                                                   | Yes                                                                                                                                                                                                             | Yes                                                                                                                                                 | Yes                                                     | Yes                                                                                                                                               | Yes                                                                            | Yes                                                | Yes                                                                                                                                         | Good          |
| 4        | Yes                                                                                                                                                                                                                                                                                                                                                                                                                                                                                                                                                                                                                                                                                                                                                                                                                                                                                                                                                                                                                                                                                                                                                                                                                                                                                                                                                                   | Yes                                                                                                                                                                                                             | Yes                                                                                                                                                 | Yes                                                     | Yes                                                                                                                                               | Yes                                                                            | Yes                                                | Yes                                                                                                                                         | Good          |
| 5        | Yes                                                                                                                                                                                                                                                                                                                                                                                                                                                                                                                                                                                                                                                                                                                                                                                                                                                                                                                                                                                                                                                                                                                                                                                                                                                                                                                                                                   | Yes                                                                                                                                                                                                             | Yes                                                                                                                                                 | Yes                                                     | Yes                                                                                                                                               | Yes                                                                            | Yes                                                | Yes                                                                                                                                         | Good          |
| 6        | Yes                                                                                                                                                                                                                                                                                                                                                                                                                                                                                                                                                                                                                                                                                                                                                                                                                                                                                                                                                                                                                                                                                                                                                                                                                                                                                                                                                                   | NR                                                                                                                                                                                                              | Yes                                                                                                                                                 | Yes                                                     | Yes                                                                                                                                               | Yes                                                                            | Yes                                                | Yes                                                                                                                                         | Fair          |
| 7        | Yes                                                                                                                                                                                                                                                                                                                                                                                                                                                                                                                                                                                                                                                                                                                                                                                                                                                                                                                                                                                                                                                                                                                                                                                                                                                                                                                                                                   | NR                                                                                                                                                                                                              | Yes                                                                                                                                                 | Yes                                                     | Yes                                                                                                                                               | Yes                                                                            | Yes                                                | Yes                                                                                                                                         | Good          |
| 8        | Yes                                                                                                                                                                                                                                                                                                                                                                                                                                                                                                                                                                                                                                                                                                                                                                                                                                                                                                                                                                                                                                                                                                                                                                                                                                                                                                                                                                   | Yes                                                                                                                                                                                                             | Yes                                                                                                                                                 | Yes                                                     | Yes                                                                                                                                               | Yes                                                                            | Yes                                                | Yes                                                                                                                                         | Good          |
| 9        | Yes                                                                                                                                                                                                                                                                                                                                                                                                                                                                                                                                                                                                                                                                                                                                                                                                                                                                                                                                                                                                                                                                                                                                                                                                                                                                                                                                                                   | NR                                                                                                                                                                                                              | Yes                                                                                                                                                 | Yes                                                     | Yes                                                                                                                                               | Yes                                                                            | Yes                                                | Yes                                                                                                                                         | Fair          |
| 10       | Yes                                                                                                                                                                                                                                                                                                                                                                                                                                                                                                                                                                                                                                                                                                                                                                                                                                                                                                                                                                                                                                                                                                                                                                                                                                                                                                                                                                   | NR                                                                                                                                                                                                              | Yes                                                                                                                                                 | Yes                                                     | Yes                                                                                                                                               | Yes                                                                            | Yes                                                | Yes                                                                                                                                         | Good          |
| 11       | Yes                                                                                                                                                                                                                                                                                                                                                                                                                                                                                                                                                                                                                                                                                                                                                                                                                                                                                                                                                                                                                                                                                                                                                                                                                                                                                                                                                                   | CD                                                                                                                                                                                                              | Yes                                                                                                                                                 | Yes                                                     | Yes                                                                                                                                               | Yes                                                                            | Yes                                                | Yes                                                                                                                                         | Good          |
| 12       | Yes                                                                                                                                                                                                                                                                                                                                                                                                                                                                                                                                                                                                                                                                                                                                                                                                                                                                                                                                                                                                                                                                                                                                                                                                                                                                                                                                                                   | Yes                                                                                                                                                                                                             | Yes                                                                                                                                                 | Yes                                                     | Yes                                                                                                                                               | Yes                                                                            | Yes                                                | Yes                                                                                                                                         | Good          |
| 13       | Yes                                                                                                                                                                                                                                                                                                                                                                                                                                                                                                                                                                                                                                                                                                                                                                                                                                                                                                                                                                                                                                                                                                                                                                                                                                                                                                                                                                   | Yes                                                                                                                                                                                                             | Yes                                                                                                                                                 | Yes                                                     | Yes                                                                                                                                               | Yes                                                                            | Yes                                                | Yes                                                                                                                                         | Fair          |
| 14       | Yes                                                                                                                                                                                                                                                                                                                                                                                                                                                                                                                                                                                                                                                                                                                                                                                                                                                                                                                                                                                                                                                                                                                                                                                                                                                                                                                                                                   | Yes                                                                                                                                                                                                             | Yes                                                                                                                                                 | Yes                                                     | Yes                                                                                                                                               | Yes                                                                            | Yes                                                | Yes                                                                                                                                         | Good          |
| 15       | Yes                                                                                                                                                                                                                                                                                                                                                                                                                                                                                                                                                                                                                                                                                                                                                                                                                                                                                                                                                                                                                                                                                                                                                                                                                                                                                                                                                                   | Yes                                                                                                                                                                                                             | Yes                                                                                                                                                 | Yes                                                     | Yes                                                                                                                                               | Yes                                                                            | Yes                                                | Yes                                                                                                                                         | Fair          |
| 16       | Yes                                                                                                                                                                                                                                                                                                                                                                                                                                                                                                                                                                                                                                                                                                                                                                                                                                                                                                                                                                                                                                                                                                                                                                                                                                                                                                                                                                   | Yes                                                                                                                                                                                                             | Yes                                                                                                                                                 | Yes                                                     | Yes                                                                                                                                               | Yes                                                                            | Yes                                                | Yes                                                                                                                                         | Fair          |
| 17       | Yes                                                                                                                                                                                                                                                                                                                                                                                                                                                                                                                                                                                                                                                                                                                                                                                                                                                                                                                                                                                                                                                                                                                                                                                                                                                                                                                                                                   | Yes                                                                                                                                                                                                             | Yes                                                                                                                                                 | Yes                                                     | Yes                                                                                                                                               | Yes                                                                            | Yes                                                | Yes                                                                                                                                         | Good          |
| 18       | Yes                                                                                                                                                                                                                                                                                                                                                                                                                                                                                                                                                                                                                                                                                                                                                                                                                                                                                                                                                                                                                                                                                                                                                                                                                                                                                                                                                                   | Yes                                                                                                                                                                                                             | Yes                                                                                                                                                 | Yes                                                     | Yes                                                                                                                                               | Yes                                                                            | Yes                                                | Yes                                                                                                                                         | Good          |
| 19       | Yes                                                                                                                                                                                                                                                                                                                                                                                                                                                                                                                                                                                                                                                                                                                                                                                                                                                                                                                                                                                                                                                                                                                                                                                                                                                                                                                                                                   | NR                                                                                                                                                                                                              | No                                                                                                                                                  | Yes                                                     | Yes                                                                                                                                               | Yes                                                                            | Yes                                                | Yes                                                                                                                                         | Fair          |
| 20       | Yes                                                                                                                                                                                                                                                                                                                                                                                                                                                                                                                                                                                                                                                                                                                                                                                                                                                                                                                                                                                                                                                                                                                                                                                                                                                                                                                                                                   | Yes                                                                                                                                                                                                             | Yes                                                                                                                                                 | Yes                                                     | Yes                                                                                                                                               | Yes                                                                            | Yes                                                | Yes                                                                                                                                         | Good          |
| 21       | Yes                                                                                                                                                                                                                                                                                                                                                                                                                                                                                                                                                                                                                                                                                                                                                                                                                                                                                                                                                                                                                                                                                                                                                                                                                                                                                                                                                                   | No                                                                                                                                                                                                              | Yes                                                                                                                                                 | Yes                                                     | Yes                                                                                                                                               | Yes                                                                            | Yes                                                | Yes                                                                                                                                         | Fair          |
| 22       | Yes                                                                                                                                                                                                                                                                                                                                                                                                                                                                                                                                                                                                                                                                                                                                                                                                                                                                                                                                                                                                                                                                                                                                                                                                                                                                                                                                                                   | Yes                                                                                                                                                                                                             | Yes                                                                                                                                                 | Yes                                                     | Yes                                                                                                                                               | Yes                                                                            | Yes                                                | Yes                                                                                                                                         | Good          |
| 23       | Yes                                                                                                                                                                                                                                                                                                                                                                                                                                                                                                                                                                                                                                                                                                                                                                                                                                                                                                                                                                                                                                                                                                                                                                                                                                                                                                                                                                   | Yes                                                                                                                                                                                                             | Yes                                                                                                                                                 | Yes                                                     | Yes                                                                                                                                               | Yes                                                                            | Yes                                                | Yes                                                                                                                                         | Good          |

(continued on next page)

Abbreviations: CD, cannot determine; NA, not applicable; NR, not reported.

**eTable 1. Quality Assessment: Assessing Risk of Bias of Individual Studies (cont.)**

| Criteria |                                                                                                                                                                                                                                            | 8. For exposures that can vary in amount or level, did the study examine different levels of the exposure as related to the outcome (eg, categories of exposure or exposure measured as a continuous variable)? | 9. Were the exposure measures (independent variables) clearly defined, valid, reliable, and implemented consistently across all study participants? | 10. Was the exposure assessed more than once over time? | 11. Were the outcome measures (dependent variables) clearly defined, valid, reliable, and implemented consistently across all study participants? | 12. Were the outcome assessors blinded to the exposure status of participants? | 13. Was loss to follow-up after baseline and ≤20%? | 14. Were key potential confounding variables measured and adjusted statistically for their impact on the relationship between exposures and outcomes? Global rating |      |
|----------|--------------------------------------------------------------------------------------------------------------------------------------------------------------------------------------------------------------------------------------------|-----------------------------------------------------------------------------------------------------------------------------------------------------------------------------------------------------------------|-----------------------------------------------------------------------------------------------------------------------------------------------------|---------------------------------------------------------|---------------------------------------------------------------------------------------------------------------------------------------------------|--------------------------------------------------------------------------------|----------------------------------------------------|---------------------------------------------------------------------------------------------------------------------------------------------------------------------|------|
| 24       | 4. Were all the subjects selected or recruited from the same or similar populations (including the same time period)? Were inclusion and exclusion criteria for being in the study prespecified and applied uniformly to all participants? | Yes                                                                                                                                                                                                             | Yes                                                                                                                                                 | Yes                                                     | Yes                                                                                                                                               | NR                                                                             | NA                                                 | Yes                                                                                                                                                                 | Good |
| 25       | 4. Were all the subjects selected or recruited from the same or similar populations (including the same time period)? Were inclusion and exclusion criteria for being in the study prespecified and applied uniformly to all participants? | Yes                                                                                                                                                                                                             | Yes                                                                                                                                                 | Yes                                                     | Yes                                                                                                                                               | NR                                                                             | NA                                                 | Yes                                                                                                                                                                 | Fair |
| 26       | 4. Were all the subjects selected or recruited from the same or similar populations (including the same time period)? Were inclusion and exclusion criteria for being in the study prespecified and applied uniformly to all participants? | Yes                                                                                                                                                                                                             | Yes                                                                                                                                                 | Yes                                                     | Yes                                                                                                                                               | NR                                                                             | NA                                                 | Yes                                                                                                                                                                 | Good |
| 27       | 4. Were all the subjects selected or recruited from the same or similar populations (including the same time period)? Were inclusion and exclusion criteria for being in the study prespecified and applied uniformly to all participants? | Yes                                                                                                                                                                                                             | No                                                                                                                                                  | Yes                                                     | Yes                                                                                                                                               | NR                                                                             | NA                                                 | Yes                                                                                                                                                                 | Good |
| 28       | 4. Were all the subjects selected or recruited from the same or similar populations (including the same time period)? Were inclusion and exclusion criteria for being in the study prespecified and applied uniformly to all participants? | Yes                                                                                                                                                                                                             | Yes                                                                                                                                                 | Yes                                                     | Yes                                                                                                                                               | NR                                                                             | NA                                                 | Yes                                                                                                                                                                 | Fair |
| 29       | 4. Were all the subjects selected or recruited from the same or similar populations (including the same time period)? Were inclusion and exclusion criteria for being in the study prespecified and applied uniformly to all participants? | Yes                                                                                                                                                                                                             | Yes                                                                                                                                                 | Yes                                                     | Yes                                                                                                                                               | NR                                                                             | NA                                                 | Yes                                                                                                                                                                 | Good |
| 30       | 4. Were all the subjects selected or recruited from the same or similar populations (including the same time period)? Were inclusion and exclusion criteria for being in the study prespecified and applied uniformly to all participants? | Yes                                                                                                                                                                                                             | Yes                                                                                                                                                 | Yes                                                     | Yes                                                                                                                                               | NR                                                                             | NA                                                 | Yes                                                                                                                                                                 | Good |
| 31       | 4. Were all the subjects selected or recruited from the same or similar populations (including the same time period)? Were inclusion and exclusion criteria for being in the study prespecified and applied uniformly to all participants? | No                                                                                                                                                                                                              | Yes                                                                                                                                                 | Yes                                                     | Yes                                                                                                                                               | NR                                                                             | NA                                                 | Yes                                                                                                                                                                 | Fair |
| 32       | 4. Were all the subjects selected or recruited from the same or similar populations (including the same time period)? Were inclusion and exclusion criteria for being in the study prespecified and applied uniformly to all participants? | Yes                                                                                                                                                                                                             | Yes                                                                                                                                                 | Yes                                                     | Yes                                                                                                                                               | NR                                                                             | NA                                                 | Yes                                                                                                                                                                 | Good |
| 33       | 4. Were all the subjects selected or recruited from the same or similar populations (including the same time period)? Were inclusion and exclusion criteria for being in the study prespecified and applied uniformly to all participants? | Yes                                                                                                                                                                                                             | Yes                                                                                                                                                 | Yes                                                     | Yes                                                                                                                                               | NR                                                                             | NA                                                 | Yes                                                                                                                                                                 | Good |
| 34       | 4. Were all the subjects selected or recruited from the same or similar populations (including the same time period)? Were inclusion and exclusion criteria for being in the study prespecified and applied uniformly to all participants? | Yes                                                                                                                                                                                                             | Yes                                                                                                                                                 | Yes                                                     | Yes                                                                                                                                               | No                                                                             | NR                                                 | Yes                                                                                                                                                                 | Good |
| 35       | 4. Were all the subjects selected or recruited from the same or similar populations (including the same time period)? Were inclusion and exclusion criteria for being in the study prespecified and applied uniformly to all participants? | Yes                                                                                                                                                                                                             | Yes                                                                                                                                                 | Yes                                                     | Yes                                                                                                                                               | NR                                                                             | NA                                                 | Yes                                                                                                                                                                 | Good |
| 36       | 4. Were all the subjects selected or recruited from the same or similar populations (including the same time period)? Were inclusion and exclusion criteria for being in the study prespecified and applied uniformly to all participants? | Yes                                                                                                                                                                                                             | Yes                                                                                                                                                 | Yes                                                     | Yes                                                                                                                                               | NR                                                                             | NR                                                 | Yes                                                                                                                                                                 | Good |
| 37       | 4. Were all the subjects selected or recruited from the same or similar populations (including the same time period)? Were inclusion and exclusion criteria for being in the study prespecified and applied uniformly to all participants? | Yes                                                                                                                                                                                                             | Yes                                                                                                                                                 | Yes                                                     | Yes                                                                                                                                               | NR                                                                             | NA                                                 | Yes                                                                                                                                                                 | Fair |
| 38       | 4. Were all the subjects selected or recruited from the same or similar populations (including the same time period)? Were inclusion and exclusion criteria for being in the study prespecified and applied uniformly to all participants? | No                                                                                                                                                                                                              | NR                                                                                                                                                  | Yes                                                     | Yes                                                                                                                                               | NR                                                                             | NA                                                 | Yes                                                                                                                                                                 | Fair |
| 39       | 4. Were all the subjects selected or recruited from the same or similar populations (including the same time period)? Were inclusion and exclusion criteria for being in the study prespecified and applied uniformly to all participants? | Yes                                                                                                                                                                                                             | Yes                                                                                                                                                 | Yes                                                     | Yes                                                                                                                                               | NR                                                                             | NA                                                 | Yes                                                                                                                                                                 | Good |
| 40       | 4. Were all the subjects selected or recruited from the same or similar populations (including the same time period)? Were inclusion and exclusion criteria for being in the study prespecified and applied uniformly to all participants? | Yes                                                                                                                                                                                                             | Yes                                                                                                                                                 | Yes                                                     | Yes                                                                                                                                               | NR                                                                             | NA                                                 | Yes                                                                                                                                                                 | Good |
| 41       | 4. Were all the subjects selected or recruited from the same or similar populations (including the same time period)? Were inclusion and exclusion criteria for being in the study prespecified and applied uniformly to all participants? | Yes                                                                                                                                                                                                             | Yes                                                                                                                                                 | Yes                                                     | Yes                                                                                                                                               | NR                                                                             | NA                                                 | Yes                                                                                                                                                                 | Good |
| 42       | 4. Were all the subjects selected or recruited from the same or similar populations (including the same time period)? Were inclusion and exclusion criteria for being in the study prespecified and applied uniformly to all participants? | Yes                                                                                                                                                                                                             | Yes                                                                                                                                                 | Yes                                                     | Yes                                                                                                                                               | NR                                                                             | No                                                 | Yes                                                                                                                                                                 | Good |
| 43       | 4. Were all the subjects selected or recruited from the same or similar populations (including the same time period)? Were inclusion and exclusion criteria for being in the study prespecified and applied uniformly to all participants? | Yes                                                                                                                                                                                                             | Yes                                                                                                                                                 | Yes                                                     | Yes                                                                                                                                               | NR                                                                             | No                                                 | Yes                                                                                                                                                                 | Good |
| 44       | 4. Were all the subjects selected or recruited from the same or similar populations (including the same time period)? Were inclusion and exclusion criteria for being in the study prespecified and applied uniformly to all participants? | Yes                                                                                                                                                                                                             | Yes                                                                                                                                                 | Yes                                                     | Yes                                                                                                                                               | NR                                                                             | NA                                                 | Yes                                                                                                                                                                 | Good |
| 45       | 4. Were all the subjects selected or recruited from the same or similar populations (including the same time period)? Were inclusion and exclusion criteria for being in the study prespecified and applied uniformly to all participants? | Yes                                                                                                                                                                                                             | No                                                                                                                                                  | Yes                                                     | Yes                                                                                                                                               | NR                                                                             | NA                                                 | Yes                                                                                                                                                                 | Fair |
| 46       | 4. Were all the subjects selected or recruited from the same or similar populations (including the same time period)? Were inclusion and exclusion criteria for being in the study prespecified and applied uniformly to all participants? | Yes                                                                                                                                                                                                             | Yes                                                                                                                                                 | Yes                                                     | Yes                                                                                                                                               | NR                                                                             | NA                                                 | Yes                                                                                                                                                                 | Good |

(continued on next page)

Abbreviations: CD, cannot determine; NA, not applicable; NR, not reported.

**eTable 1. Quality Assessment: Assessing Risk of Bias of Individual Studies (cont.)**

| Criteria |     | 4. Were all the subjects selected or recruited from the same or similar populations (including the same time period)? Were inclusion and exclusion criteria for being in the study prespecified and applied uniformly to all participants? | 5. Were a sample size justification, description, or variance and effect estimates provided? | 6. For the analyses in this article, was the exposure of interest measured prior to the outcomes being measured? | 7. Was the time frame sufficient so that one could reasonably expect to see an association between exposure and outcome if it existed? | 8. For exposures that can vary in amount or level, did the study examine levels of the exposure as related to the outcome (eg, categories of exposure or exposure measured as a continuous variable)? | 9. Were the exposure measures (independent variables) clearly defined, valid, reliable, and implemented consistently across all study participants? | 10. Was the exposure assessed more than once over time? | 11. Were the outcome measures (dependent variables) clearly defined, valid, reliable, and implemented consistently across all study participants? | 12. Were the outcome assessors blinded to the exposure status of participants? | 13. Was loss to follow-up after baseline $\leq 20\%$ ? | 14. Were key potential confounding variables measured and adjusted statistically for their impact on the relationship between exposures and outcomes? | Global rating |
|----------|-----|--------------------------------------------------------------------------------------------------------------------------------------------------------------------------------------------------------------------------------------------|----------------------------------------------------------------------------------------------|------------------------------------------------------------------------------------------------------------------|----------------------------------------------------------------------------------------------------------------------------------------|-------------------------------------------------------------------------------------------------------------------------------------------------------------------------------------------------------|-----------------------------------------------------------------------------------------------------------------------------------------------------|---------------------------------------------------------|---------------------------------------------------------------------------------------------------------------------------------------------------|--------------------------------------------------------------------------------|--------------------------------------------------------|-------------------------------------------------------------------------------------------------------------------------------------------------------|---------------|
| 47       | Yes | Yes                                                                                                                                                                                                                                        | Yes                                                                                          | NA                                                                                                               | Yes                                                                                                                                    | Yes                                                                                                                                                                                                   | Yes                                                                                                                                                 | No                                                      | Yes                                                                                                                                               | NR                                                                             | NA                                                     | Yes                                                                                                                                                   | Good          |
| 48       | Yes | Yes                                                                                                                                                                                                                                        | Yes                                                                                          | NA                                                                                                               | Yes                                                                                                                                    | Yes                                                                                                                                                                                                   | Yes                                                                                                                                                 | No                                                      | Yes                                                                                                                                               | NR                                                                             | NA                                                     | No                                                                                                                                                    | Good          |
| 49       | Yes | Yes                                                                                                                                                                                                                                        | Yes                                                                                          | Yes                                                                                                              | Yes                                                                                                                                    | Yes                                                                                                                                                                                                   | Yes                                                                                                                                                 | Yes                                                     | Yes                                                                                                                                               | NR                                                                             | No                                                     | No                                                                                                                                                    | Fair          |
| 50       | Yes | Yes                                                                                                                                                                                                                                        | Yes                                                                                          | Yes                                                                                                              | Yes                                                                                                                                    | Yes                                                                                                                                                                                                   | Yes                                                                                                                                                 | No                                                      | Yes                                                                                                                                               | NR                                                                             | NA                                                     | Yes                                                                                                                                                   | Good          |
| 51       | Yes | Yes                                                                                                                                                                                                                                        | Yes                                                                                          | NA                                                                                                               | Yes                                                                                                                                    | Yes                                                                                                                                                                                                   | Yes                                                                                                                                                 | No                                                      | Yes                                                                                                                                               | NR                                                                             | NA                                                     | Yes                                                                                                                                                   | Good          |
| 52       | Yes | Yes                                                                                                                                                                                                                                        | Yes                                                                                          | NA                                                                                                               | Yes                                                                                                                                    | Yes                                                                                                                                                                                                   | Yes                                                                                                                                                 | No                                                      | No                                                                                                                                                | NR                                                                             | NA                                                     | No                                                                                                                                                    | Fair          |
| 53       | Yes | Yes                                                                                                                                                                                                                                        | Yes                                                                                          | NA                                                                                                               | Yes                                                                                                                                    | Yes                                                                                                                                                                                                   | Yes                                                                                                                                                 | No                                                      | Yes                                                                                                                                               | NR                                                                             | NA                                                     | Yes                                                                                                                                                   | Good          |
| 54       | Yes | Yes                                                                                                                                                                                                                                        | Yes                                                                                          | NA                                                                                                               | Yes                                                                                                                                    | Yes                                                                                                                                                                                                   | Yes                                                                                                                                                 | No                                                      | Yes                                                                                                                                               | NR                                                                             | NA                                                     | Yes                                                                                                                                                   | Good          |
| 55       | Yes | Yes                                                                                                                                                                                                                                        | Yes                                                                                          | Yes                                                                                                              | Yes                                                                                                                                    | Yes                                                                                                                                                                                                   | Yes                                                                                                                                                 | No                                                      | Yes                                                                                                                                               | NR                                                                             | NA                                                     | Yes                                                                                                                                                   | Fair          |
| 56       | Yes | Yes                                                                                                                                                                                                                                        | Yes                                                                                          | NA                                                                                                               | Yes                                                                                                                                    | Yes                                                                                                                                                                                                   | Yes                                                                                                                                                 | No                                                      | Yes                                                                                                                                               | NR                                                                             | NA                                                     | Yes                                                                                                                                                   | Good          |
| 57       | Yes | No                                                                                                                                                                                                                                         | Yes                                                                                          | Yes                                                                                                              | Yes                                                                                                                                    | Yes                                                                                                                                                                                                   | Yes                                                                                                                                                 | Yes                                                     | Yes                                                                                                                                               | NR                                                                             | No                                                     | Yes                                                                                                                                                   | Good          |
| 58       | Yes | No                                                                                                                                                                                                                                         | Yes                                                                                          | NA                                                                                                               | Yes                                                                                                                                    | Yes                                                                                                                                                                                                   | Yes                                                                                                                                                 | No                                                      | Yes                                                                                                                                               | NR                                                                             | NA                                                     | Yes                                                                                                                                                   | Good          |
| 59       | Yes | Yes                                                                                                                                                                                                                                        | Yes                                                                                          | Yes                                                                                                              | Yes                                                                                                                                    | Yes                                                                                                                                                                                                   | Yes                                                                                                                                                 | Yes                                                     | Yes                                                                                                                                               | NR                                                                             | Yes                                                    | Yes                                                                                                                                                   | Good          |
| 60       | Yes | Yes                                                                                                                                                                                                                                        | Yes                                                                                          | Yes                                                                                                              | Yes                                                                                                                                    | Yes                                                                                                                                                                                                   | Yes                                                                                                                                                 | No                                                      | Yes                                                                                                                                               | NR                                                                             | NA                                                     | Yes                                                                                                                                                   | Good          |
| 61       | Yes | Yes                                                                                                                                                                                                                                        | Yes                                                                                          | NA                                                                                                               | Yes                                                                                                                                    | Yes                                                                                                                                                                                                   | Yes                                                                                                                                                 | No                                                      | Yes                                                                                                                                               | NR                                                                             | NA                                                     | No                                                                                                                                                    | Fair          |
| 62       | Yes | Yes                                                                                                                                                                                                                                        | Yes                                                                                          | Yes                                                                                                              | Yes                                                                                                                                    | Yes                                                                                                                                                                                                   | Yes                                                                                                                                                 | No                                                      | Yes                                                                                                                                               | NR                                                                             | NA                                                     | Yes                                                                                                                                                   | Good          |
| 63       | Yes | Yes                                                                                                                                                                                                                                        | Yes                                                                                          | Yes                                                                                                              | Yes                                                                                                                                    | Yes                                                                                                                                                                                                   | Yes                                                                                                                                                 | No                                                      | Yes                                                                                                                                               | NR                                                                             | NA                                                     | Yes                                                                                                                                                   | Good          |
| 64       | Yes | Yes                                                                                                                                                                                                                                        | Yes                                                                                          | NR                                                                                                               | Yes                                                                                                                                    | Yes                                                                                                                                                                                                   | Yes                                                                                                                                                 | Yes                                                     | Yes                                                                                                                                               | NR                                                                             | Yes                                                    | Yes                                                                                                                                                   | Good          |
| 65       | Yes | Yes                                                                                                                                                                                                                                        | Yes                                                                                          | Yes                                                                                                              | Yes                                                                                                                                    | Yes                                                                                                                                                                                                   | Yes                                                                                                                                                 | No                                                      | Yes                                                                                                                                               | NR                                                                             | NA                                                     | Yes                                                                                                                                                   | Good          |
| 66       | Yes | No                                                                                                                                                                                                                                         | NR                                                                                           | No                                                                                                               | Yes                                                                                                                                    | Yes                                                                                                                                                                                                   | Yes                                                                                                                                                 | No                                                      | Yes                                                                                                                                               | NR                                                                             | NA                                                     | No                                                                                                                                                    | Fair          |
| 67       | Yes | Yes                                                                                                                                                                                                                                        | Yes                                                                                          | NA                                                                                                               | Yes                                                                                                                                    | Yes                                                                                                                                                                                                   | Yes                                                                                                                                                 | No                                                      | Yes                                                                                                                                               | NR                                                                             | NA                                                     | Yes                                                                                                                                                   | Good          |
| 68       | Yes | Yes                                                                                                                                                                                                                                        | Yes                                                                                          | NA                                                                                                               | Yes                                                                                                                                    | Yes                                                                                                                                                                                                   | Yes                                                                                                                                                 | No                                                      | Yes                                                                                                                                               | NR                                                                             | NA                                                     | Yes                                                                                                                                                   | Good          |
| 69       | Yes | Yes                                                                                                                                                                                                                                        | Yes                                                                                          | NA                                                                                                               | Yes                                                                                                                                    | Yes                                                                                                                                                                                                   | Yes                                                                                                                                                 | No                                                      | Yes                                                                                                                                               | NR                                                                             | NA                                                     | Yes                                                                                                                                                   | Good          |

(continued on next page)

Abbreviations: CD, cannot determine; NA, not applicable; NR, not reported.

**Table 1. Quality Assessment: Assessing Risk of Bias of Individual Studies (cont.)**

|           | Criteria                                                                                                                                                                                                                                   |                                                                                              |                                                                                                                  |                                                                                                                                        |                                                                                                                                                                                                                 |                                                                                                                                              |                                                         |                                                                                                                                                   |                                                                                |                                                            |                                                                                                                                             |               |        |         |      |  |  |
|-----------|--------------------------------------------------------------------------------------------------------------------------------------------------------------------------------------------------------------------------------------------|----------------------------------------------------------------------------------------------|------------------------------------------------------------------------------------------------------------------|----------------------------------------------------------------------------------------------------------------------------------------|-----------------------------------------------------------------------------------------------------------------------------------------------------------------------------------------------------------------|----------------------------------------------------------------------------------------------------------------------------------------------|---------------------------------------------------------|---------------------------------------------------------------------------------------------------------------------------------------------------|--------------------------------------------------------------------------------|------------------------------------------------------------|---------------------------------------------------------------------------------------------------------------------------------------------|---------------|--------|---------|------|--|--|
|           | 4. Were all the subjects selected or recruited from the same or similar populations (including the same time period)? Were inclusion and exclusion criteria for being in the study prespecified and applied uniformly to all participants? | 5. Were a sample size justification, description, or variance and effect estimates provided? | 6. For the analyses in this article, was the exposure of interest measured prior to the outcomes being measured? | 7. Was the time frame sufficient so that one could reasonably expect to see an association between exposure and outcome if it existed? | 8. For exposures that can vary in amount or level, did the study examine different levels of the exposure as related to the outcome (eg, categories of exposure or exposure measured as a continuous variable)? | 9. Were the exposure measures (independent variables) clearly defined, reliable, and implemented consistently across all study participants? | 10. Was the exposure assessed more than once over time? | 11. Were the outcome measures (dependent variables) clearly defined, valid, reliable, and implemented consistently across all study participants? | 12. Were the outcome assessors blinded to the exposure status of participants? | 13. Was loss to follow-up after the exposure $\leq 20\%$ ? | 14. Were key confounding variables measured and adjusted statistically for their impact on the relationship between exposures and outcomes? | Global rating |        |         |      |  |  |
| Reference | 1. Was the research question or objective in this article clearly stated?                                                                                                                                                                  | 2. Was the study population clearly specified and defined?                                   | 3. Was the participation rate of eligible persons at least 50%?                                                  | 4. Yes                                                                                                                                 | 5. Yes                                                                                                                                                                                                          | 6. NA                                                                                                                                        | 7. Yes                                                  | 8. Yes                                                                                                                                            | 9. Yes                                                                         | 10. No                                                     | 11. Yes                                                                                                                                     | 12. NR        | 13. NA | 14. Yes | Good |  |  |
| 70        | Yes                                                                                                                                                                                                                                        | Yes                                                                                          | Yes                                                                                                              | Yes                                                                                                                                    | Yes                                                                                                                                                                                                             | NA                                                                                                                                           | Yes                                                     | Yes                                                                                                                                               | Yes                                                                            | No                                                         | Yes                                                                                                                                         | NR            | NA     | Yes     | Good |  |  |
| 71        | Yes                                                                                                                                                                                                                                        | Yes                                                                                          | No                                                                                                               | Yes                                                                                                                                    | Yes                                                                                                                                                                                                             | NA                                                                                                                                           | Yes                                                     | Yes                                                                                                                                               | Yes                                                                            | No                                                         | Yes                                                                                                                                         | NR            | NA     | Yes     | Good |  |  |
| 72        | Yes                                                                                                                                                                                                                                        | Yes                                                                                          | Yes                                                                                                              | Yes                                                                                                                                    | Yes                                                                                                                                                                                                             | NA                                                                                                                                           | Yes                                                     | Yes                                                                                                                                               | Yes                                                                            | No                                                         | Yes                                                                                                                                         | No            | NA     | Yes     | Good |  |  |
| 73        | Yes                                                                                                                                                                                                                                        | Yes                                                                                          | Yes                                                                                                              | Yes                                                                                                                                    | No                                                                                                                                                                                                              | NA                                                                                                                                           | Yes                                                     | Yes                                                                                                                                               | Yes                                                                            | No                                                         | Yes                                                                                                                                         | NR            | NA     | No      | Fair |  |  |
| 74        | Yes                                                                                                                                                                                                                                        | Yes                                                                                          | Yes                                                                                                              | Yes                                                                                                                                    | Yes                                                                                                                                                                                                             | NA                                                                                                                                           | Yes                                                     | Yes                                                                                                                                               | Yes                                                                            | No                                                         | Yes                                                                                                                                         | NR            | NA     | Yes     | Good |  |  |

Abbreviations: CD, cannot determine; NA, not applicable; NR, not reported. (references on next page)

## eTable 1. Quality Assessment: Assessing Risk of Bias of Individual Studies (cont.)

### References

- Shankaran V, Leahy T, Steelquist J, et al. Pilot feasibility study of an oncology financial navigation program. *J Oncol Pract* 2018;14:e122-129.
- Wheeler SB, Spencer JC, Pinheiro LC, et al. Financial impact of breast cancer in black versus white women. *J Clin Oncol* 2018;36:1695-1701.
- de Souza JA, Kung S, O'Connor J, et al. Determinants of patient-centered financial stress in patients with locally advanced head and neck cancer. *J Oncol Pract* 2017;13:e310-318.
- de Souza JA, Yap BJ, Wroblewski K, et al. Measuring financial toxicity as a clinically relevant patient-reported outcome: the validation of the Comprehensive Score for financial Toxicity (COST). *Cancer* 2017;123:476-484.
- Farias AJ, Du XL. Association between out-of-pocket costs, race/ethnicity, and adjuvant endocrine therapy adherence among Medicare patients with breast cancer. *J Clin Oncol* 2017;35:86-95.
- Meeker CR, Wong YN, Egleston BL, et al. Distress and financial distress in adults with cancer: an age-based analysis. *J Natl Compr Canc Netw* 2017;15:1224-1233.
- Pisu M, Azuero A, Benz R, et al. Out-of-pocket costs and burden among rural breast cancer survivors. *Cancer Med* 2017;6:572-581.
- Abel GA, Albelda R, Khera N, et al. Financial hardship and patient-reported outcomes after hematopoietic cell transplantation. *Biol Blood Marrow Transplant* 2016;22:1504-1510.
- Banegas MP, Guy GP Jr, de Moor JS, et al. For working-age cancer survivors, medical debt and bankruptcy create financial hardships. *Health Aff (Millwood)* 2016;35:54-61.
- Chongpison Y, Hornbrook MC, Harris RB, et al. Self-reported depression and perceived financial burden among long-term rectal cancer survivors. *Psychooncology* 2016;25:1350-1356.
- Delgado-Guay MO, Chisholm G, Williams J, et al. Frequency, intensity, and correlates of spiritual pain in advanced cancer patients assessed in a supportive/palliative care clinic. *Palliat Support Care* 2016;14:341-348.
- DiMartino LD, Birken SA, Mayer DK. The relationship between cancer survivors' socioeconomic status and reports of follow-up care discussions with providers. *J Cancer Educ* 2017;32:749-755.
- Farias AJ, Hansen RN, Zeliadt SB, et al. The association between out-of-pocket costs and adherence to adjuvant endocrine therapy among newly diagnosed breast cancer patients. *Am J Clin Oncol* 2018;41:708-715.
- Kale HP, Carroll NV. Self-reported financial burden of cancer care and its effect on physical and mental health-related quality of life among US cancer survivors. *Cancer* 2016;122:283-289.
- Keim-Malpass J, Levine B, Danhauer SC, et al. Work-related perceptions and quality of life among breast cancer survivors. *Psychooncology* 2016;25:873-876.
- Lathan CS, Cronin A, Tucker-Seeley R, et al. Association of financial strain with symptom burden and quality of life for patients with lung or colorectal cancer. *J Clin Oncol* 2016;34:1732-1740.
- Lee M, Khan MM. Gender differences in cost-related medication non-adherence among cancer survivors. *J Cancer Surviv* 2016;10:384-393.
- Lee M, Salloum RG. Racial and ethnic disparities in cost-related medication non-adherence among cancer survivors. *J Cancer Surviv* 2016;10:534-544.
- Meeker CR, Geynisman DM, Egleston BL, et al. Relationships among financial distress, emotional distress, and overall distress in insured patients with cancer. *J Oncol Pract* 2016;12:e755-764.
- Narang AK, Nicholas LH. Out-of-pocket spending and financial burden among Medicare beneficiaries with cancer. *JAMA Oncol* 2017;3:757-765.
- Nipp RD, Zullig LL, Samsa G, et al. Identifying cancer patients who alter care or lifestyle due to treatment-related financial distress. *Psychooncology* 2016;25:719-725.
- Ramsey SD, Bansal A, Fedorenko CR, et al. Financial insolvency as a risk factor for early mortality among patients with cancer. *J Clin Oncol* 2016;34:980-986.
- Whitney RL, Bell JF, Reed SC, et al. Predictors of financial difficulties and work modifications among cancer survivors in the United States. *J Cancer Surviv* 2016;10:241-250.
- Wong YN, Schluchter MD, Albrecht TL, et al. Financial concerns about participation in clinical trials among patients with cancer. *J Clin Oncol* 2016;34:479-487.
- Yabroff KR, Dowling EC, Guy GP Jr, et al. Financial hardship associated with cancer in the United States: findings from a population-based sample of adult cancer survivors. *J Clin Oncol* 2016;34:259-267.
- Zheng Z, Yabroff KR, Guy GP Jr, et al. Annual medical expenditure and productivity loss among colorectal, female breast, and prostate cancer survivors in the United States. *J Natl Cancer Inst* 2015;108:cjv382.
- Callahan C, Brintzenhofesoc K. Financial quality of life for patients with cancer: an exploratory study. *J Psychosoc Oncol* 2015;33:377-394.
- Delgado-Guay M, Ferrer J, Rieber AG, et al. Financial distress and its associations with physical and emotional symptoms and quality of life among advanced cancer patients. *Oncologist* 2015;20:1092-1098.
- Guy GP Jr, Yabroff KR, Ekwueme DU, et al. Healthcare expenditure burden among non-elderly cancer survivors, 2008-2012. *Am J Prev Med* 2015;49(Suppl 5):S489-497.
- Huntington SF, Weiss BM, Vogl DT, et al. Financial toxicity in insured patients with multiple myeloma: a cross-sectional pilot study. *Lancet Haematol* 2015;2:e408-416.
- Jones WC, Parry C, Devine S, et al. Prevalence and predictors of distress in posttreatment adult leukemia and lymphoma survivors. *J Psychosoc Oncol* 2015;33:124-141.
- Palmer NR, Weaver KE, Hauser SP, et al. Disparities in barriers to follow-up care between African American and White breast cancer survivors. *Support Care Cancer* 2015;23:3201-3209.
- Pisu M, Kenzik KM, Oster RA, et al. Economic hardship of minority and non-minority cancer survivors 1 year after diagnosis: another long-term effect of cancer? *Cancer* 2015;121:1257-1264.
- Tucker-Seeley RD, Abel GA, Uno H, et al. Financial hardship and the intensity of medical care received near death. *Psychooncology* 2015;24:572-578.
- Zafar SY, McNeil RB, Thomas CM, et al. Population-based assessment of cancer survivors' financial burden and quality of life: a prospective cohort study. *J Oncol Pract* 2015;11:145-150.
- Bender CM, Gentry AL, Brufsky AM, et al. Influence of patient and treatment factors on adherence to adjuvant endocrine therapy in breast cancer. *Oncol Nurs Forum* 2014;41:274-285.
- Bestvina CM, Zullig LL, Rushing C, et al. Patient-oncologist cost communication, financial distress, and medication adherence. *J Oncol Pract* 2014;10:162-167.
- de Souza JA, Yap BJ, Hlubocky FJ, et al. The development of a financial toxicity patient-reported outcome in cancer: the COST measure. *Cancer* 2014;120:3245-3253.
- Dusetzina SB, Winn AN, Abel GA, et al. Cost sharing and adherence to tyrosine kinase inhibitors for patients with chronic myeloid leukemia. *J Clin Oncol* 2014;32:306-311.
- Ekwueme DU, Yabroff KR, Guy GP Jr, et al. Medical costs and productivity losses of cancer survivors—United States, 2008-2011. *MMWR Morb Mortal Wkly Rep* 2014;63:505-510.
- Fenn KM, Evans SB, McCormick R, et al. Impact of financial burden of cancer on survivors' quality of life. *J Oncol Pract* 2014;10:332-338.
- Jagsi R, Hawley ST, Abrahamse P, et al. Impact of adjuvant chemotherapy on long-term employment of survivors of early-stage breast cancer. *Cancer* 2014;120:1854-1862.
- Jagsi R, Pottow JAE, Griffith KA, et al. Long-term financial burden of breast cancer: experiences of a diverse cohort of survivors identified through population-based registries. *J Clin Oncol* 2014;32:1269-1276.



**eTable 1. Quality Assessment: Assessing Risk of Bias of Individual Studies (cont.)**

44. Khera N, Chang YH, Hashmi S, et al. Financial burden in recipients of allogeneic hematopoietic cell transplantation. *Biol Blood Marrow Transplant* 2014;20:1375–1381.
45. Kircher SM, Johansen ME, Nimeiri HS, et al. Impact of Medicare Part D on out-of-pocket drug costs and medical use for patients with cancer. *Cancer* 2014;120:3378–3384.
46. Martin MY, Fouad MN, Oster RA, et al. What do cancer patients worry about when making decisions about treatment? Variation across racial/ethnic groups. *Support Care Cancer* 2014;22:233–244.
47. Regenbogen SE, Veenstra CM, Hawley ST, et al. The personal financial burden of complications after colorectal cancer surgery. *Cancer* 2014;120:3074–3081.
48. Veenstra CM, Regenbogen SE, Hawley ST, et al. A composite measure of personal financial burden among patients with stage III colorectal cancer. *Med Care* 2014;52:957–962.
49. Blinder V, Patil S, Eberle C, et al. Early predictors of not returning to work in low-income breast cancer survivors: a 5-year longitudinal study. *Breast Cancer Res Treat* 2013;140:407–416.
50. Davidoff AJ, Erten M, Shaffer T, et al. Out-of-pocket health care expenditure burden for Medicare beneficiaries with cancer. *Cancer* 2013;119:1257–1265.
51. Dowling EC, Chawla N, Forsythe LP, et al. Lost productivity and burden of illness in cancer survivors with and without other chronic conditions. *Cancer* 2013;119:3393–3401.
52. Goodwin JA, Coleman EA, Sullivan E, et al. Personal financial effects of multiple myeloma and its treatment. *Cancer Nurs* 2013;36:301–308.
53. Hamilton JG, Wu LM, Austin JE, et al. Economic survivorship stress is associated with poor health-related quality of life among distressed survivors of hematopoietic stem cell transplantation. *Psychooncology* 2013;22:911–921.
54. Kent EE, Forsythe LP, Yabroff KR, et al. Are survivors who report cancer-related financial problems more likely to forgo or delay medical care? *Cancer* 2013;119:3710–3717.
55. Ramsey S, Blough D, Kirchhoff A, et al. Washington State cancer patients found to be at greater risk for bankruptcy than people without a cancer diagnosis. *Health Aff (Millwood)* 2013;32:1143–1152.
56. Wan Y, Gao X, Mehta S, et al. Indirect costs associated with metastatic breast cancer. *J Med Econ* 2013;16:1169–1178.
57. Zafar SY, Peppercorn JM, Schrag D, et al. The financial toxicity of cancer treatment: a pilot study assessing out-of-pocket expenses and the insured cancer patient's experience. *Oncologist* 2013;18:381–390.
58. Zullig LL, Peppercorn JM, Schrag D, et al. Financial distress, use of cost-coping strategies, and adherence to prescription medication among patients with cancer. *J Oncol Pract* 2013;9(Suppl 6):60s–63s.
59. Meneses K, Azuero A, Hassey L, et al. Does economic burden influence quality of life in breast cancer survivors? *Gynecol Oncol* 2012;124:437–443.
60. Shankaran V, Jolly S, Blough D, et al. Risk factors for financial hardship in patients receiving adjuvant chemotherapy for colon cancer: a population-based exploratory analysis. *J Clin Oncol* 2012;30:1608–1614.
61. Bernard DSM, Farr SL, Fang Z. National estimates of out-of-pocket health care expenditure burdens among nonelderly adults with cancer: 2001 to 2008. *J Clin Oncol* 2011;29:2821–2826.
62. Streeter SB, Schwartzberg L, Hussain N, et al. Patient and plan characteristics affecting abandonment of oral oncolytic prescriptions. *Am J Manag Care* 2011;17(Suppl 5):SP38–44.
63. Neugut AI, Subar M, Wilde ET, et al. Association between prescription co-payment amount and compliance with adjuvant hormonal therapy in women with early-stage breast cancer. *J Clin Oncol* 2011;29:2534–2542.
64. de Moor JS, Partridge AH, Winer EP, et al. The role of socioeconomic status in adjustment after ductal carcinoma in situ. *Cancer* 2010;116:1218–1225.
65. Khera N, Chow EJ, Leisenring WM, et al. Factors associated with adherence to preventive care practices among hematopoietic cell transplantation survivors. *Biol Blood Marrow Transplant* 2011;17:995–1003.
66. Markman M, Luce R. Impact of the cost of cancer treatment: an internet-based survey. *J Oncol Pract* 2010;6:69–73.
67. Weaver KE, Rowland JH, Bellizzi KM, et al. Forgoing medical care because of cost: assessing disparities in healthcare access among cancer survivors living in the United States. *Cancer* 2010;116:3493–3504.
68. Pezzin LE, O'Neil MB, Nattinger AB. The economic consequences of breast cancer adjuvant hormonal treatments. *J Gen Intern Med* 2009;24(Suppl 2):S446–450.
69. Eli K, Xie B, Wells A, et al. Economic stress among low-income women with cancer: effects on quality of life. *Cancer* 2008;112:616–625.
70. Gupta D, Lis CG, Grutsch JF. Perceived cancer-related financial difficulty: implications for patient satisfaction with quality of life in advanced cancer. *Support Care Cancer* 2007;15:1051–1056.
71. Francoeur RB. Cumulative financial stress and strain in palliative radiation outpatients: the role of age and disability. *Acta Oncol* 2005;44:369–381.
72. Langa KM, Fendrick AM, Chernew ME, et al. Out-of-pocket health-care expenditures among older Americans with cancer. *Value Health* 2004;7:186–194.
73. Smith JC, Johnson JT, Cognetti DM, et al. Quality of life, functional outcome, and costs of early glottic cancer. *Laryngoscope* 2003;113:68–76.
74. Houts PS, Harvey HA, Simmonds MA, et al. Characteristics of patients at risk for financial burden because of cancer and its treatment. *J Psychosoc Oncol* 1985;3:15–22.

**eTable 2. Study and Patient Characteristics and Measures of Financial Toxicity Burdens**

| Reference                          | Study Design | Setting/Data Source (Subjects, n)                                        | Study Inclusion                                                                                                                                                                                                                              | Participant Demographic                                                                                                                                                                                                                                                           | Financial Toxicity Burden: Definition, Tool/Measure, Prevalence                                                                                                                                                                                                                                                                                                                                                                                      |
|------------------------------------|--------------|--------------------------------------------------------------------------|----------------------------------------------------------------------------------------------------------------------------------------------------------------------------------------------------------------------------------------------|-----------------------------------------------------------------------------------------------------------------------------------------------------------------------------------------------------------------------------------------------------------------------------------|------------------------------------------------------------------------------------------------------------------------------------------------------------------------------------------------------------------------------------------------------------------------------------------------------------------------------------------------------------------------------------------------------------------------------------------------------|
| Shankaran et al, 2018 <sup>1</sup> | Cohort-P     | Seattle Cancer Care Alliance (n=23)                                      | <ul style="list-style-type: none"> <li>• Age ≥18 y</li> <li>• English-speaking</li> <li>• Diagnosis of nonmetastatic cancer</li> <li>• ≤3 y since treatment</li> <li>• All sites</li> </ul>                                                  | <ul style="list-style-type: none"> <li>• Mean age, 60 y (range, 32–77 y)</li> <li>• 40% female</li> <li>• 85% white, 5% black, 5% Asian</li> <li>• 50% commercial insurance, 25% Medicare, 25% Medicaid</li> </ul>                                                                | <ul style="list-style-type: none"> <li>• Financial hardship and burden</li> <li>• Hardship: debt during treatment (55%), decreased income during treatment (55%), loans during treatment (30%)</li> <li>• Burden: "I feel that my cancer diagnosis and treatment has been a financial burden to my household"; "I feel anxious or worried about how I will manage the costs related to my cancer care"; 48% high anxiety, 42% high burden</li> </ul> |
| Wheeler et al, 2018 <sup>2</sup>   | Cohort-P     | Carolina Breast Cancer Study survey (n=2,494)                            | <ul style="list-style-type: none"> <li>• Diagnosis of incident breast cancer</li> </ul>                                                                                                                                                      | <ul style="list-style-type: none"> <li>• Mean age, 52 y</li> <li>• 51% white, 49% black</li> <li>• 74% private insurance, 6% Medicare, 14% Medicaid, 55% uninsured</li> </ul>                                                                                                     | <ul style="list-style-type: none"> <li>• Financial impact</li> <li>• Modified framework of financial impact, based on self-reported survey data at 5 mo (baseline) and 25 mo (follow-up) postdiagnosis, negative impact on OOP and indirect costs (lost insurance, lost job, financial barrier to healthcare, transportation barrier; 48%)</li> </ul>                                                                                                |
| de Souza et al, 2017 <sup>3</sup>  | Cohort-L     | University of Chicago Medicine Multidisciplinary Clinic (n=73)           | <ul style="list-style-type: none"> <li>• Diagnosis of stage III–IVb head and neck cancer</li> <li>• Receiving chemoradiation</li> <li>• ECOG 0–1</li> </ul>                                                                                  | <ul style="list-style-type: none"> <li>• Median age, 60 y (range, 26–79 y)</li> <li>• 22% female</li> <li>• 74% white</li> <li>• 55% private insurance, 26% Medicare, 19% Medicaid</li> </ul>                                                                                     | <ul style="list-style-type: none"> <li>• OOP costs</li> <li>• Financial burden: OOP costs relative to household income</li> <li>• Cost-coping: selling possessions/property, using personal savings, borrowing money and taking credit card loans, having family members work more hours to pay for cancer care; 69% used at least one cost-coping strategy</li> </ul>                                                                               |
| de Souza et al, 2017 <sup>4</sup>  | CS           | University of Chicago Medicine, North Shore University (n=233)           | <ul style="list-style-type: none"> <li>• Age ≥18 y</li> <li>• Diagnosis of stage IV cancer</li> <li>• All sites</li> </ul>                                                                                                                   | <ul style="list-style-type: none"> <li>• Median age, 59 y (range, 27–88 y)</li> <li>• 58% female</li> <li>• 66% white, 23% black, 6% Hispanic, 4% Asian/Native American</li> <li>• 62% private/employer-based insurance, 31% Medicare, 6% Medicaid</li> </ul>                     | <ul style="list-style-type: none"> <li>• Financial toxicity</li> <li>• COST tool</li> <li>• Median COST score, 23 (range, 0–44; mean±SD, 22.23±11.89); higher score = lower financial toxicity</li> </ul>                                                                                                                                                                                                                                            |
| Farias & Du, 2017 <sup>5</sup>     | CS           | SEER-Medicare database (2007–2009) with Medicare Part D claims (n=8,688) | <ul style="list-style-type: none"> <li>• Women aged ≥65 y</li> <li>• Diagnosis of stage I–III hormone receptor–positive breast cancer</li> <li>• Indicated for aromatase inhibitor therapy</li> <li>• ≥12 mo in Part A+B Medicare</li> </ul> | <ul style="list-style-type: none"> <li>• Mean age, 75±7 y (range, 65–103 y)</li> <li>• 83% non-Hispanic white, 6% black, 6% Hispanic, 5% Asian</li> <li>• 56% stage I, 34% stage II, 10% stage III</li> <li>• 60% BCS, 38% mastectomy, 21% chemotherapy, 60% radiation</li> </ul> | <ul style="list-style-type: none"> <li>• Mean OOP costs</li> <li>• 30-d supply of medication amount paid at the time prescription was filled</li> </ul>                                                                                                                                                                                                                                                                                              |

(continued on next page)

Abbreviations: AI, aromatase inhibitor; ALL, acute lymphoblastic leukemia; AML, acute myeloid leukemia; BCCTP, Breast and Cervical Cancer Treatment Program; BCEI, Breast Cancer Education Intervention; BCS, breast-conserving surgery; CanCORS, (NCI) Cancer Care Outcomes Research and Surveillance; CCC, comprehensive cancer center; CCOFWU, Comprehensive Cancer Care—Wake Forest University; CLL, chronic lymphocytic leukemia; CML, chronic myeloid leukemia; Cohort-L, cohort-longitudinal; Cohort-P, cohort-prospective; Cohort-R, cohort-retrospective; COIN, Collection of Indirect and Nonmedical Direct Costs, modified for monthly OOP costs; COST, Comprehensive Score for financial Toxicity; CRC, colorectal cancer; CRN, cost-related medication nonadherence; CS, cross-sectional; CSS, Cancer Surveillance System; DCIS, ductal carcinoma in situ; EBC, early-stage breast cancer; ECSS, Experiences With Cancer Survivorship Supplement; GPH, general public hospital; HCT, hematopoietic cell transplantation; HMO, health maintenance organization; MBC, metastatic breast cancer; MCBS, Medicare Current Beneficiary Survey; MDS/MPN, myelodysplastic syndromes/myeloproliferative neoplasms; MEPS, Medical Expenditure Panel Survey; NHIS, National Health Interview Survey; NHL, non-Hodgkin's lymphoma; OOP, out-of-pocket; POS, point of service (insurance); PPO, preferred provider organization; VA, Veterans Administration.

**Table 2. Study and Patient Characteristics and Measures of Financial Toxicity Burdens (cont.)**

| Reference                        | Study Design | Setting/Data Source (Subjects, n)                                                        | Study Inclusion                                                                                                                                                                              | Participant Demographic                                                                                                                                                                                                                                                                                                                            | Financial Toxicity Burden: Definition, Tool/Measure, Prevalence                                                                                                                                                                                                                                                                                                                                                                                                                                                                                                                                      |
|----------------------------------|--------------|------------------------------------------------------------------------------------------|----------------------------------------------------------------------------------------------------------------------------------------------------------------------------------------------|----------------------------------------------------------------------------------------------------------------------------------------------------------------------------------------------------------------------------------------------------------------------------------------------------------------------------------------------------|------------------------------------------------------------------------------------------------------------------------------------------------------------------------------------------------------------------------------------------------------------------------------------------------------------------------------------------------------------------------------------------------------------------------------------------------------------------------------------------------------------------------------------------------------------------------------------------------------|
| Meeker et al, 2017 <sup>6</sup>  | CS           | Convenience sample from NCI-designated CCC outpatient clinics (n=119)                    | <ul style="list-style-type: none"> <li>• Age ≥18 y</li> <li>• Diagnosis of cancer, at any point in treatment</li> <li>• All sites</li> </ul>                                                 | <ul style="list-style-type: none"> <li>• Median age, 62 y (range, 22–87 y)</li> <li>• 52% female</li> <li>• 84% white, 11% black</li> <li>• 100% insured</li> </ul>                                                                                                                                                                                | <ul style="list-style-type: none"> <li>• In-Charge Financial Distress/Financial Well-Being Scale</li> <li>• 8-item scale from 1 (overwhelming financial distress) to 10 (highest level of financial well-being); 22% with any financial distress</li> </ul>                                                                                                                                                                                                                                                                                                                                          |
| Pisu et al, 2017 <sup>7</sup>    | Cohort-L     | Rural Breast Cancer Survivor trial (n=432)                                               | <ul style="list-style-type: none"> <li>• Age ≥21 y</li> <li>• Diagnosis of stage 0–III breast cancer</li> <li>• ≤3 y since primary treatment</li> <li>• Resident of rural Florida</li> </ul> | <ul style="list-style-type: none"> <li>• 4% aged 35–45 y, 49% aged 46–64 y, 48% aged 65–90 y</li> <li>• 6% minority race/ethnicity</li> <li>• 94% insured</li> <li>• 66% hormonal therapy, 42% surgery, chemotherapy, and radiation</li> </ul>                                                                                                     | <ul style="list-style-type: none"> <li>• OOP costs</li> <li>• Work and finances inventory questionnaire</li> <li>• Costs for medical care, counseling and health maintenance, side-effect management, home maintenance, and other</li> <li>• Measured at baseline and 3, 6, 9, and 12 mo</li> <li>• Mean OOP monthly costs were higher at baseline compared with 12 mo (mean ratio, 1.37; 95% CI, 1.13–1.66; P=.007); no difference between 3, 6, 9, and 12 mo</li> </ul>                                                                                                                            |
| Abel et al, 2016 <sup>8</sup>    | CS           | Dana-Farber Cancer Institute, Mayo Clinic Arizona, Roswell Park Cancer Institute (n=325) | <ul style="list-style-type: none"> <li>• Age ≥18 y</li> <li>• English-speaking</li> <li>• ≥150 d post-HCT</li> </ul>                                                                         | <ul style="list-style-type: none"> <li>• 49% aged ≤60 y, 51% aged &gt;60 y</li> <li>• 40% female</li> <li>• 92% white, 8% nonwhite</li> <li>• 62% employer-based insurance, 30% government insurance, 8% self-insured</li> <li>• 53% received autologous, 47% received allogeneic HCT</li> <li>• 32% multiple myeloma, 24% NHL, 17% AML</li> </ul> | <ul style="list-style-type: none"> <li>• Financial distress at 6 mo from transplant</li> <li>• Hardship: "How satisfied are you with your family's present financial situation?" (49% unsatisfied); "How difficult is it to meet monthly payments?" (42% faced difficulties); "How do your family's finances work out at the end of the month?" (19% did not have enough money); any hardship, 56%; all 3 hardships, 15%</li> <li>• Difficulty: with temporary relocation, 19%; transit, gas, parking, 41%; changes at home, such as cleaning and special foods, 36%; any difficulty, 51%</li> </ul> |
| Banegas et al, 2016 <sup>9</sup> | Cohort-R     | 2012 LIVESTRONG Survey (n=4,719)                                                         | <ul style="list-style-type: none"> <li>• Age 18–64 y</li> <li>• Diagnosis of cancer, at any point in treatment</li> <li>• All sites</li> </ul>                                               | <ul style="list-style-type: none"> <li>• 32% aged 18–44 y, 34% aged 45–54 y, 34% aged 55–64 y</li> <li>• 67% female</li> <li>• 88% non-Hispanic white, 2% black, 6% Hispanic</li> <li>• 85% private insurance, 8% public insurance, 3% uninsured</li> </ul>                                                                                        | <ul style="list-style-type: none"> <li>• Financial hardship</li> <li>• Borrowed money or went into debt (34%), went into bankruptcy (3%), worried about paying bills (64%), made financial sacrifices (40%)</li> </ul>                                                                                                                                                                                                                                                                                                                                                                               |

(continued on next page)

Abbreviations: AI, aromatase inhibitor; ALL, acute lymphoblastic leukemia; AML, acute myeloid leukemia; BCCTP, Breast and Cervical Cancer Treatment Program; BCEI, Breast Cancer Education Intervention; BCS, breast-conserving surgery; CanCORS, (NCI) Cancer Care Outcomes Research and Surveillance; CCC, comprehensive cancer center; CCCWFU, Comprehensive Cancer Care—Wake Forest University; CLL, chronic lymphocytic leukemia; CML, chronic myeloid leukemia; Cohort-L, cohort-longitudinal; Cohort-P, cohort-prospective; Cohort-R, cohort-retrospective; COIN, Collection of Indirect and Nonmedical Direct Costs, modified for monthly OOP costs; COST, Comprehensive Score for financial Toxicity; CRC, colorectal cancer; CRN, cost-related medication nonadherence; CS, cross-sectional; CSS, Cancer Surveillance System; DCIS, ductal carcinoma in situ; EBC, early-stage breast cancer; ECSS, Experiences With Cancer Survivorship Supplement; GPH, general public hospital; HCT, hematopoietic cell transplantation; HMO, health maintenance organization; MBC, metastatic breast cancer; MCBS, Medicare Current Beneficiary Survey; MDS/MPN, myelodysplastic syndromes/myeloproliferative neoplasms; MEPS, Medical Expenditure Panel Survey; NHIS, National Health Interview Survey; NHL, non-Hodgkin's lymphoma; OOP, out-of-pocket; POS, point of service (insurance); PPO, preferred provider organization; VA, Veterans Administration.

**Table 2. Study and Patient Characteristics and Measures of Financial Toxicity Burdens (cont.)**

| Reference                              | Study Design | Setting/Data Source (Subjects, n)                                                                                                    | Study Inclusion                                                                                                                                                              | Participant Demographic                                                                                                                                                                                                                                      | Financial Toxicity Burden: Definition, Tool/Measure, Prevalence                                                                                                                                                                                                                                                                                                                 |
|----------------------------------------|--------------|--------------------------------------------------------------------------------------------------------------------------------------|------------------------------------------------------------------------------------------------------------------------------------------------------------------------------|--------------------------------------------------------------------------------------------------------------------------------------------------------------------------------------------------------------------------------------------------------------|---------------------------------------------------------------------------------------------------------------------------------------------------------------------------------------------------------------------------------------------------------------------------------------------------------------------------------------------------------------------------------|
| Chongpison et al, 2016 <sup>10</sup>   | Cohort-P     | Kaiser Permanente, North California or Oregon/Southwest Washington, 2010–2011 (n=576)                                                | <ul style="list-style-type: none"> <li>≥5 y from diagnosis of rectal cancer as of 2010</li> <li>Received a permanent ostomy or an anastomosis ± a temporary stoma</li> </ul> | <ul style="list-style-type: none"> <li>41% female</li> <li>83% white, 4% black, 8% Asian, 6% other races; 94% non-Hispanic ethnicity, 6% Hispanic</li> </ul>                                                                                                 | <ul style="list-style-type: none"> <li>Perceived financial burden</li> <li>The City of Hope Quality of Life Colorectal Cancer scale: “How much financial burden currently resulted from your illness and treatment?”</li> <li>Mean financial burden score, 2±2.8 on a scale of 0–10;</li> <li>22% perceived current financial burden as moderate to high (≥4 points)</li> </ul> |
| Delgado-Guay et al, 2016 <sup>11</sup> | CS           | MD Anderson Cancer Center, October 2012–January 2013 (n=292)                                                                         | <ul style="list-style-type: none"> <li>Diagnosis of advanced cancer</li> <li>All sites</li> </ul>                                                                            | <ul style="list-style-type: none"> <li>Median age, 61 y (range, 22–92 y)</li> <li>47% female</li> <li>65% white, 16% black, 12% Hispanic, 5% Asian</li> <li>53% metastasis, 41% local/recurrent disease, 6% no evidence of active disease</li> </ul>         | <ul style="list-style-type: none"> <li>Financial distress</li> <li>Edmonton Symptom Assessment Scale</li> <li>Distress/Suffering secondary to financial issues</li> </ul>                                                                                                                                                                                                       |
| DiMartino et al, 2017 <sup>12</sup>    | CS           | 2011 MEPS, ECSS (n=1,320)                                                                                                            | <ul style="list-style-type: none"> <li>Age ≥18 y</li> <li>All sites</li> </ul>                                                                                               | <ul style="list-style-type: none"> <li>23% aged &lt;55 y, 24% aged 55–64 y, 27% aged 65–74 y, 26% aged ≥75 y</li> <li>56% female</li> <li>90% non-Hispanic white, 10% minority</li> <li>72% private insurance, 24% public insurance, 4% uninsured</li> </ul> | <ul style="list-style-type: none"> <li>Financial hardship</li> <li>Ever unable to cover share of costs of medical visits due to cancer (12%)</li> </ul>                                                                                                                                                                                                                         |
| Fariñas et al, 2018 <sup>13</sup>      | CS           | Truven Health Analytics MarketScan commercial claims and encounters database, January 2008–December 2010 (n=6,863)                   | <ul style="list-style-type: none"> <li>Age ≤64 y</li> <li>Diagnosis of EBC</li> <li>Breast cancer surgery ≤12 mo</li> <li>≥1 prescription for AI or tamoxifen</li> </ul>     | <ul style="list-style-type: none"> <li>8% aged 18–39 y, 33% aged 40–49 y, 41% aged 50–59 y, 17% aged 60–64 y</li> <li>18% HMO, 60% PPO, 22% other insurance</li> <li>33% mastectomy, 67% BCS</li> </ul>                                                      | <ul style="list-style-type: none"> <li>OOP costs</li> <li>30-d supply of medications including copayments (accounted for 89% toward OOP), deductibles (6%), and coinsurance (5%); mean, \$17.10</li> <li>Other OOP costs included inpatient/outpatient services and other pharmacy medications (mean, \$176.50)</li> </ul>                                                      |
| Kale & Carroll, 2016 <sup>14</sup>     | CS           | 2011 MEPS (n=380)                                                                                                                    | <ul style="list-style-type: none"> <li>Diagnosis of cancer</li> <li>All sites</li> </ul>                                                                                     | <ul style="list-style-type: none"> <li>72% aged &lt;65 y</li> <li>56% female</li> <li>88% non-Hispanic white, 5% Hispanic, 5% black</li> <li>71% private insurance, 25% public insurance, 92% any insurance</li> </ul>                                       | <ul style="list-style-type: none"> <li>Cancer-related financial burden</li> <li>Problem: loans, debt, bankruptcy; financial sacrifices; worry about paying large medical bills; inability to cover cost of medical care visits</li> <li>29% had ≥1 problem, 2% had all 4 problems</li> </ul>                                                                                    |
| Keim-Malpass et al, 2016 <sup>15</sup> | CS           | Memorial Sloan Kettering Cancer Center and University of Texas–Southwestern Center for Breast Care, April 2003–February 2006 (n=258) | <ul style="list-style-type: none"> <li>Age ≥18 y</li> <li>Diagnosis of stage I–III breast cancer within ≤8 mo</li> <li>Fluent in English</li> </ul>                          | <ul style="list-style-type: none"> <li>Mean age, 49.9±9.62 y</li> <li>95% white/Caucasian, 5% nonwhite</li> <li>50% stage I, 41% stage II, 9% stage III</li> <li>74% chemotherapy</li> </ul>                                                                 | <ul style="list-style-type: none"> <li>Workplace perception</li> <li>Scale from 1 (not at all) to 5 (very much)</li> <li>Supportive work environment (mean, 3.92±1.21); ability to keep up work responsibilities (mean, 4.51±0.81)</li> <li>Financial problems: financial worries (mean, 2.10±1.22); difficulty paying for basics (16%)</li> </ul>                              |

(continued on next page)

Abbreviations: AI, aromatase inhibitor; ALL, acute lymphoblastic leukemia; AML, acute myeloid leukemia; BCC/TP, Breast and Cervical Cancer Treatment Program; BCEI, Breast Cancer Education Intervention; BCS, breast-conserving surgery; CanCORS, (NCI) Cancer Care Outcomes Research and Surveillance; CCC, comprehensive cancer center; CCCW/UFU, Comprehensive Cancer Care—Wake Forest University; CLL, chronic lymphocytic leukemia; CML, chronic myeloid leukemia; Cohort-L, cohort-longitudinal; Cohort-P, cohort-prospective; Cohort-R, cohort-retrospective; COIN, Collection of Indirect and Nonmedical Direct Costs, modified for monthly OOP costs; COST, Comprehensive Score for financial Toxicity, CRC, colorectal cancer; CRN, cost-related medication nonadherence; CS, cross-sectional; CSS, Cancer Surveillance System; DCIS, ductal carcinoma in situ; EBC, early-stage breast cancer; ECSS, Experiences With Cancer Survivorship Supplement; GPH, general public hospital; HCT, hematopoietic cell transplantation; HMO, health maintenance organization; MBC, metastatic breast cancer; MCBs, Medicare Current Beneficiary Survey; MDS/MPN, myelodysplastic syndromes/myeloproliferative neoplasm; MEPS, Medical Expenditure Panel Survey; NHIS, National Health Interview Survey; NHL, non-Hodgkin’s lymphoma; OOP, out-of-pocket; POS, point of service (insurance); PPO, preferred provider organization; VA, Veterans Administration.

**eTable 2. Study and Patient Characteristics and Measures of Financial Toxicity Burdens (cont.)**

| Reference                         | Study Design | Setting/Data Source (Subjects, n)                                               | Study Inclusion                                                                                                                             | Participant Demographic                                                                                                                                                                                                                                                                                       | Financial Toxicity Burden: Definition, Tool/Measure, Prevalence                                                                                                                                                                                                                                                                                                                                                                                                                                                                                                                                                                                                                                |
|-----------------------------------|--------------|---------------------------------------------------------------------------------|---------------------------------------------------------------------------------------------------------------------------------------------|---------------------------------------------------------------------------------------------------------------------------------------------------------------------------------------------------------------------------------------------------------------------------------------------------------------|------------------------------------------------------------------------------------------------------------------------------------------------------------------------------------------------------------------------------------------------------------------------------------------------------------------------------------------------------------------------------------------------------------------------------------------------------------------------------------------------------------------------------------------------------------------------------------------------------------------------------------------------------------------------------------------------|
| Lathan et al, 2016 <sup>6</sup>   | Cohort-P     | CanCORS Consortium, 2003–2005 (2,434 patients with lung cancer, 2,909 with CRC) | <ul style="list-style-type: none"> <li>Patients or surrogates of patients from CanCORS study</li> <li>4–12 mo from diagnosis</li> </ul>     | <ul style="list-style-type: none"> <li>Age &lt;59 y at diagnosis: 27% (lung cancer) and 38% (CRC)</li> <li>44% female (both lung cancer and CRC)</li> <li>Patients who were white: 74% (lung cancer) and 65% (CRC)</li> </ul>                                                                                 | <ul style="list-style-type: none"> <li>Patient-reported financial reserves</li> <li>"If you lost all of your current sources of income and had to live off savings, how long could you continue to live at your current address and standard of living?" (&lt;1 mo, 1–2 mo, 3–6 mo, 7–12 mo, &gt;1 y, do not know)</li> <li>40% patients lung cancer and 33% with CRC had financial reserves (&lt;2 mo)</li> </ul>                                                                                                                                                                                                                                                                             |
| Lee & Khan, 2016 <sup>17</sup>    | CS           | NHIS, 2006–2013 (n=15,159)                                                      | <ul style="list-style-type: none"> <li>Age ≥20 y</li> <li>All sites</li> </ul>                                                              | <ul style="list-style-type: none"> <li>8% aged &lt;40 y, 39% aged 40–64 y, 35% aged 65–79 y, 18% aged ≥80 y</li> <li>62% female</li> <li>77% non-Hispanic white, 12% black, 8% Hispanic, 3% Asian</li> <li>28% private insurance, 52% Medicare, 4% Medicaid, 9% government insurance, 7% uninsured</li> </ul> | <ul style="list-style-type: none"> <li>CRN</li> <li>"During the past 12 mo, was there a time when you did not take your prescribed medication because of cost? Do not include OTC medications"; 11% reported CRN</li> </ul>                                                                                                                                                                                                                                                                                                                                                                                                                                                                    |
| Lee & Salloum, 2016 <sup>18</sup> | CS           | NHIS, 2006–2013 (n=10,998)                                                      | <ul style="list-style-type: none"> <li>Age ≥18 y</li> <li>All sites</li> <li>At least 1 y from diagnosis</li> </ul>                         | <ul style="list-style-type: none"> <li>10% aged &lt;40 y, 47% aged 40–64 y, 35% aged 65–79 y, 8% aged ≥80 y</li> <li>58% female</li> <li>79% non-Hispanic white, 12% black, 9% Hispanic</li> <li>34% private insurance, 5% Medicaid, 43% Medicare, 10% government insurance, 8% uninsured</li> </ul>          | <ul style="list-style-type: none"> <li>CRN</li> <li>"During the past 12 mo, was there a time when you did not take your prescribed medication because of cost? Do not include OTC medications"; 13% reported CRN</li> </ul>                                                                                                                                                                                                                                                                                                                                                                                                                                                                    |
| Meeker et al, 2016 <sup>19</sup>  | CS           | Fox Chase Cancer Center, September 2013–April 2014 (n=120)                      | <ul style="list-style-type: none"> <li>Age &gt;18 y</li> <li>Received anticancer medications</li> <li>All sites</li> <li>Insured</li> </ul> | <ul style="list-style-type: none"> <li>Median age, 62 y (range, 22–87 y)</li> <li>52% female</li> <li>84% white, 11% black, 3% Asian, 1% Hispanic, 1% other</li> <li>68% surgery, 67% chemotherapy, 39% radiation, 16% targeted therapy, 15% hormone therapy</li> </ul>                                       | <ul style="list-style-type: none"> <li>Financial concerns</li> <li>InCharge Financial Distress/Financial Well-Being Scale</li> <li>Concerns: need to continue to work to pay for treatment (40%), paying for treatment (43%), paying other bills (41%)</li> <li>Most frequent assistant needs: knowing whom to ask for help (29%), identifying sources of financial assistance (26%), understanding the insurance policy (24%), and accessing community resources (21%)</li> <li>Financial distress: InCharge scale; 29% had high to overwhelming financial distress</li> <li>Overall distress: score of ≥4 (65%), ≥8 (28%)</li> <li>Emotional distress: ≥1 emotional symptom (66%)</li> </ul> |

(continued on next page)

Abbreviations: AI, aromatase inhibitor; ALL, acute lymphoblastic leukemia; AML, acute myeloid leukemia; BCC/TP, Breast and Cervical Cancer Treatment Program; BCEI, Breast Cancer Education Intervention; BCS, breast-conserving surgery; CanCORS, (NCI) Cancer Care Outcomes Research and Surveillance; CCC, comprehensive cancer center; CCCWFU, Comprehensive Cancer Care—Wake Forest University; CLL, chronic lymphocytic leukemia; CML, chronic myeloid leukemia; Cohort-L, cohort-longitudinal; Cohort-P, cohort-prospective; Cohort-R, cohort-retrospective; COIN, Collection of Indirect and Nonmedical Direct Costs, modified for monthly OOP costs; COST, Comprehensive Score for financial Toxicity; CRC, colorectal cancer; CRN, cost-related medication nonadherence; CS, cross-sectional; CSS, Cancer Surveillance System; DCIS, ductal carcinoma in situ; EBC, early-stage breast cancer; ECSS, Experiences With Cancer Survivorship Supplement; GPH, general public hospital; HCT, hematopoietic cell transplantation; HMO, health maintenance organization; MBC, metastatic breast cancer; MCBS, Medicare Current Beneficiary Survey; MDS/MPN, myelodysplastic syndromes/myeloproliferative neoplasm; MEPS, Medical Expenditure Panel Survey; NHIS, National Health Interview Survey; NHL, non-Hodgkin's lymphoma; OOP, out-of-pocket; POS, point of service (insurance); PPO, preferred provider organization; VA, Veterans Administration.

**eTable 2. Study and Patient Characteristics and Measures of Financial Toxicity Burdens (cont.)**

| Reference                             | Study Design | Setting/Data Source (Subjects, n)                                                                                                | Study Inclusion                                                                                                                                                     | Participant Demographic                                                                                                                                                                                                                                                                                      | Financial Toxicity Burden: Definition, Tool/Measure, Prevalence                                                                                                                                                                                                                                                                                                                                                                                                                                                                       |
|---------------------------------------|--------------|----------------------------------------------------------------------------------------------------------------------------------|---------------------------------------------------------------------------------------------------------------------------------------------------------------------|--------------------------------------------------------------------------------------------------------------------------------------------------------------------------------------------------------------------------------------------------------------------------------------------------------------|---------------------------------------------------------------------------------------------------------------------------------------------------------------------------------------------------------------------------------------------------------------------------------------------------------------------------------------------------------------------------------------------------------------------------------------------------------------------------------------------------------------------------------------|
| Narang & Nicholas, 2017 <sup>20</sup> | CS           | Health and Retirement Study, July 2002–December 2012 (n=1,409)                                                                   | <ul style="list-style-type: none"> <li>• Age &gt;65 y</li> <li>• New cancer diagnosis</li> <li>• All sites</li> </ul>                                               | <ul style="list-style-type: none"> <li>• Median age, 73 y (interquartile range, 69–79 y)</li> <li>• 46% female</li> <li>• 91% white, 8% black</li> <li>• 8% Medicaid, 8% VA, 18% Medicare HMO, 28% employer-sponsored, 25% Medigap, 13% uninsured</li> </ul>                                                 | <ul style="list-style-type: none"> <li>• Financial burden</li> <li>• Calculated as OOP expenses divided by total household income</li> </ul>                                                                                                                                                                                                                                                                                                                                                                                          |
| Nipp et al, 2016 <sup>21</sup>        | CS           | Health Well Foundation (financial assistance program), June 2010–May 2011 (n=174)                                                | <ul style="list-style-type: none"> <li>• Age ≥21 y</li> <li>• On active chemotherapy or hormonal therapy for solid tumor malignancy</li> <li>• All sites</li> </ul> | <ul style="list-style-type: none"> <li>• Median age, 67 y</li> <li>• 96% female</li> <li>• 83% Caucasian</li> <li>• 69% Medicare, 3% Medicaid, 16% employer-provided, 20% personal insurance, 35% personal supplemental, 20% other</li> <li>• 85% breast cancer, 4% CRC</li> <li>• 69% metastasis</li> </ul> | <ul style="list-style-type: none"> <li>• Financial burden</li> <li>• Care altering coping: did not fill prescription (28%), took less medication (22%), missed a test (10%), missed a procedure (8%), missed an appointment (6%)</li> <li>• Lifestyle altering coping: reduced spending on leisure (78%), reduced spending on basics (57%), borrowed money to pay for medications (54%), used savings (50%), sold possessions (18%), family worked more (15%)</li> </ul>                                                              |
| Ramsey et al, 2016 <sup>22</sup>      | Cohort-R     | CSS of Western Washington linked with federal bankruptcy records, 1995–2009 (n=231,596 [original], n=4,728 [propensity-matched]) | <ul style="list-style-type: none"> <li>• Age ≥21 y</li> <li>• Diagnosis of primary cancer</li> <li>• All sites</li> </ul>                                           | <ul style="list-style-type: none"> <li>• Mean age, 53 y</li> <li>• 46% female</li> <li>• 86% white, 14% nonwhite</li> </ul>                                                                                                                                                                                  | <ul style="list-style-type: none"> <li>• Financial insolvency</li> <li>• Filed for bankruptcy after cancer diagnosis (2%)</li> </ul>                                                                                                                                                                                                                                                                                                                                                                                                  |
| Whitney et al, 2016 <sup>23</sup>     | CS           | 2011 MEPS (n=1,209)                                                                                                              | <ul style="list-style-type: none"> <li>• Age ≥18 y</li> <li>• Completed ECSS survey</li> <li>• All sites</li> </ul>                                                 | <ul style="list-style-type: none"> <li>• 46% aged &lt;65 y, 54% aged ≥65 y</li> <li>• 58% female</li> <li>• 84% non-Hispanic white, 16% minority</li> <li>• 4% uninsured, 27% public insurance, 68% private insurance</li> </ul>                                                                             | <ul style="list-style-type: none"> <li>• Self-reported financial concerns: financial difficulty: Debt, bankruptcy, inability to cover medical costs (18%); financial worry: Financial sacrifices or worry about bills (28%)</li> <li>• 33% ≥1 of above concerns</li> <li>• Self-reported work concerns: long-term work modification: Changing to a less demanding job, delaying, or taking early retirement (15%); short-term work modification: extended/unpaid leave from work (39%)</li> <li>• 44% ≥1 of above concerns</li> </ul> |

(continued on next page)

Abbreviations: AI, aromatase inhibitor; ALL, acute lymphoblastic leukemia; AML, acute myeloid leukemia; BCCTP, Breast and Cervical Cancer Treatment Program; BCEI, Breast Cancer Education Intervention; BCS, breast-conserving surgery; CanCORS, (NCI) Cancer Care Outcomes Research and Surveillance; CCC, comprehensive cancer center; CCCWFU, Comprehensive Cancer Care—Wake Forest University; CLL, chronic lymphocytic leukemia; CML, chronic myeloid leukemia; Cohort-L, cohort-longitudinal; Cohort-P, cohort-prospective; Cohort-R, cohort-retrospective; COIN, Collection of Indirect and Nonmedical Direct Costs, modified for monthly OOP costs; COST, Comprehensive Score for financial Toxicity, CRC, colorectal cancer; CRN, cost-related medication nonadherence; CS, cross-sectional; CSS, Cancer Surveillance System; DCIS, ductal carcinoma in situ; EBC, early-stage breast cancer; ECSS, Experiences With Cancer Survivorship Supplement; GPH, general public hospital; HCT, hematopoietic cell transplantation; HMO, health maintenance organization; MBC, metastatic breast cancer; MCBS, Medicare Current Beneficiary Survey; MDS/MPN, myelodysplastic syndromes/myeloproliferative neoplasm; MEPS, Medical Expenditure Panel Survey; NHIS, National Health Interview Survey; NHL, non-Hodgkin's lymphoma, OOP, out-of-pocket; POS, point of service (insurance); PPO, preferred provider organization; VA, Veterans Administration.

**Table 2. Study and Patient Characteristics and Measures of Financial Toxicity Burdens (cont.)**

| Reference                                      | Study Design | Setting/Data Source (Subjects, n)                                                                       | Study Inclusion                                                                                                                                                       | Participant Demographic                                                                                                                                                                             | Financial Toxicity Burden: Definition, Tool/Measure, Prevalence                                                                                                                                                                                                                                                                                                                                                                                                                                                                 |
|------------------------------------------------|--------------|---------------------------------------------------------------------------------------------------------|-----------------------------------------------------------------------------------------------------------------------------------------------------------------------|-----------------------------------------------------------------------------------------------------------------------------------------------------------------------------------------------------|---------------------------------------------------------------------------------------------------------------------------------------------------------------------------------------------------------------------------------------------------------------------------------------------------------------------------------------------------------------------------------------------------------------------------------------------------------------------------------------------------------------------------------|
| Wong et al, 2016 <sup>24</sup>                 | CS           | NCI cancer centers in Ohio, Pennsylvania, Illinois, and Michigan, April 2010–September 2012 (n=1,233)   | <ul style="list-style-type: none"> <li>• Diagnosis of cancer</li> <li>• All sites</li> </ul>                                                                          | <ul style="list-style-type: none"> <li>• 73% aged ≤65 y, 27% aged &gt;65 y</li> <li>• 58% female</li> <li>• 88% white, 12% nonwhite</li> <li>• 42% metastasis</li> </ul>                            | <ul style="list-style-type: none"> <li>• Financial concerns</li> <li>• a = cost-related burden; b + c = uncertainty; a + b + c = total score (range, 0–15); higher score indicates greater concerns</li> <li>• (a) How much of a burden on you is the cost of your medical care? (22% major or extreme burden); (b) I am afraid that my health insurance will not pay for a clinical trial (40% agreed); (c) I am worried that I would not be able to afford the cost of treatment for a clinical trial (30% agreed)</li> </ul> |
| Yabroff et al, 2016 <sup>25</sup>              | CS           | 2011 MEPS, ECSS (n=1,202)                                                                               | <ul style="list-style-type: none"> <li>• Age ≥18 y</li> <li>• All sites</li> </ul>                                                                                    | <ul style="list-style-type: none"> <li>• 53% aged ≥65 y</li> <li>• 61% female</li> <li>• 76% non-Hispanic white, 24% all other</li> </ul>                                                           | <ul style="list-style-type: none"> <li>• Financial hardship</li> <li>• 20% material hardship (loans, debt, bankruptcy, inability to cover medical costs, financial sacrifices) (20%); 23% psychological hardship (worry about paying large medical bills)</li> </ul>                                                                                                                                                                                                                                                            |
| Zheng et al, 2015 <sup>26</sup>                | CS           | MEPS household component, 2008–2012 (n=3,278)                                                           | <ul style="list-style-type: none"> <li>• Age ≥18 y</li> <li>• CRC, female breast cancer, and male prostate cancer survivors vs adults without cancer</li> </ul>       | <ul style="list-style-type: none"> <li>• 55% CRC, 57% female</li> <li>• 72%–87% non-Hispanic white</li> <li>• 16% CRC, 48% breast cancer, 36% prostate cancer among all cancer survivors</li> </ul> | <ul style="list-style-type: none"> <li>• Economic burden</li> <li>• Medical expenses: for inpatient/outpatient, home healthcare, dental care, vision care, prescriptions; examined by source of payment (OOP, insurance) and by type of service (ambulatory, inpatient)</li> <li>• Productivity losses: employment disability, missed days at work, days spent in bed, reason for not working</li> </ul>                                                                                                                        |
| Callahan & Brintzenhofesoc, 2015 <sup>27</sup> | CS           | University of Maryland, Baltimore, and The Catholic University of America, May 2010–October 2011 (n=90) | <ul style="list-style-type: none"> <li>• Diagnosis of cancer</li> <li>• All sites</li> </ul>                                                                          | <ul style="list-style-type: none"> <li>• 60% female</li> <li>• 35% African American, 53% Caucasian, 6% multiracial, 7% other race</li> <li>• 83% insured</li> </ul>                                 | <ul style="list-style-type: none"> <li>• Financial quality of life</li> <li>• Ability to manage all current and future financial obligations related to cancer care, within the context of sound healthcare decision-making</li> <li>• Socioeconomic Well-Being Scale</li> </ul>                                                                                                                                                                                                                                                |
| Delgado-Guay et al, 2015 <sup>28</sup>         | CS           | CCC, GPH in Texas (n=149)                                                                               | <ul style="list-style-type: none"> <li>• Age &gt;18 y</li> <li>• Normal cognition</li> <li>• Diagnosis of advanced breast, colon, lung, or prostate cancer</li> </ul> | <ul style="list-style-type: none"> <li>• Mean age, 60 y</li> <li>• 50% female</li> <li>• 41% white, 36% black, 23% Hispanic</li> <li>• 81% metastasis</li> </ul>                                    | <ul style="list-style-type: none"> <li>• Objective financial burden: % of family income spent on OOP expenses on healthcare during the last month, without considering health insurance</li> <li>• Subjective financial distress: distress due to financial burden within the past month (concerns, difficulties, worries)</li> </ul>                                                                                                                                                                                           |

(Continued on next page)

Abbreviations: AI, aromatase inhibitor; ALL, acute lymphoblastic leukemia; AML, acute myeloid leukemia; BCCTP, Breast and Cervical Cancer Treatment Program; BCEI, Breast Cancer Education Intervention; BCS, breast-conserving surgery; CanCORS, (NCI) Cancer Care Outcomes Research and Surveillance; CCC, comprehensive cancer center; CCCWFU, Comprehensive Cancer Care—Wake Forest University; CLL, chronic lymphocytic leukemia; CML, chronic myeloid leukemia; Cohort-L, cohort-longitudinal; Cohort-P, cohort-prospective; Cohort-R, cohort-retrospective; COIN, Collection of Indirect and Nonmedical Direct Costs, modified for monthly OOP costs; COST, Comprehensive Score for financial Toxicity; CRC, colorectal cancer; CRN, cost-related medication nonadherence; CS, Cancer Surveillance System; DCIS, ductal carcinoma in situ; EBC, early-stage breast cancer; ECSS, Experiences With Cancer Survivorship Supplement; GPH, general public hospital; HCT, hematopoietic cell transplantation; HMO, health maintenance organization; MBC, metastatic breast cancer; MCBS, Medicare Current Beneficiary Survey; MDS/MPN, myelodysplastic syndromes/myeloproliferative neoplasm; MEPS, Medical Expenditure Panel Survey; NHS, National Health Interview Survey; NHL, non-Hodgkin's lymphoma; OOP, out-of-pocket; POS, point-of-service (insurance); PPO, preferred provider organization; VA, Veterans Administration.

**eTable 2. Study and Patient Characteristics and Measures of Financial Toxicity Burdens (cont.)**

| Reference                               | Study Design | Setting/Data Source (Subjects, n)                                                      | Study Inclusion                                                                                                                                                                 | Participant Demographic                                                                                                                                                                                                                                                                                                                                                                       | Financial Toxicity Burden: Definition, Tool/Measure, Prevalence                                                                                                                                                                                                                                                                                                                |
|-----------------------------------------|--------------|----------------------------------------------------------------------------------------|---------------------------------------------------------------------------------------------------------------------------------------------------------------------------------|-----------------------------------------------------------------------------------------------------------------------------------------------------------------------------------------------------------------------------------------------------------------------------------------------------------------------------------------------------------------------------------------------|--------------------------------------------------------------------------------------------------------------------------------------------------------------------------------------------------------------------------------------------------------------------------------------------------------------------------------------------------------------------------------|
| Guy et al, 2015 <sup>29</sup>           | CS           | 2008–2012 MEPS (n=4,271)                                                               | <ul style="list-style-type: none"> <li>Age 18–64 y</li> <li>Cancer survivors (all sites) vs adults without cancer</li> </ul>                                                    | <ul style="list-style-type: none"> <li>65% aged 50–64 y</li> <li>65% female</li> <li>81% non-Hispanic white, 8% black, 7% Hispanic</li> <li>74% private insurance, 15% public insurance, 11% uninsured</li> </ul>                                                                                                                                                                             | <ul style="list-style-type: none"> <li>OOP expense burden</li> <li>% OOP costs relative to family income</li> <li>High OOP = expenses ≥20% of family income (4%)</li> </ul>                                                                                                                                                                                                    |
| Huntington et al, 2015 <sup>30</sup>    | CS           | Tertiary academic medical center in Philadelphia, PA, August 2014–January 2015 (n=100) | <ul style="list-style-type: none"> <li>Diagnosis of multiple myeloma</li> <li>≥3 mo ongoing treatment</li> </ul>                                                                | <ul style="list-style-type: none"> <li>Mean age, 64 y</li> <li>53% female</li> <li>71% white, 26% black</li> <li>43% commercial insurance, 39% Medicare fee-for-service with supplement, 10% Medicare HMO</li> </ul>                                                                                                                                                                          | <ul style="list-style-type: none"> <li>Financial toxicity</li> <li>COST tool and patient self-report</li> <li>Mean COST score, 23±11; score ≤23 = higher financial burden</li> <li>Self-reported significant financial burden (19%)</li> <li>Self-reported higher than expected treatment costs (59%)</li> </ul>                                                               |
| Jones et al, 2015 <sup>31</sup>         | CS           | Colorado Central Cancer Registry, May 2002–August 2006 (n=477)                         | <ul style="list-style-type: none"> <li>Age 18–85 y, resident of Colorado</li> <li>Diagnoses of leukemia or lymphoma</li> <li>Completed treatment within past 3–48 mo</li> </ul> | <ul style="list-style-type: none"> <li>15% aged 18–39 y, 53% aged 40–64 y, 31% aged 65–85 y</li> <li>46% female</li> <li>91% white, 5% Hispanic, 2% black</li> <li>60% NHL, 19% Hodgkin lymphoma, 5% AML, 2% ALL, 6% CML, 8% CLL</li> <li>94% chemotherapy, 5% bone marrow transplant</li> </ul>                                                                                              | <ul style="list-style-type: none"> <li>Perceived financial burden</li> <li>“How much financial burden have you incurred because of illness and treatment?” (0 [none]–10 [a great deal])</li> <li>Mean perceived financial burden, 4.2±3.6</li> </ul>                                                                                                                           |
| Palmer et al, 2015 <sup>32</sup>        | CS           | NCI-CCCWFU, January 2009–November 2011 (n=191)                                         | <ul style="list-style-type: none"> <li>Diagnosis of first primary breast cancer, nonmetastasis</li> <li>Completed treatment within past 6–24 mo</li> </ul>                      | <ul style="list-style-type: none"> <li>22% aged &lt;50 y, 35% aged 50–59 y, 27% aged 60–69 y, 16% aged &gt;70 y</li> <li>84% white, 16% black</li> <li>61% private insurance, 8% public insurance, 25% both private and public insurance, 6% uninsured</li> </ul>                                                                                                                             | <ul style="list-style-type: none"> <li>Cost-related barriers to follow-up care</li> <li>OOP medical costs are too high (32%); insurance does not cover it (22%); cannot afford other costs to receive care (eg, gas/travel or lost wages) (25%)</li> </ul>                                                                                                                     |
| Pisu et al, 2015 <sup>33</sup>          | CS           | CanCORS Consortium after 2003 (n=3,342 [1,364 with lung cancer, 2,068 with CRC])       | <ul style="list-style-type: none"> <li>Diagnosis of lung cancer or CRC in past 4–12 mo</li> </ul>                                                                               | <ul style="list-style-type: none"> <li>For lung and CRC patients, respectively:                             <ul style="list-style-type: none"> <li>Age &lt;54 y at diagnosis: 13%, 24%</li> <li>Female: 49%, 46%</li> <li>White: 83%, 76%; black: 12%, 15%; Hispanic: 5%, 8%</li> <li>Uninsured: 1%, 3%; no prescription coverage: 14%, 10%</li> <li>Stage I: 42%, 26%</li> </ul> </li> </ul> | <ul style="list-style-type: none"> <li>Self-reported economic hardship</li> <li>Any economic hardship (53% lung cancer, 46% CRC)</li> <li>Difficulty living on current income (extremely difficult: 4% lung cancer, 2% CRC); anticipating hardship (a great deal: 4% lung cancer, 4% CRC); anticipating reductions in living (a great deal: 6% lung cancer, 5% CRC)</li> </ul> |
| Tucker-Seeley et al, 2015 <sup>34</sup> | CS           | Multisite, September 2002–February 2008 (n=281)                                        | <ul style="list-style-type: none"> <li>Age ≥20 y</li> <li>Advanced cancer with metastasis</li> <li>All sites</li> </ul>                                                         | <ul style="list-style-type: none"> <li>Mean age, 59 y</li> <li>46% female</li> <li>66% white, 34% black</li> <li>63% insured, 37% uninsured</li> </ul>                                                                                                                                                                                                                                        | <ul style="list-style-type: none"> <li>Financial hardship</li> <li>Household had to use all or most of savings because of family member's illness (29%)</li> </ul>                                                                                                                                                                                                             |

(continued on next page)

Abbreviations: AI, aromatase inhibitor; ALL, acute lymphoblastic leukemia; AML, acute myeloid leukemia; BCCTP, Breast and Cervical Cancer Treatment Program; BCEI, Breast Cancer Education Intervention; BCS, breast-conserving surgery; CanCORS, (NCI) Cancer Care Outcomes Research and Surveillance; CCC, comprehensive cancer center; CCCWFU, Comprehensive Cancer Care—Wake Forest University; CLL, chronic lymphocytic leukemia; CML, chronic myeloid leukemia; Cohort-L, cohort-longitudinal; Cohort-P, cohort-prospective; Cohort-R, cohort-retrospective; COIN, Collection of Indirect and Nonmedical Direct Costs, modified for monthly OOP costs; COST, Comprehensive Score for financial Toxicity; CRC, colorectal cancer; CRN, cost-related medication nonadherence; CS, cross-sectional; CSS, Cancer Surveillance System; DCIS, ductal carcinoma in situ; EBC, early-stage breast cancer; ECSS, Experiences With Cancer Survivorship Supplement; GPH, general public hospital; HCT, hematopoietic cell transplantation; HMO, health maintenance organization; MBC, metastatic breast cancer; MCBS, Medicare Current Beneficiary Survey; MDS/MPN, myelodysplastic syndromes/myeloproliferative neoplasm; MEPS, Medical Expenditure Panel Survey; NHIS, National Health Interview Survey; NHL, non-Hodgkin's lymphoma; OOP, out-of-pocket; POS, point of service (insurance); PPO, preferred provider organization; VA, Veterans Administration.



**eTable 2. Study and Patient Characteristics and Measures of Financial Toxicity Burdens (cont.)**

| Reference                           | Study Design                                     | Setting/Data Source (Subjects, n)                                                                        | Study Inclusion                                                                                                                                                                                             | Participant Demographic                                                                                                                                                                                                                                                                                 | Financial Toxicity Burden: Definition, Tool/Measure, Prevalence                                                                                                                                                                                                                                                                                                                                                                                                     |
|-------------------------------------|--------------------------------------------------|----------------------------------------------------------------------------------------------------------|-------------------------------------------------------------------------------------------------------------------------------------------------------------------------------------------------------------|---------------------------------------------------------------------------------------------------------------------------------------------------------------------------------------------------------------------------------------------------------------------------------------------------------|---------------------------------------------------------------------------------------------------------------------------------------------------------------------------------------------------------------------------------------------------------------------------------------------------------------------------------------------------------------------------------------------------------------------------------------------------------------------|
| Zafar et al, 2015 <sup>35</sup>     | CS                                               | CanCORS Consortium (n=1,000)                                                                             | <ul style="list-style-type: none"> <li>Diagnosis of lung cancer or CRC</li> <li>Survivors/Disease-free or presence of recurrent/advanced disease</li> </ul>                                                 | <ul style="list-style-type: none"> <li>Median age, 64 y (range, 52–82 y)</li> <li>47% female</li> <li>76% white, 24% nonwhite</li> <li>81% private insurance, 50% Medicare, 4% Medicaid, 12% VA/military, 2% other</li> <li>27% lung cancer, 73% CRC</li> <li>89% cancer-free, 11% recurrent</li> </ul> | <ul style="list-style-type: none"> <li>Financial burden</li> <li>Difficulty living on household income (48%)</li> <li>Quality of insurance coverage</li> </ul>                                                                                                                                                                                                                                                                                                      |
| Bender et al, 2014 <sup>36</sup>    | Cohort-L                                         | Comprehensive Breast Program, University of Pittsburgh Cancer Institute, December 2008–March 2010 (n=91) | <ul style="list-style-type: none"> <li>Age 18–75 y</li> <li>Hormone-positive EBC (stage I, II, or IIIa)</li> <li>Received endocrine therapy</li> <li>Completed ≥8 y education, fluent in English</li> </ul> | <ul style="list-style-type: none"> <li>Mean age, 56.7 ± 9.7 y</li> <li>97% Caucasian</li> <li>59% stage I, 41% stage II/III</li> <li>23% chemotherapy</li> </ul>                                                                                                                                        | <ul style="list-style-type: none"> <li>Financial hardship</li> <li>OOP costs (COIN instrument) (<math>\bar{x}</math> = 307.5 ± 734.2)</li> <li>Measure of economic hardship across 4 domains: financial strain (<math>\bar{x}</math> = 2.3 ± 0.99), inability to make ends meet (<math>\bar{x}</math> = 6.9 ± 0.98), not enough money for necessities (<math>\bar{x}</math> = 12.8 ± 5.5), cutbacks and adjustments (<math>\bar{x}</math> = 17.4 ± 0.95)</li> </ul> |
| Bestvina et al, 2014 <sup>37</sup>  | CS                                               | Duke Cancer Institute and affiliated clinics, November 2012–June 2013 (n=300)                            | <ul style="list-style-type: none"> <li>Diagnosis of solid tumor malignancy</li> <li>All sites</li> <li>Had insurance</li> <li>≥ 1 mo anticancer therapy</li> </ul>                                          | <ul style="list-style-type: none"> <li>Median age, 60 y</li> <li>48% female</li> <li>76% white, 24% nonwhite</li> <li>56% private insurance, 44% nonprivate insurance</li> </ul>                                                                                                                        | <ul style="list-style-type: none"> <li>Financial burden</li> <li>Objective financial burden: if patients discussed OOP costs with their oncologist</li> <li>Subjective financial distress: InCharge financial distress/well-being scale</li> <li>16% had high/overwhelming financial distress, 39% had higher than expected financial burden</li> </ul>                                                                                                             |
| de Souza et al, 2014 <sup>38</sup>  | Item and exploratory factor analysis (COST tool) | University of Chicago, January 2012–August 2013 (n=155)                                                  | <ul style="list-style-type: none"> <li>Diagnosis of advanced cancer</li> <li>Receiving treatment</li> <li>≥ 3 mo</li> <li>All sites</li> </ul>                                                              | <ul style="list-style-type: none"> <li>Median age, 59.5 y (range, 24–84 y)</li> <li>45% female</li> <li>74% non-Hispanic white, 18% black, 6% Hispanic, 2% other</li> <li>62% private or employer insurance, 32% Medicare, 4% Medicaid</li> </ul>                                                       | <ul style="list-style-type: none"> <li>Financial toxicity</li> <li>COST tool</li> <li>Themes: resources, personal affect, financial coping, family support</li> <li>Median COST score, 21 (range, 3–44; mean, 22.5 ± 11.3);</li> <li>Higher score = lower financial toxicity</li> </ul>                                                                                                                                                                             |
| Dusetzina et al, 2014 <sup>39</sup> | Cohort-R                                         | Truven Health MarketScan database, 2002–2011 (n=1,541)                                                   | <ul style="list-style-type: none"> <li>Age 18–64 y</li> <li>Diagnosis of CML</li> <li>Have insurance from 3 mo before and 6 mo after initiation of imatinib</li> </ul>                                      | <ul style="list-style-type: none"> <li>Mean age, 48.8 y (SD, 11.0)</li> <li>44% female</li> <li>60% PPO insurance</li> </ul>                                                                                                                                                                            | <ul style="list-style-type: none"> <li>Prescription copayment</li> <li>Required for a 30-d supply of imatinib</li> <li>88.5% paid any copayment (excluding deductible) for this supply</li> </ul>                                                                                                                                                                                                                                                                   |

(continued on next page)

Abbreviations: AI, aromatase inhibitor; ALL, acute lymphoblastic leukemia; AML, acute myeloid leukemia; BCCTP, Breast and Cervical Cancer Treatment Program; BCEI, Breast Cancer Education Intervention; BCS, breast-conserving surgery; CanCORS, (NCI) Cancer Care Outcomes Research and Surveillance; CCC, comprehensive cancer center; CCCWFO, Comprehensive Cancer Care—Wake Forest University; CLL, chronic lymphocytic leukemia; CML, chronic myeloid leukemia; Cohort-L, cohort-longitudinal; Cohort-P, cohort-prospective; Cohort-R, cohort-retrospective; COIN, Collection of Indirect and Nonmedical Direct Costs, modified for monthly OOP costs; COST, Comprehensive Score for financial Toxicity; CRC, colorectal cancer; CRN, cost-related medication nonadherence; CS, cross-sectional; CSS, Cancer Surveillance System; DCIS, ductal carcinoma in situ; EBC, early-stage breast cancer; ECSS, Experiences With Cancer Survivorship Supplement; GPH, general public hospital; HCT, hematopoietic cell transplantation; HMO, health maintenance organization; MBC, metastatic breast cancer; MCBS, Medicare Current Beneficiary Survey; MDS/MPN, myelodysplastic syndromes/myeloproliferative neoplasms; MEPS, Medical Expenditure Panel Survey; NHIS, National Health Interview Survey; NHL, non-Hodgkin's lymphoma; OOP, out-of-pocket; POS, point of service (insurance); PPO, preferred provider organization; VA, Veterans Administration.

**Table 2. Study and Patient Characteristics and Measures of Financial Toxicity Burdens (cont.)**

| Reference                         | Study Design | Setting/Data Source (Subjects, n)                                                           | Study Inclusion                                                                                                            | Participant Demographic                                                                                                                                                                                                                                                                           | Financial Toxicity Burden: Definition, Tool/Measure, Prevalence                                                                                                                                                                                                                                                                                                                                                                                                                                                                                                                                                                                                         |
|-----------------------------------|--------------|---------------------------------------------------------------------------------------------|----------------------------------------------------------------------------------------------------------------------------|---------------------------------------------------------------------------------------------------------------------------------------------------------------------------------------------------------------------------------------------------------------------------------------------------|-------------------------------------------------------------------------------------------------------------------------------------------------------------------------------------------------------------------------------------------------------------------------------------------------------------------------------------------------------------------------------------------------------------------------------------------------------------------------------------------------------------------------------------------------------------------------------------------------------------------------------------------------------------------------|
| Ekwueme et al, 2014 <sup>40</sup> | CS           | 2008–2011 MEPS and 2011 MEPS Cancer Survivorship Survey (n=6,722 and n=1,202, respectively) | <ul style="list-style-type: none"> <li>Cancer survivors (all sites) vs adults without cancer</li> </ul>                    | <ul style="list-style-type: none"> <li>18% aged ≥80 y</li> <li>58% female</li> <li>85% white, 7% black, 5% Hispanic, 3% other</li> <li>75% private insurance (age &lt;65 y), 55%–63% Medicare and private insurance (age ≥65 y)</li> </ul>                                                        | <ul style="list-style-type: none"> <li>Lost work productivity</li> <li>Employment disability (unable to work because of illness/injury); missed worked days, days spent in bed</li> </ul>                                                                                                                                                                                                                                                                                                                                                                                                                                                                               |
| Fenn et al, 2014 <sup>41</sup>    | CS           | NHIS 2010 data (n=2,108)                                                                    | <ul style="list-style-type: none"> <li>Diagnosis of cancer</li> <li>All sites</li> </ul>                                   | <ul style="list-style-type: none"> <li>53% aged 18–64 y, 47% aged ≥65 y</li> <li>56% female</li> <li>90% white, 7% black, 2% Asian</li> <li>51% Medicare, 37% private insurance</li> </ul>                                                                                                        | <ul style="list-style-type: none"> <li>Financial problems</li> <li>"To what degree has cancer caused financial problems for you and your family?": 9% reported "a lot," 12% reported "some," 10% reported "a little," 70% reported "not at all"</li> </ul>                                                                                                                                                                                                                                                                                                                                                                                                              |
| Jagsi et al, 2014 <sup>42</sup>   | Cohort-R     | SEER data for Los Angeles, CA, and Detroit, MI, survey, June 2005–February 2007 (n=746)     | <ul style="list-style-type: none"> <li>Age 20–64 y</li> <li>Diagnosis of stage 0–III nonrecurrent breast cancer</li> </ul> | <ul style="list-style-type: none"> <li>26% aged &lt;46 y, 42% aged 46–55 y, 33% aged ≥56 y</li> <li>42% white, 18% black, 38% Latina</li> <li>19% stage 0, 33% stage I, 37% stage II, 12% stage III</li> <li>61% chemotherapy, 61% BCS, 69% radiation</li> </ul>                                  | <ul style="list-style-type: none"> <li>Long-term work loss among those working at the time of diagnosis: 34% with 4-year unemployment; of those, 50% reported that it was important for them to work and 31% were actively seeking work</li> </ul>                                                                                                                                                                                                                                                                                                                                                                                                                      |
| Jagsi et al, 2014 <sup>43</sup>   | Cohort-R     | SEER data for Los Angeles, CA, and Detroit, MI, survey, June 2005–February 2007 (n=1,502)   | <ul style="list-style-type: none"> <li>Age 20–79 y</li> <li>Diagnosis of stage 0–III breast cancer</li> </ul>              | <ul style="list-style-type: none"> <li>21% aged &lt;46 y, 27% aged ≥65 y</li> <li>43% white, 17% black, 20% English-speaking Latina, 20% Spanish-speaking</li> <li>18% stage 0, 34% stage I, 33% stage II, 12% stage III</li> <li>52% chemotherapy, 62% BCS, 67% radiation</li> </ul>             | <ul style="list-style-type: none"> <li>Financial impact</li> <li>Financial decline: worse off financially since diagnosis (33% any decline)</li> <li>OOP (17% &gt;\$5,000)</li> <li>Medical debt 4 y after diagnosis (12%)</li> <li>Decline in employment status (15%)</li> </ul>                                                                                                                                                                                                                                                                                                                                                                                       |
| Khera et al, 2014 <sup>44</sup>   | CS           | Mayo Clinic in Arizona, Rochester, or Jacksonville, January 2006–June 2012 (n=268)          | <ul style="list-style-type: none"> <li>Received allogenic HCT</li> </ul>                                                   | <ul style="list-style-type: none"> <li>Median age, 55 y (range, 20–71 y)</li> <li>49% female</li> <li>92% non-Hispanic white, 5% nonwhite, 3% Hispanic</li> <li>59% private insurance, 26% Medicare + supplement, 7% Medicare only</li> <li>35% AML, 21% MDS/MPN, 17% NHL/CLL, 14% ALL</li> </ul> | <ul style="list-style-type: none"> <li>Subjective financial burden: overall 80%; being sick has hurt me financially (73% agreed); have to pay more than I can afford (33% agreed); medicines are too expensive (30% agreed); I have enough money to take care of my health (32% disagreed); I can pay my medical bills (22% disagreed); I can make enough money to pay for my healthcare (35% disagreed)</li> <li>Objective financial burden: overall 47%; household income decreased by more than 50% (26% reported yes); had to refinance/second mortgage home (8%); had to sell home (1%); declared bankruptcy (3%); withdrew money from retirement (25%)</li> </ul> |

(continued on next page)

Abbreviations: AI, aromatase inhibitor; ALL, acute lymphoblastic leukemia; AML, acute myeloid leukemia; BCCTP, Breast and Cervical Cancer Treatment Program; BCEI, Breast Cancer Education Intervention; BCS, breast-conserving surgery; CanCORS, (NCI) Cancer Care Outcomes Research and Surveillance; CCC, comprehensive cancer center; CCQWU, Comprehensive Cancer Care—Wake Forest University; CLL, chronic lymphocytic leukemia; CML, chronic myeloid leukemia; Cohort-L, cohort-longitudinal; Cohort-P, cohort-prospective; Cohort-R, cohort-retrospective; COIN, Collection of Indirect and Nonmedical Direct Costs, modified for monthly OOP costs; COST, Comprehensive Score for financial Toxicity; CRC, colorectal cancer; CRN, cost-related medication nonadherence; CS, cross-sectional; CSS, Cancer Surveillance System; DCIS, ductal carcinoma in situ; EBC, early-stage breast cancer; ECSS, Experiences With Cancer Survivorship Supplement; GPH, general public hospital; HCT, hematopoietic cell transplantation; HMO, health maintenance organization; MBC, metastatic breast cancer; MCBS, Medicare Current Beneficiary Survey; MDS/MPN, myelodysplastic syndromes/myeloproliferative neoplasms; MEPS, Medical Expenditure Panel Survey; NHIS, National Health Interview Survey; NHL, non-Hodgkin's lymphoma; OOP, out-of-pocket; POS, point of service (insurance); PPO, preferred provider organization; VA, Veterans Administration.

**eTable 2. Study and Patient Characteristics and Measures of Financial Toxicity Burdens (cont.)**

| Reference                            | Study Design | Setting/Data Source (Subjects, n)                                                                      | Study Inclusion                                                                                                                                                                                                                                                                                       | Participant Demographic                                                                                                                                                                                                                                                                                     | Financial Toxicity Burden: Definition, Tool/Measure, Prevalence                                                                                                                                                                                                                                                                                                                 |
|--------------------------------------|--------------|--------------------------------------------------------------------------------------------------------|-------------------------------------------------------------------------------------------------------------------------------------------------------------------------------------------------------------------------------------------------------------------------------------------------------|-------------------------------------------------------------------------------------------------------------------------------------------------------------------------------------------------------------------------------------------------------------------------------------------------------------|---------------------------------------------------------------------------------------------------------------------------------------------------------------------------------------------------------------------------------------------------------------------------------------------------------------------------------------------------------------------------------|
| Kircher et al, 2014 <sup>45</sup>    | CS           | MEPS data, 2002–2005 and 2007–2010 (n=6,607 [1,878 near-elderly, 4,729 with Medicare])                 | <ul style="list-style-type: none"> <li>Age <math>\geq 55</math> y</li> <li>Diagnosis of cancer</li> <li>All sites</li> </ul>                                                                                                                                                                          | <ul style="list-style-type: none"> <li>In Medicare group: mean age, 75.3 y; 46% female; 94% white, 4% black; 62% private insurance, 38% public insurance</li> <li>In near-elderly group: mean age, 59.1 y; 53% female; 92% white, 5% black; 91% private insurance, 1% public insurance</li> </ul>           | <ul style="list-style-type: none"> <li>OOP cost burden</li> <li>Direct payment for all prescription drugs</li> </ul>                                                                                                                                                                                                                                                            |
| Martin et al, 2014 <sup>46</sup>     | CS           | CanCORS Consortium, 2003 (n=5,044)                                                                     | <ul style="list-style-type: none"> <li>Diagnosis of lung cancer or CRC</li> <li><math>\approx 4</math> mo from diagnosis</li> </ul>                                                                                                                                                                   | <ul style="list-style-type: none"> <li>79% aged <math>&gt;55</math> y</li> <li>47% female</li> <li>74% white</li> <li>97% insured</li> </ul>                                                                                                                                                                | <ul style="list-style-type: none"> <li>Worry</li> <li>Treatment side effects (75%); cost of treatment (40%); time away from family (50%); time away from work (52%); transportation to treatment (22%)</li> </ul>                                                                                                                                                               |
| Regenbogen et al, 2014 <sup>47</sup> | CS           | SEER registry of metropolitan Detroit, MI, and of the state of Georgia, August 2011–March 2013 (n=937) | <ul style="list-style-type: none"> <li>Age <math>\geq 21</math> y</li> <li>Pathologic stage III colon or rectal cancer</li> <li>3–12 mo postsurgery</li> </ul>                                                                                                                                        | <ul style="list-style-type: none"> <li>16% aged <math>&lt;50</math> y, 37% aged 50–64 y, 23% aged 65–74 y, 24% aged <math>\geq 75</math> y</li> <li>46% female</li> <li>72% white, 22% black</li> <li>42% private insurance, 45% Medicare, 4% Medicaid</li> <li>85% had chemotherapy</li> </ul>             | <ul style="list-style-type: none"> <li>Personal financial burden: global financial burden (illness impacted my finances) (62%); financial worry measured using a Likert scale dichotomized later into “low” vs “high”</li> <li>Composite financial burden score range, 0–7; higher scores = increased financial burden; 62% endorsed no measures of financial burden</li> </ul> |
| Veenstra et al, 2014 <sup>48</sup>   | CS           | SEER registry of metropolitan Detroit, MI, and of the state of Georgia, August 2011–March 2013 (n=956) | <ul style="list-style-type: none"> <li>Age <math>\geq 21</math> y</li> <li>Pathologic stage III colon or rectal cancer</li> <li>3–12 mo postsurgery</li> </ul>                                                                                                                                        | <ul style="list-style-type: none"> <li>17% aged <math>&lt;50</math> y, 37% aged 50–64 y, 23% aged 65–74 y, 24% aged <math>&gt;75</math> y</li> <li>46% female</li> <li>71% white, 23% black</li> <li>38% Medicare, 33% employer insurance, 3% Medicaid</li> </ul>                                           | <ul style="list-style-type: none"> <li>Personal financial burden: global financial burden (illness impacted my finances) (61%); financial worry measured using a Likert scale dichotomized later into “low” vs “high”</li> <li>Mean financial burden score was <math>1.72 \pm 1.83</math> (range, 0–6; higher scores denoted increased financial burden)</li> </ul>             |
| Blinder et al, 2013 <sup>49</sup>    | Cohort-L     | California's BCCTP (n=274)                                                                             | <ul style="list-style-type: none"> <li><math>&gt;6</math> mo from diagnosis of stage 0–III breast cancer</li> <li>Curative treatment</li> <li>Not undergoing treatment</li> <li>Enrolled in BCCTP (family income <math>\leq 200\%</math> poverty level)</li> <li>English-/Spanish-speaking</li> </ul> | <ul style="list-style-type: none"> <li>Median age, 49 y (range, 26–85 y)</li> <li>53% Latina, 33% non-Latina, 14% other</li> <li>10% DCIS, 31% stage I, 44% stage II, 14% stage III</li> <li>39% mastectomy, 61% BCS, 16% reconstruction, 70% chemotherapy, 69% endocrine therapy, 73% radiation</li> </ul> | <ul style="list-style-type: none"> <li>Financial status</li> <li>Perceived adequacy of financial resources</li> <li>62% reported inadequacy of financial resources to meet needs</li> </ul>                                                                                                                                                                                     |

(continued on next page)

Abbreviations: AI, aromatase inhibitor; ALL, acute lymphoblastic leukemia; AML, acute myeloid leukemia; BCCTP, Breast and Cervical Cancer Treatment Program; BCEI, Breast Cancer Education Intervention; BCS, breast-conserving surgery; CanCORS, (NCI) Cancer Care Outcomes Research and Surveillance; CCC, comprehensive cancer center; CCCWFU, Comprehensive Cancer Care—Wake Forest University; CLL, chronic lymphocytic leukemia; CML, chronic myeloid leukemia; Cohort-L, cohort-longitudinal; Cohort-P, cohort-prospective; Cohort-R, cohort-retrospective; COIN, Collection of Indirect and Nonmedical/Direct Costs, modified for monthly OOP costs; COST, Comprehensive Score for financial Toxicity, CRC, colorectal cancer; CRN, cost-related medication nonadherence; CS, cross-sectional; CSS, Cancer Surveillance System; DCIS, ductal carcinoma in situ; EBC, early-stage breast cancer; ECSS, Experiences With Cancer Survivorship Supplement; GPH, general public hospital; HCT, hematopoietic cell transplantation; HMO, health maintenance organization; MBC, metastatic breast cancer; MCBS, Medicare Current Beneficiary Survey; MDS/MPN, myelodysplastic syndromes/myeloproliferative neoplasm; MEPS, Medical Expenditure Panel Survey; NHIS, National Health Interview Survey; NHL, non-Hodgkin's lymphoma; OOP, out-of-pocket; POS, point of service (insurance); PPO, preferred provider organization; VA, Veterans Administration.

e Table 2. Study and Patient Characteristics and Measures of Financial Toxicity Burdens (cont.)

| Reference                          | Study Design | Setting/Data Source (Subjects, n)                                           | Study Inclusion                                                                                                                                                                                                        | Participant Demographic                                                                                                                                                                                                          | Financial Toxicity Burden: Definition, Tool/Measure, Prevalence                                                                                                                                                                                                                                                                                                                                                                                                                                                                                               |
|------------------------------------|--------------|-----------------------------------------------------------------------------|------------------------------------------------------------------------------------------------------------------------------------------------------------------------------------------------------------------------|----------------------------------------------------------------------------------------------------------------------------------------------------------------------------------------------------------------------------------|---------------------------------------------------------------------------------------------------------------------------------------------------------------------------------------------------------------------------------------------------------------------------------------------------------------------------------------------------------------------------------------------------------------------------------------------------------------------------------------------------------------------------------------------------------------|
| Davidoff et al, 2013 <sup>50</sup> | CS           | MCBS, 1997–2007 (n=1,868)                                                   | <ul style="list-style-type: none"> <li>Diagnosis of cancer</li> <li>All sites</li> </ul>                                                                                                                               | <ul style="list-style-type: none"> <li>6% aged &lt;65 y</li> <li>49% female</li> <li>82% white, 9% black, 6% Hispanic</li> <li>37% private/employer insurance</li> <li>36% surgery, 22% radiation, 31% antineoplastic</li> </ul> | <ul style="list-style-type: none"> <li>Total OOP spending</li> <li>High spending was &gt;20% of income</li> <li>Total OOP/income: mean, 23.9 (median, 10) for patients with cancer</li> <li>OOP/income of &gt;10% among 50% of patients and &gt;20% among 28% of patients</li> </ul>                                                                                                                                                                                                                                                                          |
| Dowling et al, 2013 <sup>51</sup>  | CS           | MEPS survey, 2008–2010 (n=4,960)                                            | <ul style="list-style-type: none"> <li>Age ≥18 y</li> <li>Patients with cancer compared with adults without cancer</li> <li>All sites</li> </ul>                                                                       | <ul style="list-style-type: none"> <li>7% aged 18–39 y, 27% aged 40–59 y, 47% aged 60–79 y, 18% aged ≥80 y</li> <li>59% female</li> <li>85% non-Hispanic white, 7% black, 5% Hispanic, 3% other/multiple</li> </ul>              | <ul style="list-style-type: none"> <li>Lost productivity</li> <li>Lacked employment in past 12 mo (for age &lt;65 y) (25%); limitation at work, housework, or school (12%); inability to do any activities (7%); experienced cognitive limitations (6%)</li> </ul>                                                                                                                                                                                                                                                                                            |
| Goodwin et al, 2013 <sup>52</sup>  | CS           | Myeloma Institute for Research and Therapy (n=1,015)                        | <ul style="list-style-type: none"> <li>Diagnosis of multiple myeloma</li> </ul>                                                                                                                                        | <ul style="list-style-type: none"> <li>Mean age, 61 y (SD, 9.26)</li> <li>39% female</li> <li>90% white, 6% black, 1% Asian, 1% American Indian/Alaskan Native</li> <li>3% Hispanic/Latino</li> </ul>                            | <ul style="list-style-type: none"> <li>Financial effects of multiple myeloma: unemployment, disability, health/medical/life insurance, retirement or OOP expenses</li> <li>Burden of treatment costs/financial hardship: abrupt stoppage of insurance, inability to obtain other insurance, income spent on deductibles, copayments, prescriptions, healthcare, temporary travel, lodging (42% somewhat to very much of a burden)</li> <li>OOP expenses: 36% of income spent in first 12 mo of treatment and 28% during past 12 mo prior to survey</li> </ul> |
| Hamilton et al, 2013 <sup>53</sup> | CS           | Mount Sinai Medical Center and Hackensack University Medical Center (n=181) | <ul style="list-style-type: none"> <li>Age ≥18 y</li> <li>HCT within past 9–36 mo</li> <li>English-speaking</li> <li>With telephone access</li> <li>Not currently relapsed</li> <li>≥ moderately distressed</li> </ul> | <ul style="list-style-type: none"> <li>55% female</li> <li>87% white/non-Hispanic</li> <li>99.4% had insurance during transplant with 59% receiving full coverage and 36% &gt;half coverage of transplant costs</li> </ul>       | <ul style="list-style-type: none"> <li>Economic survivorship stressors</li> <li>Financial (reducing vacations, leisure activities, spending on food/clothing, delaying purchases); possible range of score: 0–8.1; mean, 1.81±1.85</li> <li>Employment (pay cut, loss of income, disability, leave of absence); possible range of score: 0–38; mean, 6.28±6.87;</li> <li>Insurance (time spent dealing with insurance company and insurance denying a payment); possible range of score: 0–20; mean, 3.43±4.68</li> </ul>                                     |

(continued on next page)

Abbreviations: AI, aromatase inhibitor; ALL, acute lymphoblastic leukemia; AML, acute myeloid leukemia; BCCTP, Breast and Cervical Cancer Treatment Program; BCEI, Breast Cancer Education Intervention; BCS, breast-conserving surgery; CanCORS, (NCI) Cancer Care Outcomes Research and Surveillance; CCC, comprehensive cancer center; CCCWU, Comprehensive Cancer Care—Wake Forest University; CLL, chronic lymphocytic leukemia; CML, chronic myeloid leukemia; Cohort-L, cohort-longitudinal; Cohort-P, cohort-prospective; Cohort-R, cohort-retrospective; COIN, Collection of Indirect and Nonmedical Direct Costs, modified for monthly OOP costs; COST, Comprehensive Score for financial Toxicity; CRC, colorectal cancer; CRN, cost-related medication nonadherence; CS, cross-sectional; CSS, Cancer Surveillance System; DCIS, ductal carcinoma in situ; EBC, early-stage breast cancer; ECSS, Experiences With Cancer Survivorship Supplement; GPH, general public hospital; HCT, hematopoietic cell transplantation; HMO, health maintenance organization; MBC, metastatic breast cancer; MCBS, Medicare Current Beneficiary Survey; MDS/MPN, myelodysplastic syndromes/myeloproliferative neoplasms; MEFS, Medical Expenditure Panel Survey; NHIS, National Health Interview Survey; NHL, non-Hodgkin's lymphoma; OOP, out-of-pocket; POS, point of service (insurance); PPO, preferred provider organization; VA, Veterans Administration.

**eTable 2. Study and Patient Characteristics and Measures of Financial Toxicity Burdens (cont.)**

| Reference                        | Study Design | Setting/Data Source (Subjects, n)                                                                               | Study Inclusion                                                                                                                                                       | Participant Demographic                                                                                                                                                                                                                                                                                                                   | Financial Toxicity Burden: Definition, Tool/Measure, Prevalence                                                                                                                                                                                                                                                                                                                                                                                                                                               |
|----------------------------------|--------------|-----------------------------------------------------------------------------------------------------------------|-----------------------------------------------------------------------------------------------------------------------------------------------------------------------|-------------------------------------------------------------------------------------------------------------------------------------------------------------------------------------------------------------------------------------------------------------------------------------------------------------------------------------------|---------------------------------------------------------------------------------------------------------------------------------------------------------------------------------------------------------------------------------------------------------------------------------------------------------------------------------------------------------------------------------------------------------------------------------------------------------------------------------------------------------------|
| Kent et al, 2013 <sup>54</sup>   | CS           | 2010 NHIS data with multistage sampling (n = 1,556)                                                             | <ul style="list-style-type: none"> <li>Diagnosis of cancer at age &gt;21 y</li> <li>All sites</li> </ul>                                                              | <ul style="list-style-type: none"> <li>51% aged 40–64 y, 30% aged ≥65 y</li> <li>58% female</li> <li>83% non-Hispanic white, 8% black, 6% Hispanic</li> </ul>                                                                                                                                                                             | <ul style="list-style-type: none"> <li>Cancer-related financial problems</li> <li>"To what degree has cancer caused financial problems for you and your family?"</li> <li>32% reported some cancer-related financial problems</li> </ul>                                                                                                                                                                                                                                                                      |
| Ramsey et al, 2013 <sup>55</sup> | Cohort-R     | SEER data, western Washington State linked with U.S. Bankruptcy Court, January 1995–December 2009 (n = 197,840) | <ul style="list-style-type: none"> <li>Age ≥21 y and &lt;90 y</li> <li>Diagnosis of cancer</li> <li>Not an in-situ stage</li> <li>All sites</li> </ul>                | <ul style="list-style-type: none"> <li>7% aged &lt;40 y, 49% aged 40–64 y, 44% aged ≥65 y</li> <li>50% female</li> <li>88% white, 12% nonwhite</li> <li>50% localized cancer, 22% regional cancer, 24% distant cancer, 4% unstaged cancer</li> </ul>                                                                                      | <ul style="list-style-type: none"> <li>Filing for bankruptcy (overall 2.2%)</li> <li>US Bankruptcy Code Chapter 7: debtors liquidate assets (bank accounts, investments, cars, homes) to pay creditors to get discharged from debts excluding child or spousal support and income tax (of those overall, 83% under this code).</li> <li>U.S. Bankruptcy Code Chapter 13: Debtors file for repayment plan to pay back debts and retain ownership of assets (of those overall, 17% under this code).</li> </ul> |
| Wan et al, 2013 <sup>56</sup>    | Cohort-R     | Marketscan commercial claims and encounters and health and productivity management databases (n = 571)          | <ul style="list-style-type: none"> <li>Age 18–64 y</li> <li>Diagnosis of breast cancer compared with adults without cancer</li> </ul>                                 | <ul style="list-style-type: none"> <li>Mean age, 49 ± 7 y</li> <li>47%–51% POS insurance, 8%–14% HMO, 36%–38% PPO</li> <li>76% EBC, 24% MBC</li> </ul>                                                                                                                                                                                    | <ul style="list-style-type: none"> <li>Indirect costs</li> <li>Paid time off including absenteeism (or sick leave)</li> <li>Short-term disability associated costs</li> </ul>                                                                                                                                                                                                                                                                                                                                 |
| Zafar et al, 2013 <sup>57</sup>  | Cohort-L     | Health Well Foundation and Duke University Medical Center, June 2010–May 2011 (n = 254)                         | <ul style="list-style-type: none"> <li>Diagnosis of solid tumor</li> <li>Receiving chemotherapy or endocrine therapy</li> <li>All sites</li> </ul>                    | <ul style="list-style-type: none"> <li>Mean age, 64 y</li> <li>86% female</li> <li>80% white, 13% black, 1% Asian</li> <li>59% Medicare, 81% drug coverage</li> <li>71% breast cancer diagnosis</li> <li>67% ≥12 mo chemotherapy</li> </ul>                                                                                               | <ul style="list-style-type: none"> <li>Financial burden</li> <li>Objective financial burden (OOP expenses)</li> <li>Subjective financial burden (patient self-report): 93% reported any burden, 33% reported significant burden, 9% reported catastrophic cancer-related financial burden from OOP expenses</li> </ul>                                                                                                                                                                                        |
| Zullig et al, 2013 <sup>58</sup> | CS           | Health Well Foundation and Duke University Medical Center, June 2010–May 2011 (n = 164)                         | <ul style="list-style-type: none"> <li>Age ≥21 y</li> <li>Diagnosis of solid tumor</li> <li>Receiving chemotherapy or endocrine therapy</li> <li>All sites</li> </ul> | <ul style="list-style-type: none"> <li>Mean age, 63–70 y</li> <li>97% female</li> <li>83% white, 10% black, 4% other</li> <li>78% prescription drug coverage, 73% Medicare/Medicaid, 16% employer insurance, 20% purchased insurance personally</li> <li>85% breast cancer, 4% CRC, 10% other</li> <li>72% ≥12 mo chemotherapy</li> </ul> | <ul style="list-style-type: none"> <li>Subjective financial distress</li> <li>5-point Likert scale: "not a financial burden at all" to "catastrophic financial burden"</li> <li>47% reported significant or catastrophic financial distress</li> </ul>                                                                                                                                                                                                                                                        |

(continued on next page)

Abbreviations: AI, aromatase inhibitor; ALL, acute lymphoblastic leukemia; AML, acute myeloid leukemia; BCCTP, Breast and Cervical Cancer Treatment Program; BCEI, Breast Cancer Education Intervention; BCS, breast-conserving surgery; CanCORS, (NCI) Cancer Care Outcomes Research and Surveillance; CCC, comprehensive cancer center; CCCWU, Comprehensive Cancer Care—Wake Forest University; CLL, chronic lymphocytic leukemia; CML, chronic myeloid leukemia; Cohort-L, cohort-longitudinal; Cohort-P, cohort-prospective; Cohort-R, cohort-retrospective; COIN, Collection of Indirect and Nonmedical Direct Costs, modified for monthly OOP costs; COST, Comprehensive Score for Financial Toxicity; CRC, colorectal cancer; CRN, cost-related medication nonadherence; CS, cross-sectional; CSS, Cancer Surveillance System; DCIS, ductal carcinoma in situ; EBC, early-stage breast cancer; ECSS, Experiences With Cancer Survivorship Supplement; GPH, general public hospital; HCT, hematopoietic cell transplantation; HMO, health maintenance organization; MBC, metastatic breast cancer; MCBS, Medicare Current Beneficiary Survey; MDS/MPN, myelodysplastic syndromes/myeloproliferative neoplasms; MEPS, Medical Expenditure Panel Survey; NHIS, National Health Interview Survey; NHL, non-Hodgkin's lymphoma; OOP, out-of-pocket; POS, point of service (insurance); PPO, preferred provider organization; VA, Veterans Administration.

**eTable 2. Study and Patient Characteristics and Measures of Financial Toxicity Burdens (cont.)**

| Reference                           | Study Design | Setting/Data Source (Subjects, n)                                              | Study Inclusion                                                                                                                                                                                                         | Participant Demographic                                                                                                                                                           | Financial Toxicity Burden: Definition, Tool/Measure, Prevalence                                                                                                                                                                                                                                                                                                                                                                                                                                                                                                        |
|-------------------------------------|--------------|--------------------------------------------------------------------------------|-------------------------------------------------------------------------------------------------------------------------------------------------------------------------------------------------------------------------|-----------------------------------------------------------------------------------------------------------------------------------------------------------------------------------|------------------------------------------------------------------------------------------------------------------------------------------------------------------------------------------------------------------------------------------------------------------------------------------------------------------------------------------------------------------------------------------------------------------------------------------------------------------------------------------------------------------------------------------------------------------------|
| Meneses et al, 2012 <sup>59</sup>   | Cohort-L     | BCEI study (n=132)                                                             | <ul style="list-style-type: none"> <li>• Age ≥21 y</li> <li>• Stage 0-III breast cancer</li> <li>• &lt;2 y from diagnosis</li> <li>• &gt;1 mo since initial treatment</li> <li>• No recurrence or metastasis</li> </ul> | <ul style="list-style-type: none"> <li>• 58% aged 46-65 y, 22% aged 66-83 y</li> <li>• 81% Caucasian</li> <li>• 57% stage I</li> </ul>                                            | <ul style="list-style-type: none"> <li>• Economic burden</li> <li>• BCEI survey (at 3 mo, 6 mo)</li> <li>• Work changes in motivation, productivity, quality, quantity: 17%-38%</li> <li>• Financial hardship (changes in income, applying for unemployment benefits, finding second jobs, selling property, borrowing money, using savings, declaring bankruptcy, changing economic lifestyle, missing bill payments, increase in insurance premiums, or reaching coverage limits): 2%-46%, most common change in income</li> <li>• Increased OOP expenses</li> </ul> |
| Shankaran et al, 2012 <sup>60</sup> | CS           | CSS subset of SEER, January 2008-March 2010 (n=284)                            | <ul style="list-style-type: none"> <li>• Age ≥18 y</li> <li>• Stage III colon cancer</li> </ul>                                                                                                                         | <ul style="list-style-type: none"> <li>• Mean age, 60 y (range, 22-86 y)</li> <li>• 49% female</li> <li>• 84% white</li> </ul>                                                    | <ul style="list-style-type: none"> <li>• Perceived financial burden</li> <li>• Associated with employment, income, insurance, copayments, deductibles, monthly expenses. Self-report history of selling, refinancing, second mortgage, debt, borrowing, or ≥20% income decline.</li> <li>• 38% reported ≥1 treatment-related financial burden; 23% reported debt</li> </ul>                                                                                                                                                                                            |
| Bernard et al, 2011 <sup>61</sup>   | CS           | MEPS—household component data, 2001-2008 (n=4,110)                             | <ul style="list-style-type: none"> <li>• Diagnosis of cancer</li> <li>• Receiving treatment</li> <li>• All sites</li> </ul>                                                                                             | <ul style="list-style-type: none"> <li>• 49% aged 55-64 y</li> <li>• 62% female</li> </ul>                                                                                        | <ul style="list-style-type: none"> <li>• OOP healthcare expenditure burden</li> <li>• High burden = health-related spending ≥20% of income (13%)</li> </ul>                                                                                                                                                                                                                                                                                                                                                                                                            |
| Streeter et al, 2011 <sup>62</sup>  | CS           | Wolters Kluwer Dynamic Lifecycle Database, 2007-2009 (n=10,508)                | <ul style="list-style-type: none"> <li>• Initiated with oral oncolytic therapy</li> <li>• All sites</li> </ul>                                                                                                          | <ul style="list-style-type: none"> <li>• 49% aged 41-65 y, 37% aged 65-80 y, 12% aged &gt;81 y</li> <li>• 53% female</li> <li>• 84% commercial insurance, 17% Medicare</li> </ul> | <ul style="list-style-type: none"> <li>• Cost burden</li> <li>• Associated with insurance plan, cost-sharing requirements, income, concurrent prescription activity</li> <li>• 73% had cost sharing \$0-\$100; 16% had cost sharing &gt;\$500</li> </ul>                                                                                                                                                                                                                                                                                                               |
| Neugut et al, 2011 <sup>63</sup>    | Cohort-R     | Claims data from Medco Health Solutions, January 2007-December 2008 (n=22,160) | <ul style="list-style-type: none"> <li>• Age ≥50 y</li> <li>• EBC</li> <li>• Lumpectomy or mastectomy within 12 mo of AI initiation</li> </ul>                                                                          | <ul style="list-style-type: none"> <li>• 24% aged 50-59 y, 35% aged 60-69 y, 28% aged 70-79 y, 13% aged ≥80 y</li> <li>• 90% white/other, 5% black, 3% Hispanic</li> </ul>        | <ul style="list-style-type: none"> <li>• Financial factors</li> <li>• Copayments (the amount paid by a subscriber for a 90-d mail-order prescription) ≥\$90 (30%)</li> </ul>                                                                                                                                                                                                                                                                                                                                                                                           |

(continued on next page)

Abbreviations: AI, aromatase inhibitor; ALL, acute lymphoblastic leukemia; AML, acute myeloid leukemia; BCCTP, Breast and Cervical Cancer Treatment Program; BCEI, Breast Cancer Education Intervention; BCS, breast-conserving surgery; CanCORS, (NCI) Cancer Care Outcomes Research and Surveillance; CCC, comprehensive cancer center; CCGW/FU, Comprehensive Cancer Care—Wake Forest University; CLL, chronic lymphocytic leukemia; CML, chronic myeloid leukemia; Cohort-L, cohort-longitudinal; Cohort-P, cohort-prospective; Cohort-R, cohort-retrospective; COIN, Collection of Indirect and Nonmedical Direct Costs, modified for monthly OOP costs; COST, Comprehensive Score for financial Toxicity; CRC, colorectal cancer; CRN, cost-related medication nonadherence; CS, cross-sectional; CSS, Cancer Surveillance System; DCIS, ductal carcinoma in situ; EBC, early-stage breast cancer; ECSS, Experiences With Cancer Survivorship Supplement; GPH, general public hospital; HCT, hematopoietic cell transplantation; HMO, health maintenance organization; MBC, metastatic breast cancer; MCBS, Medicare Current Beneficiary Survey; MDS/MPN, myelodysplastic syndromes/myeloproliferative neoplasms; MEPS, Medical Expenditure Panel Survey; NHL, National Health Interview Survey; NHL, non-Hodgkin's lymphoma; OOP, out-of-pocket; POS, point of service (insurance); PPO, preferred provider organization; VA, Veterans Administration.

**eTable 2. Study and Patient Characteristics and Measures of Financial Toxicity Burdens (cont.)**

| Reference                          | Study Design | Setting/Data Source (Subjects, n)                                              | Study Inclusion                                                                                                                                    | Participant Demographic                                                                                                                                                                                              | Financial Toxicity Burden: Definition, Tool/Measure, Prevalence                                                                                                                                                                                                                                                                                                                                                                                                                 |
|------------------------------------|--------------|--------------------------------------------------------------------------------|----------------------------------------------------------------------------------------------------------------------------------------------------|----------------------------------------------------------------------------------------------------------------------------------------------------------------------------------------------------------------------|---------------------------------------------------------------------------------------------------------------------------------------------------------------------------------------------------------------------------------------------------------------------------------------------------------------------------------------------------------------------------------------------------------------------------------------------------------------------------------|
| de Moor et al, 2010 <sup>64</sup>  | CS           | Dana-Farber Cancer Institute/Harvard Cancer Center Rapid Case Registry (n=487) | <ul style="list-style-type: none"> <li>Newly diagnosed DCIS</li> <li>≤3 mo from surgery</li> <li>Fluent in English/Spanish</li> </ul>              | <ul style="list-style-type: none"> <li>Mean age, 54.4±11.02 y</li> <li>94% white</li> <li>30% mastectomy, 50% radiation</li> </ul>                                                                                   | <ul style="list-style-type: none"> <li>Financial status</li> <li>"How would you describe your household's financial situation right now?" measured in level of difficulty experienced with paying bills</li> <li>70% high financial status (have money for special things), 18% medium status (little spare money to buy extra or special things), 12% low status (able to pay bills but need to cut back on other things or difficulty paying bills no matter what)</li> </ul> |
| Khera et al, 2011 <sup>65</sup>    | CS           | Fried Hutchinson Cancer Research Center (n=1,549)                              | <ul style="list-style-type: none"> <li>Age &gt; 18 y</li> <li>Survived ≥2 y after HCT</li> <li>All sites</li> </ul>                                | <ul style="list-style-type: none"> <li>Median age, 54.9 y (range, 18.2–81.8 y)</li> <li>49% female</li> <li>95% white, 2% Hispanic/Latino</li> <li>28% chronic leukemia, 23% acute leukemia, 18% lymphoma</li> </ul> | <ul style="list-style-type: none"> <li>Concerns about medical costs</li> <li>Coverage, lifetime cap, bankruptcy</li> <li>25% worried that expenses will reach the limit and insurance will not pay, 1% reached the limit, 3% filed for bankruptcy</li> </ul>                                                                                                                                                                                                                    |
| Markman & Luce, 2010 <sup>66</sup> | CS           | NexCura cancer decision-support program by American Cancer Society (n=1,767)   | <ul style="list-style-type: none"> <li>Diagnosis of cancer of breast, colon, lung, or prostate</li> </ul>                                          | <ul style="list-style-type: none"> <li>2% aged &gt;60 y</li> <li>58% female</li> <li>22% Medicare, 25% HMO insurance, 4% Medicaid</li> </ul>                                                                         | <ul style="list-style-type: none"> <li>Financial impact of cancer treatment</li> <li>Self-reported financial (income, OOP) and subjective (distress-associated) impact</li> <li>64% of all patients had "any distress"; 19% of all patients and 39% of those with &lt;\$40,000/y income reported "large amount of distress" with financial costs (none, small amount, large amount)</li> </ul>                                                                                  |
| Weaver et al, 2010 <sup>67</sup>   | CS           | NHIS, 2003–2006 (n=6,602)                                                      | <ul style="list-style-type: none"> <li>Age ≥ 18 y</li> <li>History of cancer</li> <li>All sites</li> </ul>                                         | <ul style="list-style-type: none"> <li>48% aged 18–64 y, 52% aged ≥65 y</li> <li>64% female</li> <li>82% white, 10% black, 8% Hispanic</li> <li>63% private insurance, 30% public insurance, 7% uninsured</li> </ul> | <ul style="list-style-type: none"> <li>Cost-driven healthcare access</li> <li>Ever had to forgo, delay, or not adhere to recommended treatment due to cost</li> </ul>                                                                                                                                                                                                                                                                                                           |
| Pezzin et al, 2009 <sup>68</sup>   | CS           | Population-based cohort of elderly patients with breast cancer (n=1,890)       | <ul style="list-style-type: none"> <li>Age ≥ 65 y</li> <li>Received adjuvant hormone therapy in first 12 mo post-breast surgery in 2003</li> </ul> | <ul style="list-style-type: none"> <li>34% aged 65–69 y, 33% aged 70–74 y, 23% aged 75–79 y, 11% aged ≥80 y</li> <li>90% white, 3% black, 4% Hispanic</li> <li>45% had full prescription drug coverage</li> </ul>    | <ul style="list-style-type: none"> <li>Health-related financial problems</li> <li>Self-reported difficulty in paying medical bills, including breast cancer-specific prescriptions in past 12 mo ("somewhat" and "very difficult" = financial problems)</li> <li>Any financial difficulty (31%–37%)</li> </ul>                                                                                                                                                                  |

(continued on next page)

Abbreviations: AI, aromatase inhibitor; ALL, acute lymphoblastic leukemia; AML, acute myeloid leukemia; BCCTP, Breast and Cervical Cancer Treatment Program; BCEI, Breast Cancer Education Intervention; BCS, breast-conserving surgery; CanCORS, (NCI) Cancer Care Outcomes Research and Surveillance; CCC, comprehensive cancer center; CCCWFU, Comprehensive Cancer Care—Wake Forest University; CLL, chronic lymphocytic leukemia; CML, chronic myeloid leukemia; Cohort-L, cohort-longitudinal; Cohort-P, cohort-prospective; Cohort-R, cohort-retrospective; COIN, Collection of Indirect and Nonmedical Direct Costs, modified for monthly OOP costs; COST, Comprehensive Score for financial Toxicity; CRC, colorectal cancer; CRN, cost-related medication nonadherence; CS, cross-sectional; CSS, Cancer Surveillance System; DCIS, ductal carcinoma in situ; EBC, early-stage breast cancer; ECSS, Experiences With Cancer Survivorship Supplement; GPH, general public hospital; HCT, hematopoietic cell transplantation; HMO, health maintenance organization; MBC, metastatic breast cancer; MGBS, Medicare Current Beneficiary Survey; MDS/MPN, myelodysplastic syndromes/myeloproliferative neoplasms; MEPS, Medical Expenditure Panel Survey; NHIS, National Health Interview Survey; NHL, non-Hodgkin's lymphoma; OOP, out-of-pocket; POS, point of service (insurance); PPO, preferred provider organization; VA, Veterans Administration.

**Table 2. Study and Patient Characteristics and Measures of Financial Toxicity Burdens (cont.)**

| Reference                       | Study Design | Setting/Data Source (Subjects, n)                                                         | Study Inclusion                                                                                                                                                                                                                             | Participant Demographic                                                                                                                                                                                                                                                                                                      | Financial Toxicity Burden: Definition, Tool/Measure, Prevalence                                                                                                                                                                                                                                                                                                                                                                                                                                                                                  |
|---------------------------------|--------------|-------------------------------------------------------------------------------------------|---------------------------------------------------------------------------------------------------------------------------------------------------------------------------------------------------------------------------------------------|------------------------------------------------------------------------------------------------------------------------------------------------------------------------------------------------------------------------------------------------------------------------------------------------------------------------------|--------------------------------------------------------------------------------------------------------------------------------------------------------------------------------------------------------------------------------------------------------------------------------------------------------------------------------------------------------------------------------------------------------------------------------------------------------------------------------------------------------------------------------------------------|
| Ell et al, 2008 <sup>69</sup>   | Cohort-L     | Outpatient oncology clinic associated with University of Southern California (n=487)      | <ul style="list-style-type: none"> <li>Breast or gynecologic cancer</li> <li>Oversampled Hispanic women with low income</li> <li>Participants in IMPAACT trial</li> <li>In active treatment/follow-up</li> </ul>                            | <ul style="list-style-type: none"> <li>53% aged &gt;50 y</li> <li>76% Latina, 12% Asian, 7% non-Hispanic white, 6% black</li> <li>40% Medi-Cal/Medicare, 32% government care program, 24% uninsured</li> <li>49% breast cancer, 51% gynecologic cancer, 30% stage III/IV/recurrent</li> </ul>                                | <ul style="list-style-type: none"> <li>Economic stress: at baseline, 6 mo, and 12 mo</li> <li>Unemployment (baseline 70%); cost concern about hospitalization, chemotherapy, radiation, medicines, or inability to pay for prescriptions (68%); wages lost for sick time or attending a medical appointment (47%)</li> <li>Financial stress: at 12 mo (overall 49%)</li> <li>Yes if economic situation worsened over past year, not satisfied with current economic situation, or not hopeful for better economic situation in future</li> </ul> |
| Gupta et al, 2007 <sup>70</sup> | CS           | Cancer Treatment Centers of America patient case series, April 2001–November 2004 (n=954) | <ul style="list-style-type: none"> <li>Diagnosis of cancer</li> <li>All sites</li> </ul>                                                                                                                                                    | <ul style="list-style-type: none"> <li>Median age, 56 y (range, 20–90 y)</li> <li>61% female</li> <li>26% breast cancer, 19% CRC, 16% lung cancer, 6% pancreatic cancer, 5% prostate cancer, 29% other cancer</li> <li>9% stage I, 19% stage II, 20% stage III, 31% stage IV, 21% stage unknown</li> </ul>                   | <ul style="list-style-type: none"> <li>Perceived financial difficulty</li> <li>OLO-C30 tool: "Has your physical condition or medical treatment caused you financial difficulties?"</li> <li>31% "not at all"; 38% "a little"; 16% "quite a bit"; 15% "very much"</li> </ul>                                                                                                                                                                                                                                                                      |
| Francoeur, 2005 <sup>71</sup>   | CS           | Northeastern United States, 1992–1993 (n=268)                                             | <ul style="list-style-type: none"> <li>Age <math>\geq</math> 30 y</li> <li>Diagnosis of recurrent cancer</li> <li>Not receiving treatment</li> <li>Not terminally ill, expected to live <math>\geq</math> 1 y</li> <li>All sites</li> </ul> | <ul style="list-style-type: none"> <li>Mean age, 62 y (range, 30–90 y)</li> <li>50% female</li> <li>88% Caucasian</li> <li>22% breast cancer, 20% lung cancer, 14% head and neck cancer, 10% gynecologic cancer, 9% prostate cancer</li> <li>61% surgery, 31% radiation, 8% surgery + radiation, 34% chemotherapy</li> </ul> | <ul style="list-style-type: none"> <li>Objective Family Financial Stress Index</li> <li>OOP expenses adjusted for family size and income; objective financial stress due to medical bills; extent of wages lost; diversity of resources tapped due to illness; change in employment; overall financial trend</li> <li>Subjective patient perceptions of financial strain</li> <li>Difficulty paying bills, inadequacy of insurance, worry about expenses</li> </ul>                                                                              |
| Langa et al, 2004 <sup>72</sup> | CS           | National Health and Retirement study, 1995 (n=988)                                        | <ul style="list-style-type: none"> <li>Patient with active or prior cancer compared with adults without cancer</li> <li>All sites</li> </ul>                                                                                                | <ul style="list-style-type: none"> <li>Mean age, 80 y</li> <li>43%–56% female</li> <li>94% white, 5% black</li> <li>99% Medicare</li> </ul>                                                                                                                                                                                  | <ul style="list-style-type: none"> <li>OOP expenditures</li> <li>Hospital and nursing home stay; outpatient services such as doctor visits, dental visits, or surgery; home care, community special services; prescriptions</li> <li>Adjusted mean total OOP expenditures for: cancer, no active treatment: \$1,560; and cancer, active treatment: \$2,100</li> </ul>                                                                                                                                                                            |

(continued on next page)

Abbreviations: AI, aromatase inhibitor; ALL, acute lymphoblastic leukemia; AML, acute myeloid leukemia; BCCTP, Breast and Cervical Cancer Treatment Program; BCEI, Breast Cancer Education Intervention; BCS, breast-conserving surgery; CanCORS, (NCI) Cancer Care Outcomes Research and Surveillance; CCC, comprehensive cancer center; CCCW/FU, Comprehensive Cancer Care—Wake Forest University; CLL, chronic lymphocytic leukemia; CML, chronic myeloid leukemia; Cohort-L, cohort-longitudinal; Cohort-P, cohort-prospective; Cohort-R, cohort-retrospective; COIN, Collection of Indirect and Nonmedical Direct Costs, modified for monthly OOP costs; COST, Comprehensive Score for financial Toxicity; CRC, colorectal cancer; CRN, cost-related medication nonadherence; CS, cross-sectional; CSS, Cancer Surveillance System; DCIS, ductal carcinoma in situ; EBC, early-stage breast cancer; ECSS, Experiences With Cancer Survivorship Supplement; GPH, general public hospital; HCT, hematopoietic cell transplantation; HMO, health maintenance organization; MBC, metastatic breast cancer; MCBS, Medicare Current Beneficiary Survey; MDS/MPN, myelodysplastic syndromes/myeloproliferative neoplasms; MEFS, Medical Expenditure Panel Survey; NHIS, National Health Interview Survey; NHL, non-Hodgkin's lymphoma; OOP, out-of-pocket; POS, point of service (insurance); PPO, preferred provider organization; VA, Veterans Administration.



**eTable 2. Study and Patient Characteristics and Measures of Financial Toxicity Burdens (cont.)**

| Reference                       | Study Design | Setting/Data Source (Subjects, n)                                               | Study Inclusion                                                                                                               | Participant Demographic                                                                                                                                                                              | Financial Toxicity Burden: Definition, Tool/Measure, Prevalence                                                                                                                                                                                                                                                                                                                                                                                                                         |
|---------------------------------|--------------|---------------------------------------------------------------------------------|-------------------------------------------------------------------------------------------------------------------------------|------------------------------------------------------------------------------------------------------------------------------------------------------------------------------------------------------|-----------------------------------------------------------------------------------------------------------------------------------------------------------------------------------------------------------------------------------------------------------------------------------------------------------------------------------------------------------------------------------------------------------------------------------------------------------------------------------------|
| Smith et al, 2003 <sup>33</sup> | Cohort-R     | Academic tertiary referral center (n=101)                                       | <ul style="list-style-type: none"> <li>Diagnosis of glottis cancer</li> <li>Lesion ranging from Tis to invasive T1</li> </ul> | <ul style="list-style-type: none"> <li>73% surgery, 27% radiation</li> <li>22% Tis, 78% T1 lesion</li> </ul>                                                                                         | <ul style="list-style-type: none"> <li>Nontangible costs of treatment</li> <li>Hidden-cost questionnaire</li> <li>Travel time, travel distance, treatment time, amount of work missed by patient and friends of family members</li> </ul>                                                                                                                                                                                                                                               |
| Houts et al, 1985 <sup>44</sup> | CS           | 9 medical practices affiliated with Central Pennsylvania Oncology Group (n=185) | <ul style="list-style-type: none"> <li>Diagnosis of cancer</li> <li>&gt;6 mo from diagnosis</li> <li>All sites</li> </ul>     | <ul style="list-style-type: none"> <li>Median age, 57 y (range, 16–76 y)</li> <li>70% female</li> <li>40% breast cancer, 37% other cancer</li> <li>36% curative treatment, 64% palliation</li> </ul> | <ul style="list-style-type: none"> <li>Financial burden</li> <li>medical costs; OOP expenses (transportation, lodging, food, nonmedical healing, nonprescription drugs, clothing, telephone calls, miscellaneous); wages lost; total costs; % income lost</li> <li>Of total financial burden incurred, 50% from wages lost, 25% OOP expenses, and 25% included medical expenses from being uninsured</li> <li>Mean % of family income lost: 16%; median, 7% (range, 0%–134%)</li> </ul> |

(references on next page)

Abbreviations: AI, aromatase inhibitor; ALL, acute lymphoblastic leukemia; AML, acute myeloid leukemia; BCCTP, Breast and Cervical Cancer Treatment Program; BCEI, Breast Cancer Education Intervention; BCS, breast-conserving surgery; CanCORS, (NCI) Cancer Care Outcomes Research and Surveillance; CCC, comprehensive cancer center; CCCWFU, Comprehensive Cancer Care—Wake Forest University; CLL, chronic lymphocytic leukemia; CML, chronic myeloid leukemia; Cohort-L, cohort-longitudinal; Cohort-P, cohort-prospective; Cohort-R, cohort-retrospective; COIN, Collection of Indirect and Nonmedical Direct Costs, modified for monthly OOP costs; COST, Comprehensive Score for financial Toxicity; CRC, colorectal cancer; CRN, cost-related medication nonadherence; CS, cross-sectional; CSS, Cancer Surveillance System; DCIS, ductal carcinoma in situ; EBC, early-stage breast cancer; ECSS, Experiences With Cancer Survivorship Supplement; GPH, general public hospital; HCT, hematopoietic cell transplantation; HMO, health maintenance organization; MBC, metastatic breast cancer; MCBBS, Medicare Current Beneficiary Survey; MDS/MPN, myelodysplastic syndromes/myeloproliferative neoplasm; MEPS, Medical Expenditure Panel Survey; NHIS, National Health Interview Survey; NHL, non-Hodgkin's lymphoma; OOP, out-of-pocket; POS, point of service (insurance); PPO, preferred provider organization; VA, Veterans Administration.

## eTable 2. Study and Patient Characteristics and Measures of Financial Toxicity Burdens (cont.)

### References

- Shankaran V, Leahy T, Steelquist J, et al. Pilot feasibility study of an oncology financial navigation program. *J Oncol Pract* 2018;14:e122-129.
- Wheeler SB, Spencer JC, Pinheiro LC, et al. Financial impact of breast cancer in black versus white women. *J Clin Oncol* 2018;36:1695-1701.
- de Souza JA, Kung S, O'Connor J, et al. Determinants of patient-centered financial stress in patients with locally advanced head and neck cancer. *J Oncol Pract* 2017;13:e310-318.
- de Souza JA, Yap BJ, Wroblewski K, et al. Measuring financial toxicity as a clinically relevant patient-reported outcome: the validation of the Comprehensive Score for financial Toxicity (COST). *Cancer* 2017;123:476-484.
- Farias AJ, Du XL. Association between out-of-pocket costs, race/ethnicity, and adjuvant endocrine therapy adherence among Medicare patients with breast cancer. *J Clin Oncol* 2017;35:86-95.
- Meeker CR, Wong YN, Egleston BL, et al. Distress and financial distress in adults with cancer: an age-based analysis. *J Natl Compr Canc Netw* 2017;15:1224-1233.
- Pisu M, Azuero A, Benz R, et al. Out-of-pocket costs and burden among rural breast cancer survivors. *Cancer Med* 2017;6:572-581.
- Abel GA, Albelda R, Khera N, et al. Financial hardship and patient-reported outcomes after hematopoietic cell transplantation. *Biol Blood Marrow Transplant* 2016;22:1504-1510.
- Banegas MP, Guy GP Jr, de Moor JS, et al. For working-age cancer survivors, medical debt and bankruptcy create financial hardships. *Health Aff (Millwood)* 2016;35:54-61.
- Chongpison Y, Hornbrook MC, Harris RB, et al. Self-reported depression and perceived financial burden among long-term rectal cancer survivors. *Psychooncology* 2016;25:1350-1356.
- Delgado-Guay MO, Chisholm G, Williams J, et al. Frequency, intensity, and correlates of spiritual pain in advanced cancer patients assessed in a supportive/palliative care clinic. *Palliat Support Care* 2016;14:341-348.
- DiMartino LD, Birken SA, Mayer DK. The relationship between cancer survivors' socioeconomic status and reports of follow-up care discussions with providers. *J Cancer Educ* 2017;32:749-755.
- Farias AJ, Hansen RN, Zeliadt SB, et al. The association between out-of-pocket costs and adherence to adjuvant endocrine therapy among newly diagnosed breast cancer patients. *Am J Clin Oncol* 2018;41:708-715.
- Kale HP, Carroll NV. Self-reported financial burden of cancer care and its effect on physical and mental health-related quality of life among US cancer survivors. *Cancer* 2016;122:283-289.
- Keim-Malpass J, Levine B, Danhauer SC, et al. Work-related perceptions and quality of life among breast cancer survivors. *Psychooncology* 2016;25:873-876.
- Lathan CS, Cronin A, Tucker-Seeley R, et al. Association of financial strain with symptom burden and quality of life for patients with lung or colorectal cancer. *J Clin Oncol* 2016;34:1732-1740.
- Lee M, Khan MM. Gender differences in cost-related medication non-adherence among cancer survivors. *J Cancer Surviv* 2016;10:384-393.
- Lee M, Salloum RG. Racial and ethnic disparities in cost-related medication non-adherence among cancer survivors. *J Cancer Surviv* 2016;10:534-544.
- Meeker CR, Geynisman DM, Egleston BL, et al. Relationships among financial distress, emotional distress, and overall distress in insured patients with cancer. *J Oncol Pract* 2016;12:e755-764.
- Narang AK, Nicholas LH. Out-of-pocket spending and financial burden among Medicare beneficiaries with cancer. *JAMA Oncol* 2017;3:757-765.
- Nipp RD, Zullig LL, Samsa G, et al. Identifying cancer patients who alter care or lifestyle due to treatment-related financial distress. *Psychooncology* 2016;25:719-725.
- Ramsey SD, Bansal A, Fedorenko CR, et al. Financial insolvency as a risk factor for early mortality among patients with cancer. *J Clin Oncol* 2016;34:980-986.
- Whitney RL, Bell JF, Reed SC, et al. Predictors of financial difficulties and work modifications among cancer survivors in the United States. *J Cancer Surviv* 2016;10:241-250.
- Wong YN, Schluchter MD, Albrecht TL, et al. Financial concerns about participation in clinical trials among patients with cancer. *J Clin Oncol* 2016;34:479-487.
- Yabroff KR, Dowling EC, Guy GP Jr, et al. Financial hardship associated with cancer in the United States: findings from a population-based sample of adult cancer survivors. *J Clin Oncol* 2016;34:259-267.
- Zheng Z, Yabroff KR, Guy GP Jr, et al. Annual medical expenditure and productivity loss among colorectal, female breast, and prostate cancer survivors in the United States. *J Natl Cancer Inst* 2015;108:djv382.
- Callahan C, Brintzenhofesoc K. Financial quality of life for patients with cancer: an exploratory study. *J Psychosoc Oncol* 2015;33:377-394.
- Delgado-Guay M, Ferrer J, Rieber AG, et al. Financial distress and its associations with physical and emotional symptoms and quality of life among advanced cancer patients. *Oncologist* 2015;20:1092-1098.
- Guy GP Jr, Yabroff KR, Ekwueme DU, et al. Healthcare expenditure burden among non-elderly cancer survivors, 2008-2012. *Am J Prev Med* 2015;49(Suppl 5):S489-497.
- Huntington SF, Weiss BM, Vogl DT, et al. Financial toxicity in insured patients with multiple myeloma: a cross-sectional pilot study. *Lancet Haematol* 2015;2:e408-416.
- Jones WC, Parry C, Devine S, et al. Prevalence and predictors of distress in posttreatment adult leukemia and lymphoma survivors. *J Psychosoc Oncol* 2015;33:124-141.
- Palmer NR, Weaver KE, Hauser SP, et al. Disparities in barriers to follow-up care between African American and White breast cancer survivors. *Support Care Cancer* 2015;23:3201-3209.
- Pisu M, Kenzik KM, Oster RA, et al. Economic hardship of minority and non-minority cancer survivors 1 year after diagnosis: another long-term effect of cancer? *Cancer* 2015;121:1257-1264.
- Tucker-Seeley RD, Abel GA, Uno H, et al. Financial hardship and the intensity of medical care received near death. *Psychooncology* 2015;24:572-578.
- Zafar SY, McNeil RB, Thomas CM, et al. Population-based assessment of cancer survivors' financial burden and quality of life: a prospective cohort study. *J Oncol Pract* 2015;11:145-150.
- Bender CM, Gentry AL, Brufsky AM, et al. Influence of patient and treatment factors on adherence to adjuvant endocrine therapy in breast cancer. *Oncol Nurs Forum* 2014;41:274-285.
- Bestvina CM, Zullig LL, Rushing C, et al. Patient-oncologist cost communication, financial distress, and medication adherence. *J Oncol Pract* 2014;10:162-167.
- de Souza JA, Yap BJ, Hlubocky FJ, et al. The development of a financial toxicity patient-reported outcome in cancer: the COST measure. *Cancer* 2014;120:3245-3253.
- Dusetzina SB, Winn AN, Abel GA, et al. Cost sharing and adherence to tyrosine kinase inhibitors for patients with chronic myeloid leukemia. *J Clin Oncol* 2014;32:306-311.
- Ekwueme DU, Yabroff KR, Guy GP Jr, et al. Medical costs and productivity losses of cancer survivors—United States, 2008-2011. *MMWR Morb Mortal Wkly Rep* 2014;63:505-510.
- Fenn K, Evans SB, McCormick R, et al. Impact of financial burden of cancer on survivors' quality of life. *J Oncol Pract* 2014;10:332-338.
- Jagsi R, Pottow JAE, Griffith KA, et al. Long-term financial burden of breast cancer: experiences of a diverse cohort of survivors identified through population-based registries. *J Clin Oncol* 2014;32:1269-1276.
- Khera N, Chang YH, Hashmi S, et al. Financial burden in recipients of allogeneic hematopoietic cell transplantation. *Biol Blood Marrow Transplant* 2014;20:1375-1381.

**eTable 2. Study and Patient Characteristics and Measures of Financial Toxicity Burdens (cont.)**

45. Kircher SM, Johansen ME, Nimeiri HS, et al. Impact of Medicare Part D on out-of-pocket drug costs and medical use for patients with cancer. *Cancer* 2014;120:3378–3384.
46. Martin MY, Fouad MN, Oster RA, et al. What do cancer patients worry about when making decisions about treatment? Variation across racial/ethnic groups. *Support Care Cancer* 2014;22:233–244.
47. Regenbogen SE, Veenstra CM, Hawley ST, et al. The personal financial burden of complications after colorectal cancer surgery. *Cancer* 2014;120:3074–3081.
48. Veenstra CM, Regenbogen SE, Hawley ST, et al. A composite measure of personal financial burden among patients with stage III colorectal cancer. *Med Care* 2014;52:957–962.
49. Blinder V, Patil S, Eberle C, et al. Early predictors of not returning to work in low-income breast cancer survivors: a 5-year longitudinal study. *Breast Cancer Res Treat* 2013;140:407–416.
50. Davidoff AJ, Erten M, Shaffer T, et al. Out-of-pocket health care expenditure burden for Medicare beneficiaries with cancer. *Cancer* 2013;119:1257–1265.
51. Dowling EC, Chawla N, Forsythe LP, et al. Lost productivity and burden of illness in cancer survivors with and without other chronic conditions. *Cancer* 2013;119:3393–3401.
52. Goodwin JA, Coleman EA, Sullivan E, et al. Personal financial effects of multiple myeloma and its treatment. *Cancer Nurs* 2013;36:301–308.
53. Hamilton JG, Wu LM, Austin JE, et al. Economic survivorship stress is associated with poor health-related quality of life among distressed survivors of hematopoietic stem cell transplantation. *Psychooncology* 2013;22:911–921.
54. Kent EE, Forsythe LP, Yabroff KR, et al. Are survivors who report cancer-related financial problems more likely to forgo or delay medical care? *Cancer* 2013;119:3710–3717.
55. Ramsey S, Blough D, Kirchoff A, et al. Washington State cancer patients found to be at greater risk for bankruptcy than people without a cancer diagnosis. *Health Aff (Millwood)* 2013;32:1143–1152.
56. Wan Y, Gao X, Mehta S, et al. Indirect costs associated with metastatic breast cancer. *J Med Econ* 2013;16:1169–1178.
57. Zafar SY, Peppercorn JM, Schrag D, et al. The financial toxicity of cancer treatment: a pilot study assessing out-of-pocket expenses and the insured cancer patient's experience. *Oncologist* 2013;18:381–390.
58. Zullig LL, Peppercorn JM, Schrag D, et al. Financial distress, use of cost-coping strategies, and adherence to prescription medication among patients with cancer. *J Oncol Pract* 2013;9(Suppl 6):60s–63s.
59. Meneses K, Azuero A, Hassey L, et al. Does economic burden influence quality of life in breast cancer survivors? *Gynecol Oncol* 2012;124:437–443.
60. Shankaran V, Jolly S, Blough D, et al. Risk factors for financial hardship in patients receiving adjuvant chemotherapy for colon cancer: a population-based exploratory analysis. *J Clin Oncol* 2012;30:1608–1614.
61. Bernard DSM, Farr SL, Fang Z. National estimates of out-of-pocket health care expenditure burdens among nonelderly adults with cancer: 2001 to 2008. *J Clin Oncol* 2011;29:2821–2826.
62. Streeter SB, Schwartzberg L, Husain N, et al. Patient and plan characteristics affecting abandonment of oral oncolytic prescriptions. *Am J Manag Care* 2011;17(Suppl 5):SP38–44.
63. Neugut AI, Subar M, Wilde ET, et al. Association between prescription co-payment amount and compliance with adjuvant hormonal therapy in women with early-stage breast cancer. *J Clin Oncol* 2011;29:2534–2542.
64. de Moor JS, Partridge AH, Winer EP, et al. The role of socioeconomic status in adjustment after ductal carcinoma in situ. *Cancer* 2010;116:1218–1225.
65. Khera N, Chow EJ, Leisenring WM, et al. Factors associated with adherence to preventive care practices among hematopoietic cell transplantation survivors. *Biol Blood Marrow Transplant* 2011;17:995–1003.
66. Markman M, Luce R. Impact of the cost of cancer treatment: an internet-based survey. *J Oncol Pract* 2010;6:69–73.
67. Weaver KE, Rowland JH, Bellizzi KM, et al. Forgoing medical care because of cost: assessing disparities in healthcare access among cancer survivors living in the United States. *Cancer* 2010;116:3493–3504.
68. Pezzin LE, O'Neil MB, Nattinger AB. The economic consequences of breast cancer adjuvant hormonal treatments. *J Gen Intern Med* 2009;24(Suppl 2):S446–450.
69. Ell K, Xie B, Wells A, et al. Economic stress among low-income women with cancer: effects on quality of life. *Cancer* 2008;112:616–625.
70. Gupta D, Lis CG, Grutsch JF. Perceived cancer-related financial difficulty: implications for patient satisfaction with quality of life in advanced cancer. *Support Care Cancer* 2007;15:1051–1056.
71. Francoeur RB. Cumulative financial stress and strain in palliative radiation outpatients: the role of age and disability. *Acta Oncol* 2005;44:369–381.
72. Langa KM, Fendrick AM, Chernew ME, et al. Out-of-pocket health-care expenditures among older Americans with cancer. *Value Health* 2004;7:186–194.
73. Smith JC, Johnson JT, Cognetti DM, et al. Quality of life, functional outcome, and costs of early glottic cancer. *Laryngoscope* 2003;113:68–76.
74. Houts PS, Harvey HA, Simmonds MA, et al. Characteristics of patients at risk for financial burden because of cancer and its treatment. *J Psychosoc Oncol* 1985;3:15–22.

**eTable 3. Strength of Evidence Assessment Using GRADE Criteria**

| Analysis                                                              | Assessment     | Other Details                           |
|-----------------------------------------------------------------------|----------------|-----------------------------------------|
| Sample-weighted prevalence of financial burden                        |                |                                         |
| Limitations in study design                                           | Downgraded     | 8 studies judged "fair" in risk of bias |
| Inconsistency of result                                               | Downgraded     | Because of substantial heterogeneity    |
| Indirectness of evidence                                              | Downgraded     | Because of substantial heterogeneity    |
| Imprecision                                                           | Not downgraded |                                         |
| Publications of bias                                                  | Not downgraded | Not present                             |
| General assessment                                                    | Very low       |                                         |
| Association between insurance status and financial burdens            |                |                                         |
| Limitations in study design                                           | Not downgraded |                                         |
| Inconsistency of result                                               | Downgraded     | Because of substantial heterogeneity    |
| Indirectness of evidence                                              | Downgraded     | Because of substantial heterogeneity    |
| Imprecision                                                           | Not downgraded |                                         |
| Publications of bias                                                  | Not downgraded | Cannot be assessed                      |
| General assessment                                                    | Low            |                                         |
| Association between financial burdens and cancer medication adherence |                |                                         |
| Limitations in study design                                           | Not downgraded |                                         |
| Inconsistency of result                                               | Downgraded     | Because of substantial heterogeneity    |
| Indirectness of evidence                                              | Downgraded     | Differences in populations and outcomes |
| Imprecision                                                           | Downgraded     | Large confidence intervals              |
| Publications of bias                                                  | Not downgraded | Cannot be assessed                      |
| General assessment                                                    | Very low       |                                         |

Abbreviation: GRADE, Grading of Recommendations Assessment, Development, and Evaluation criteria.

**Table 4. Risk Factors of Financial Toxicity Burdens**

| Reference<br>• Burden Type                 | Model<br>• Outcome                                                                     | Socioeconomic                                                                                                                                                                                                                                                                                                                                                                                                                                                                                                                                                                     | Demographic                                                                                                                                                                                                                                                                                                                                                                                                                                                             | Clinical                                                                                                                                                                                                                                                                                                                                                                                                              |
|--------------------------------------------|----------------------------------------------------------------------------------------|-----------------------------------------------------------------------------------------------------------------------------------------------------------------------------------------------------------------------------------------------------------------------------------------------------------------------------------------------------------------------------------------------------------------------------------------------------------------------------------------------------------------------------------------------------------------------------------|-------------------------------------------------------------------------------------------------------------------------------------------------------------------------------------------------------------------------------------------------------------------------------------------------------------------------------------------------------------------------------------------------------------------------------------------------------------------------|-----------------------------------------------------------------------------------------------------------------------------------------------------------------------------------------------------------------------------------------------------------------------------------------------------------------------------------------------------------------------------------------------------------------------|
| Wheeler et al, 2018 <sup>1</sup><br>• P, I | Adjusted logistic regression<br>• Financial impact score                               | <ul style="list-style-type: none"> <li>Income: adjusted risk differences for adverse financial impact; compared with income &gt;\$50,000/y, patients with income \$15,000–\$29,999/y had ↑ financial impact score (worse impact) (ASD, 13.93 [SE, 3.33]) and those with income \$30,000–\$49,999 had ↑ financial impact score (ASD, 9.279 [SE, 2.86]; P&lt;.05)</li> <li>Insurance: compared with privately insured patients, those with no insurance and Medicaid had ↑ financial impact score (worse impact) (ASD, 28.45 [SE, 4.74] and 21.11 [SE, 3.75]; P&lt;.001)</li> </ul> | <ul style="list-style-type: none"> <li>Age: older age had ↓ financial impact score (less impact) (ASD, -0.70 [SE, 0.10] per y); P&lt;.001</li> <li>Race/Ethnicity: black patients had ↑ financial impact score (worse impact) (ASD, 5.42 [SE, 2.16]) compared with white patients; P&lt;.05</li> <li>Marital status: separated/divorced patients had ↑ financial impact score (worse impact) (ASD, 6.35 [SE, 2.67]) compared with married patients; P&lt;.05</li> </ul> | <ul style="list-style-type: none"> <li>Chemotherapy: ↑ financial impact score (worse impact) (ASD, 9.59 [SE, 2.53]) compared with no chemotherapy; P&lt;.05</li> <li>Cancer stage: stage IV had ↑ financial impact score (worse impact) (ASD, 14.09 [SE, 6.22]) compared with stage I; P&lt;.05</li> </ul>                                                                                                            |
| de Souza et al, 2017 <sup>2</sup><br>• P   | Adjusted logistic regression<br>• COST score (↑ COST score = lower financial toxicity) | <ul style="list-style-type: none"> <li>Household income: high-income patients had ↑ COST score; patients with &gt;800% of FPL had 12-point ↑ mean COST score vs those with ≤200% of FPL (P=.003)</li> <li>Employment: unemployed patients had ↓ COST score (β=11.68; 95% CI, 4.43–18.44; P&lt;.001)</li> </ul>                                                                                                                                                                                                                                                                    | <ul style="list-style-type: none"> <li>Race/Ethnicity: white patients had ↑ COST scores vs Hispanic (β= -2.41; 95% CI, -8.66–3.83), black (β= -5.41; 95% CI, -9.60 to -0.67), and Asian and Native American patients (β= -9.85; 95% CI, -19.82 to 0.12; P=.04)</li> </ul>                                                                                                                                                                                               | <ul style="list-style-type: none"> <li>Number of in-patient admissions: patients with ≥3 vs ≤2 hospital admissions had ↓ COST scores (β= -5.52; 95% CI, -9.87 to -1.16; P=.01)</li> <li>Psychological distress: Patients with high distress had ↓ COST scores (β= -0.34; 95% CI, -0.56 to -0.12; P=.003)</li> </ul>                                                                                                   |
| Meeker et al, 2017 <sup>3</sup><br>• P     | Adjusted linear regression<br>• Financial distress score                               | <ul style="list-style-type: none"> <li>Income: income ≥\$75,000/y had ↑ financial score (less distress) vs income &lt;\$25,000/y (β=1.88; 95% CI, 0.27–3.49; P=.02)</li> </ul>                                                                                                                                                                                                                                                                                                                                                                                                    | <ul style="list-style-type: none"> <li>Age: increasing age ≥65 y had ↑ financial score (less distress) compared with age &lt;50 y (β=1.52; 95% CI, 0.03–3.01; P=.05)</li> </ul>                                                                                                                                                                                                                                                                                         | <ul style="list-style-type: none"> <li>Time since treatment: patients within 12 mo of treatment (mean ratio, 1.55; 95% CI, 1.10–2.19; P=.04) had ↑ OOP cost compared with those within ≥24 mo of treatment</li> <li>Use of supportive services: patients using support services had ↑ OOP costs (mean ratio, 1.35; 95% CI, 1.03–1.76; P=.03) and ↑ OOP burden (mean ratio, 1.46; 95% CI, 1.05–2.03; P=.03)</li> </ul> |
| Pisu et al, 2017 <sup>4</sup><br>• D       | Repeated-measures model with generalized linear mixed method<br>• ↑ OOP cost           | <ul style="list-style-type: none"> <li>Employment: part-time, unemployed, retired, or on disability had ↑ OOP burden vs full-time employed, P=.036</li> <li>Income decrease since end of treatment: patients with income decrease since treatment had ↑ OOP costs (mean ratio, 1.42; 95% CI, 1.11–1.81; P=.005) and ↑ OOP cost burden (mean ratio, 1.66; 95% CI, 1.21–2.29; P=.002)</li> </ul>                                                                                                                                                                                    | <ul style="list-style-type: none"> <li>Age: age ≥65 y had ↓ OOP cost burden (mean ratio, 0.68; 95% CI, 0.50–0.92; P=.01)</li> </ul>                                                                                                                                                                                                                                                                                                                                     | <ul style="list-style-type: none"> <li>Treatment type: patients with transplant-related costs more likely to experience any hardship (OR, 6.86; 95% CI, 3.82–12.3; P&lt;.001) and all 3 hardships (OR, 3.84; 95% CI, 1.57–9.36; P=.003)</li> </ul>                                                                                                                                                                    |
| Abel et al, 2016 <sup>5</sup><br>• P, I    | Adjusted logistic regression<br>• Financial hardship                                   | <ul style="list-style-type: none"> <li>Monthly income: low-income (OR, 10.43; 95% CI, 4.28–25.4; P&lt;.001) and middle-income patients (OR, 2.92; 95% CI, 1.47–5.78; P=.002) experienced any of the 3 hardships; low-income patients (OR, 5.45; 95% CI, 1.43–20.7; P=.01) more likely to experience all 3 hardships than middle- or high-income patients.</li> </ul>                                                                                                                                                                                                              | <ul style="list-style-type: none"> <li>Marital status: married patients less likely to experience all hardships (OR, 0.39; 95% CI, 0.18–0.88; P=.02)</li> </ul>                                                                                                                                                                                                                                                                                                         |                                                                                                                                                                                                                                                                                                                                                                                                                       |

(continued on next page)

Abbreviations: ASD, adjusted score difference; CCC, comprehensive cancer center; COST, Comprehensive Score for financial Toxicity; CRC, colorectal cancer; CRN, cost-related nonadherence; D, direct material burdens; EE, effect estimate; FPL, federal poverty level; GPH, general public hospital; HMO, health maintenance organization; I, indirect burdens; MCS, Mental Component Score; OOP, out of pocket; OR, odds ratio; P, psychological burdens; PCS, Physical Component Score; QoL, quality of life.

**eTable 4. Risk Factors of Financial Toxicity Burdens (cont.)**

| Reference<br>• Burden Type                  | Model<br>• Outcome                                                 | Socioeconomic                                                                                                                                                                                                                                                                                                                                                                                                                                                                                                                                                                                                                                                                                                                                                                                   | Demographic                                                                                                                                                                                                                                                                                                                                                                                                                                                                                                                                                                               | Clinical                                                                                                                                                                                                                                                                                                                                                                                                                  |
|---------------------------------------------|--------------------------------------------------------------------|-------------------------------------------------------------------------------------------------------------------------------------------------------------------------------------------------------------------------------------------------------------------------------------------------------------------------------------------------------------------------------------------------------------------------------------------------------------------------------------------------------------------------------------------------------------------------------------------------------------------------------------------------------------------------------------------------------------------------------------------------------------------------------------------------|-------------------------------------------------------------------------------------------------------------------------------------------------------------------------------------------------------------------------------------------------------------------------------------------------------------------------------------------------------------------------------------------------------------------------------------------------------------------------------------------------------------------------------------------------------------------------------------------|---------------------------------------------------------------------------------------------------------------------------------------------------------------------------------------------------------------------------------------------------------------------------------------------------------------------------------------------------------------------------------------------------------------------------|
| Banegas et al, 2016 <sup>6</sup><br>• I     | Adjusted logistic regression<br>• Borrow, go into debt, bankruptcy | <ul style="list-style-type: none"> <li>Income: lower-income patients more likely to borrow/go into debt (\$40,000–\$80,000/y: OR, 2.46; P&lt;.001; &lt;\$40,000/y: OR, 3.52; P&lt;.001) and file for bankruptcy (\$40,000–\$80,000/y: OR, 2.80; P&lt;.001; &lt;\$40,000/y: OR, 4.50; P&lt;.001) compared with &gt;\$80,000/y</li> <li>Employment status: unemployed (OR, 1.28; P&lt;.05) more likely and retired (OR, 0.51; P&lt;.001) less likely to borrow/go into debt; unemployed patients (OR, 1.74; P&lt;.05) more likely to file for bankruptcy</li> <li>Insurance: publicly insured (OR, 1.95; P&lt;.001) and uninsured patients (OR, 2.46; P&lt;.001) more likely to borrow/go into debt; publicly insured patients (OR, 1.82; P&lt;.05) more likely to file for bankruptcy</li> </ul> | <ul style="list-style-type: none"> <li>Age: younger patients more likely to borrow money/go into debt (aged 45–54 y: OR, 1.66; aged 18–44 y: OR, 2.07; P&lt;.001) and file for bankruptcy (aged 45–54 y: OR, 1.86; aged 18–44 y: OR, 1.81; P&lt;.05) compared with those aged 55–64 y</li> <li>Sex and marital status: unmarried males (OR, 1.37; P&lt;.05) and unmarried females (OR, 1.56; P&lt;.001) more likely to borrow money/go into debt</li> <li>Race/Ethnicity: Hispanic patients (OR, 1.41; P&lt;.05) more likely to borrow/go into debt than non-Hispanic patients</li> </ul> | <ul style="list-style-type: none"> <li>Number of cancer diagnoses: patients with ≥2 more likely to borrow/go into debt (OR, 1.49; P&lt;.001) and file for bankruptcy (OR, 2.00; P&lt;.001)</li> <li>Time since last treatment: ≥6 y (OR, 0.82; P&lt;.05) and 3–5 y (OR, 1.71; P&lt;.05) less likely to borrow/go into debt compared with &lt;1 y; ≥6 y (OR, 1.65; P&lt;.05) more likely to file for bankruptcy</li> </ul> |
| Chongpison et al, 2016 <sup>7</sup><br>• P  | Mean and SD<br>• Financial burden                                  | <ul style="list-style-type: none"> <li>Education: patients with lower education (high school or less) (mean, 2.41±3.06) had ↑ financial burden score</li> <li>Household income: patients with lower income (≤\$30,000/y) (mean, 3.11±3.34) had ↑ burden</li> <li>Employment: full-time or part-time (mean, 2.09±2.83), unemployed (mean, 5.27±3.77), and patients on disability (mean, 5.33±3.06) had ↑ burden compared with retired and nonworking patients (mean, 1.69±2.55)</li> </ul>                                                                                                                                                                                                                                                                                                       |                                                                                                                                                                                                                                                                                                                                                                                                                                                                                                                                                                                           | <ul style="list-style-type: none"> <li>Type of surgery: patients with permanent (mean, 2.56±3.01) and temporary ostomy (mean, 2.28±2.74) had ↑ burden score than those with anastomosis (mean, 1.63±2.62)</li> <li>Recall of depression after surgery: patients with depression (mean, 3.22±3.34) had ↑ burden than those with no depression (mean, 1.35±2.18)</li> </ul>                                                 |
| Kale & Carroll, 2016 <sup>8</sup><br>• P, I | Adjusted logistic regression<br>• Financial burden                 | <ul style="list-style-type: none"> <li>Insurance: patients with no insurance during treatment (OR, 1.99; CI, 1.33–2.98) had ↑ burden compared with insured patients</li> </ul>                                                                                                                                                                                                                                                                                                                                                                                                                                                                                                                                                                                                                  | <ul style="list-style-type: none"> <li>Age: younger patients (OR, 1.87; 95% CI, 1.23–2.83) had ↑ burden</li> <li>Sex: female patients (OR, 1.43; 95% CI, 1.00–2.04) had ↑ burden</li> <li>Race/Ethnicity: Hispanic (OR, 1.68; 95% CI, 1.02–2.76) and black patients (OR, 1.09; 95% CI, 0.51–2.18) had ↑ burden than non-Hispanic white patients</li> </ul>                                                                                                                                                                                                                                | <ul style="list-style-type: none"> <li>Cancer type: patients with short-survival type cancer (OR, 3.28; 95% CI, 1.43–7.51) had ↑ burden than patients with breast cancer</li> <li>Time since last treatment: &gt; 1 y (OR, 2.55; 95% CI, 1.68–3.86) had ↑ burden than ≥5 y</li> <li>Time since diagnosis: 1–&lt;3 previous y (OR, 1.69; 95% CI, 1.14–2.50) had ↑ burden than ≥5 y</li> </ul>                              |

(continued on next page)

Abbreviations: ASD, adjusted score difference; CCC, comprehensive cancer center; COST, Comprehensive Score for financial Toxicity; CRC, colorectal cancer; CRN, cost-related nonadherence; D, direct material burdens; EE, effect estimate; FPL, federal poverty level; GPH, general public hospital; HMO, health maintenance organization; I, indirect burdens; MCS, Mental Component Score; OFFS, objective family financial stress; OOP, out of pocket; OR, odds ratio; P, psychological burdens; PCS, Physical Component Score; QoL, quality of life.

**eTable 4. Risk Factors of Financial Toxicity Burdens (cont.)**

| Reference<br>• Burden Type                   | Model<br>• Outcome                                                            | Socioeconomic                                                                                                                                                                                                                                                                                                                                                                                | Demographic                                                                                                                                                                                                                                                                                                                                                                                                                                                                                                                                                                                                                                                                                                                               | Clinical                                                                                                                                                                                                                                                                                                                                                                                                                                                                                                                                      |
|----------------------------------------------|-------------------------------------------------------------------------------|----------------------------------------------------------------------------------------------------------------------------------------------------------------------------------------------------------------------------------------------------------------------------------------------------------------------------------------------------------------------------------------------|-------------------------------------------------------------------------------------------------------------------------------------------------------------------------------------------------------------------------------------------------------------------------------------------------------------------------------------------------------------------------------------------------------------------------------------------------------------------------------------------------------------------------------------------------------------------------------------------------------------------------------------------------------------------------------------------------------------------------------------------|-----------------------------------------------------------------------------------------------------------------------------------------------------------------------------------------------------------------------------------------------------------------------------------------------------------------------------------------------------------------------------------------------------------------------------------------------------------------------------------------------------------------------------------------------|
| Lathan et al, 2016 <sup>9</sup><br>• I       | Unadjusted<br>• Financial reserves                                            | <ul style="list-style-type: none"> <li>Insurance: patients reporting &lt;2 mo financial reserves more likely to be insured by Medicaid or have no insurance than patients reporting &gt;2 mo financial reserves</li> <li>Supplemental insurance: patients without had ↑ mean OOP expenses and financial burden, with a spending mean of 23.7% of household income on OOP expenses</li> </ul> | <ul style="list-style-type: none"> <li>Age: younger patients (mean, aged 52.6 vs 63.9 y) had ↑ odds of bankruptcy vs no bankruptcy</li> <li>Sex: females (55%) had ↑ odds bankruptcy</li> <li>Race: nonwhite patients (14% vs 11%) had ↑ odds bankruptcy</li> </ul>                                                                                                                                                                                                                                                                                                                                                                                                                                                                       |                                                                                                                                                                                                                                                                                                                                                                                                                                                                                                                                               |
| Narang & Nicholas, 2017 <sup>10</sup><br>• D | Adjusted logistic regression<br>• OOP expenses                                |                                                                                                                                                                                                                                                                                                                                                                                              |                                                                                                                                                                                                                                                                                                                                                                                                                                                                                                                                                                                                                                                                                                                                           |                                                                                                                                                                                                                                                                                                                                                                                                                                                                                                                                               |
| Ramsey et al, 2016 <sup>11</sup><br>• I      | Adjusted logistic regression<br>• Bankruptcy in original cohort               |                                                                                                                                                                                                                                                                                                                                                                                              | <ul style="list-style-type: none"> <li>Income: patients in active treatment with income &lt;200% of FPL (OR, 15.7; 95% CI, 2.6–95.2) or 200 to &lt;400% of FPL (OR, 8.2; 95% CI, 1.3–52.4) had ↑ financial difficulty compared with income &gt;400% FPL</li> <li>Residence: patients in nonmetropolitan area (OR, 6.4; 95% CI, 1.6–25.0) had ↑ financial difficulty compared with those in metropolitan area</li> <li>Education: patients aged &lt;65 y with 12–16 y education (OR, 1.9; 95% CI, 1.1–3.6) had ↑ financial difficulty compared with ≥16 y education</li> <li>Insurance: patients aged &lt;65 y and uninsured (OR, 3.5; 95% CI, 1.3–9.3) or publicly insured (OR, 9.0; 95% CI, 3.3–24.4) had ↑ work modification</li> </ul> | <ul style="list-style-type: none"> <li>Health status: patients in active treatment with good/fair/poor health status had ↑ financial difficulty (OR, 3.8; 95% CI, 1.0–14.2) and ↑ work modification (OR, 10.4; 95% CI, 2.0–54.8) compared with patients with excellent/very good health status; among patients age &lt;65 y, those with good/fair/poor health status had ↑ financial difficulty (OR, 2.4; 95% CI, 1.4–4.1) and ↑ work modification (OR, 4.1; 95% CI, 1.6–10.2) compared with those with excellent/very good health</li> </ul> |
| Whitney et al, 2016 <sup>12</sup><br>• P, I  | Adjusted logistic regression<br>• Financial difficulty<br>• Work modification |                                                                                                                                                                                                                                                                                                                                                                                              | <ul style="list-style-type: none"> <li>Race/Ethnicity: nonwhite patients (OR, 8.0; 95% CI, 2.2–28.4) had ↑ financial difficulty compared with white patients</li> <li>Marital status: patients aged &lt;65 y and married (OR, 2.2; 95% CI, 1.0–4.7) had ↑ work modification compared with unmarried patients</li> </ul>                                                                                                                                                                                                                                                                                                                                                                                                                   |                                                                                                                                                                                                                                                                                                                                                                                                                                                                                                                                               |
| Wong et al, 2016 <sup>13</sup><br>• P        | One-way ANOVA or Kruskal-Wallis test<br>• Cost concern                        |                                                                                                                                                                                                                                                                                                                                                                                              | <ul style="list-style-type: none"> <li>Age: patients aged ≤65 y (mean, 8.86±2.67; P&lt;.001) had ↑ mean of total cost concerns</li> <li>Sex: females (mean, 8.77±2.68; P=.04) had ↑ mean of total cost concerns</li> <li>Marital status: unmarried patients (mean, 8.97±2.62; P=.01) had ↑ mean of total cost concerns</li> </ul>                                                                                                                                                                                                                                                                                                                                                                                                         |                                                                                                                                                                                                                                                                                                                                                                                                                                                                                                                                               |

(continued on next page)

Abbreviations: ASD, adjusted score difference; CCC, comprehensive cancer center; COST, Comprehensive Score for financial Toxicity; CRC, colorectal cancer; CRN, cost-related nonadherence; D, direct maternal burdens; EE, effect estimate; FPL, federal poverty level; GPH, general public hospital; HMO, health maintenance organization; I, indirect burdens; MCS, Mental Component Score; OFFS, objective family financial stress; OOP, out of pocket; OR, odds ratio; P, psychological burdens; PCS, Physical Component Score; QoL, quality of life.

**Table 4. Risk Factors of Financial Toxicity Burdens (cont.)**

| Reference<br>• Burden Type                            | Model<br>• Outcome                                                                                      | Socioeconomic                                                                                                                                                                                                                                                                                                | Demographic                                                                                                                                                                                                                                                                                                                  | Clinical                                                                                                                                                                                                                                                     |
|-------------------------------------------------------|---------------------------------------------------------------------------------------------------------|--------------------------------------------------------------------------------------------------------------------------------------------------------------------------------------------------------------------------------------------------------------------------------------------------------------|------------------------------------------------------------------------------------------------------------------------------------------------------------------------------------------------------------------------------------------------------------------------------------------------------------------------------|--------------------------------------------------------------------------------------------------------------------------------------------------------------------------------------------------------------------------------------------------------------|
| Yabroff et al, 2016 <sup>14</sup><br>• P, I           | Adjusted logistic regression<br>• 1. Material financial hardship<br>• 2. Psychologic financial hardship | Patients aged 18–64:<br>• Employment: employed but took extended leave or switched to part time had ↑ material hardship (P<.001)<br>• Income and time since treatment: lower family income meant ↑ psychological hardship (P=.019)<br>• Insurance: uninsured had ↑ psychological hardship (P=.043)           | • Age: younger patients (aged 18–54 y vs aged 55–64 y vs aged 65–74 y vs aged ≥75 y) had ↑ material hardship (P=.009)<br>• Age: in ≥65 y age group, those aged 65–74 had ↑ psychological hardship (P=.012)<br>• Race/Ethnicity: nonwhite had ↑ material hardship (P=.008)<br>• Sex: females had ↑ material hardship (P=.034) | • Time since treatment: shorter time interval since treatment had ↑ material hardship (P=.014) and psychological (P=.024)                                                                                                                                    |
| Zheng et al, 2015 <sup>15</sup><br>• I, D             | Frequencies<br>• Employment disability and productivity loss                                            |                                                                                                                                                                                                                                                                                                              | • Age: nonelderly CRC and breast cancer survivors had ↑ employment disability (13.6%, P<0.001; 4.8%, P=.001) and productivity loss at work (7.2 d, P<.001; 3.3 d, P=.002) and at home (4.5 d, P<.001; 3.3 d, P=.003)                                                                                                         |                                                                                                                                                                                                                                                              |
| Callahan & Brintzenhofesoz, 2015 <sup>16</sup><br>• P | Adjusted regression<br>• Financial QoL                                                                  | • Health insurance adequacy: patients with health insurance adequacy had ↑ financial QoL (β=.259; P=.002)<br>• Financial stress: patients with lower financial stress had ↑ financial QoL (β=.370; P<.001)<br>• Barriers to care: patients with lower barriers to care had ↑ financial QoL (β=-.329; P=.003) |                                                                                                                                                                                                                                                                                                                              |                                                                                                                                                                                                                                                              |
| Delgado-Guay et al, 2015 <sup>17</sup><br>• P, I      | Frequencies<br>• Financial distress                                                                     |                                                                                                                                                                                                                                                                                                              |                                                                                                                                                                                                                                                                                                                              | • Cancer care facility: financial distress ↑ in GPH vs CCC<br>• Financial distress present in 86% (95% CI, 76%–93%) served at CCC vs 90% (95% CI, 81%–96%) served at GPH (P=.45)<br>• Median intensity score of financial distress, CCC=4 vs GPH=8, P=.0003. |
| Guy et al, 2015 <sup>18</sup><br>• D                  | Adjusted logistic regression<br>• OOP burden                                                            | • Income: patients who were ear-poor/low-income (100%–200% FPL) had ↑ OOP burden compared with noncancer individuals; P=.002<br>• Employment: full-time employed had ↑ OOP burden compared with noncancer individuals; P<.05                                                                                 | • Age: patients aged 50–64 y had ↑ OOP burden compared with noncancer individuals; P=.02                                                                                                                                                                                                                                     |                                                                                                                                                                                                                                                              |
| Huntington et al, 2015 <sup>19</sup><br>• P           | Adjusted regression analyses<br>• Financial burden (COST score)                                         | • Income: patients with lower income, \$40,000–\$79,999/y (β=7.8; 95% CI, 2.7–12.9; P=.0031) vs ≥\$80,000 (β=11.8; 95% CI, 7.1–16.4; P<.0001) had ↑ financial burden                                                                                                                                         | • Marital status: nonmarried patients (β=5.6; 95% CI, 1.5–9.6; P=.007) had ↑ financial burden<br>• Age: younger patients (β=0.36; 95% CI, 0.15–0.56; P<.001) had ↑ financial burden                                                                                                                                          | • Time since diagnosis: patients with longer duration since diagnosis (β=-4.8; 95% CI, -9.3 to -0.2; P=.042) had ↑ financial burden                                                                                                                          |

(continued on next page)

Abbreviations: ASD, adjusted score difference; CCC, comprehensive cancer center; COST, Comprehensive Score for financial Toxicity; CRC, colorectal cancer; CRN, cost-related nonadherence; D, direct material burdens; EE, effect estimate; FPL, federal poverty level; GPH, general public hospital; HMO, health maintenance organization; I, indirect burdens; MCS, Mental Component Score; OFFS, objective family financial stress; OOP, out of pocket; OR, odds ratio; P, psychological burdens; PCS, Physical Component Score; QoL, quality of life.



**Table 4. Risk Factors of Financial Toxicity Burdens (cont.)**

| Reference<br>• Burden Type                     | Model<br>• Outcome                                    | Socioeconomic                                                                                                                                                                                                                                                                                 | Demographic                                                                                                                                                                                                                                                                                                                                                                                                                                                                                                                                                          | Clinical                                                                                                                                                                                                                                                                                       |
|------------------------------------------------|-------------------------------------------------------|-----------------------------------------------------------------------------------------------------------------------------------------------------------------------------------------------------------------------------------------------------------------------------------------------|----------------------------------------------------------------------------------------------------------------------------------------------------------------------------------------------------------------------------------------------------------------------------------------------------------------------------------------------------------------------------------------------------------------------------------------------------------------------------------------------------------------------------------------------------------------------|------------------------------------------------------------------------------------------------------------------------------------------------------------------------------------------------------------------------------------------------------------------------------------------------|
| Jones et al, 2015 <sup>20</sup><br>• P         | ANOVA<br>• Perceived financial burden                 | <ul style="list-style-type: none"> <li>Income: increased income had ↓ financial burden: &lt;\$25,000/y (mean, 5.9±3.9), \$25,000–\$50,000/y (mean, 5.2±3.7), \$51,000–\$75,000/y (mean, 4.1±3.5), \$76,000–\$100,000/y (mean, 3.4±3.2), &gt;\$100,000/y (mean, 2.8±3.0); P&lt;.001</li> </ul> | <ul style="list-style-type: none"> <li>Age: increased age had ↓ financial burden, P&lt;.001; age 18–39 y (mean, 6.1±3.5), age 40–64 y (mean, 4.7±3.6), age &gt;65 y (mean, 2.5±3.1)</li> <li>Marital status: married patients had ↓ financial burden (mean, 3.9; SD, 3.6) vs unmarried patients (mean, 4.8±3.8); P=.024</li> <li>Race: black patients had ↑ OOP vs white patients (52% vs 28%; P=.01)</li> </ul>                                                                                                                                                     | <ul style="list-style-type: none"> <li>Time since treatment: patients with longer time since treatment had ↓ financial burden (P=.038); patients still receiving “maintenance” treatment (mean, 4.7±3.0) vs 3–24 mo (mean, 4.6±3.8) and 25–48 mo (mean, 3.8±3.5) from any treatment</li> </ul> |
| Palmer et al, 2015 <sup>21</sup><br>• P, I     | Chi-square test<br>• OOP costs                        |                                                                                                                                                                                                                                                                                               |                                                                                                                                                                                                                                                                                                                                                                                                                                                                                                                                                                      |                                                                                                                                                                                                                                                                                                |
| Pisu et al, 2015 <sup>22</sup><br>• P          | Adjusted logistic regression<br>• Economic hardship   | <ul style="list-style-type: none"> <li>No drug coverage: ↑ risk of economic hardship among patients with lung cancer (OR, 1.47; 95% CI, 1.01–2.14) and CRC (OR, 1.48; 95% CI, 1.02–2.13)</li> <li>Income: ≥\$20,000/y had ↓ risk of economic hardship</li> </ul>                              | <ul style="list-style-type: none"> <li>Race/Ethnicity: among patients with CRC, black patients had ↑ risk of economic hardship vs white patients (OR, 1.69; 95% CI, 1.25–2.29).</li> <li>Number of individuals supported: patients with ≥3 dependents had ↑ risk of economic hardship among patients with lung cancer (OR, 1.80; 95% CI, 1.13–2.85) and with CRC (OR, 1.59; 95% CI, 1.11–2.26)</li> <li>Age: among patients with lung cancer, those aged ≥65 y had ↓ risk of economic hardship; those with CRC aged ≥55 y had ↓ risk of economic hardship</li> </ul> | <ul style="list-style-type: none"> <li>Intensity of end-of-life care received: patients with ↑ financial hardship received more intensive end-of-life care (OR, 3.05; 95% CI, 1.22–7.62)</li> </ul>                                                                                            |
| Tucker-Seeley et al, 2015 <sup>23</sup><br>• I | Adjusted logistic regression<br>• Financial hardship  |                                                                                                                                                                                                                                                                                               |                                                                                                                                                                                                                                                                                                                                                                                                                                                                                                                                                                      |                                                                                                                                                                                                                                                                                                |
| Zafar et al, 2015 <sup>24</sup><br>• P         | Adjusted path models<br>• Financial difficulty        | <ul style="list-style-type: none"> <li>Income: patients with lower income (&lt;\$20,000/y) (OR, 0.61; P&lt;.001) had ↑ financial difficulty</li> </ul>                                                                                                                                        | <ul style="list-style-type: none"> <li>Age: younger (OR, 0.65 per 10 y older, P&lt;.001) had ↑ financial difficulty</li> </ul>                                                                                                                                                                                                                                                                                                                                                                                                                                       |                                                                                                                                                                                                                                                                                                |
| Fenn et al, 2014 <sup>25</sup><br>• P          | Bivariate analyses<br>• Financial problems            | <ul style="list-style-type: none"> <li>↓ Education: had ↑ financial problems (P=.002)</li> <li>↓ Income: had ↑ financial problems (P&lt;.001)</li> <li>Insurance: Medicare had ↓ financial problems (P&lt;.001)</li> </ul>                                                                    | <ul style="list-style-type: none"> <li>Age: had ↑ financial problems (P&lt;.001)</li> <li>Sex: females had ↑ financial problems (P=.016)</li> <li>Race: nonwhite patients had ↑ financial problems (P=.001)</li> </ul>                                                                                                                                                                                                                                                                                                                                               | <ul style="list-style-type: none"> <li>Type of cancer: patients with thyroid (30.6%), ovarian (25.3%), and lung cancer (23.7%) had ↑ financial problems (P&lt;.001)</li> </ul>                                                                                                                 |
| Jagsi et al, 2014 <sup>26</sup><br>• I         | Adjusted logistic regression<br>• Excess unemployment | <ul style="list-style-type: none"> <li>Employment support: patients with no support (OR, 1.33; 95% CI, 1.08–1.67; P=.011) had excess unemployment</li> </ul>                                                                                                                                  | <ul style="list-style-type: none"> <li>Age: older patients (&gt;56 vs &lt;46 y; OR, 1.42; 95% CI, 1.03–1.95; P=.031) had excess unemployment</li> <li>Race: nonwhite patients had ↑ financial problems (P=.001)</li> </ul>                                                                                                                                                                                                                                                                                                                                           | <ul style="list-style-type: none"> <li>Comorbidity: patients with ≥2 comorbidities (OR, 2.16; 95% CI, 1.59–2.94; P&lt;.001) had excess unemployment</li> <li>Chemotherapy: patients who received chemotherapy (OR, 1.42; 95% CI, 1.03–1.98; P=.038) had excess unemployment</li> </ul>         |

(continued on next page)  
Abbreviations: ASD, adjusted score difference; CCC, comprehensive cancer center; COST, Comprehensive Score for financial Toxicity; CRC, colorectal cancer; CRN, cost-related nonadherence; D, direct material burdens; EE, effect estimate; FPL, federal poverty level; HMO, health maintenance organization; I, indirect burdens; MCS, Mental Component Score; OFFS, objective family financial stress; OOP, out of pocket; OR, odds ratio; P, psychological burdens; PCS, Physical Component Score; QoL, quality of life.

**Table 4. Risk Factors of Financial Toxicity Burdens (cont.)**

| Reference<br>• Burden Type                   | Model<br>• Outcome                                                         | Socioeconomic                                                                                                                                                                                                                                                                                                                                                                                                                                                                                                         | Demographic                                                                                                                                                                                                                                                                                                                                                                                           | Clinical                                                                                                                                                                                                                                                   |
|----------------------------------------------|----------------------------------------------------------------------------|-----------------------------------------------------------------------------------------------------------------------------------------------------------------------------------------------------------------------------------------------------------------------------------------------------------------------------------------------------------------------------------------------------------------------------------------------------------------------------------------------------------------------|-------------------------------------------------------------------------------------------------------------------------------------------------------------------------------------------------------------------------------------------------------------------------------------------------------------------------------------------------------------------------------------------------------|------------------------------------------------------------------------------------------------------------------------------------------------------------------------------------------------------------------------------------------------------------|
| Jagsi et al, 2014 <sup>27</sup><br>• P, I, D | Adjusted logistic regression<br>• Financial decline                        | <ul style="list-style-type: none"> <li>Income: patients with &lt;\$50,000 vs &gt;\$50,000 had ↑ financial decline (OR, 1.77; P=.034)</li> <li>Employment: patients working part-time had ↑ financial decline vs those not working (OR, 1.88; P=.019)</li> <li>Patients with reductions in work hours vs no reductions had ↑ financial decline (OR, 1.68; P=.04)</li> <li>Prescription insurance: partial (OR, 3.67; P=.001) and no coverage (OR, 2.70; P=.01) vs complete coverage had ↑ financial decline</li> </ul> | <ul style="list-style-type: none"> <li>Age: younger patients (all categories &lt;65 vs &gt;65 y; P&lt;.001) had ↑ financial decline</li> <li>Race: Spanish-speaking Latina vs white patients (OR, 2.76; P=.006) had ↑ financial decline</li> </ul>                                                                                                                                                    | <ul style="list-style-type: none"> <li>Chemotherapy: patients who received chemotherapy (OR, 2.14; P=.002) had ↑ financial decline</li> <li>Recurrent breast cancer: patients with recurrent disease (OR, 2.44; P=.017) had ↑ financial decline</li> </ul> |
| Khera et al, 2014 <sup>28</sup><br>• P, I    | Adjusted logistic regression<br>• Objective financial burden               | <ul style="list-style-type: none"> <li>Employment: compared with retired, employed patients had ↓ (OR, 0.32; 95% CI, 0.18–0.50; P=.0004)</li> </ul>                                                                                                                                                                                                                                                                                                                                                                   | <ul style="list-style-type: none"> <li>Age (per 5-y increase): younger patients (OR, 0.80; 95% CI, 0.7–0.97; P=.0009) had ↑ financial burden</li> </ul>                                                                                                                                                                                                                                               | <ul style="list-style-type: none"> <li>Current physical and mental functioning: patients with lower score (&lt;40) on PCS-12 (OR, 3.02; 95% CI, 1.6–5.9; P=.001) and MCS-12 (OR, 3.50; 95% CI, 1.4–8.5; P=.006) had ↑ financial burden</li> </ul>          |
| Martin et al, 2014 <sup>29</sup><br>• P      | Adjusted logistic regression<br>• Worry about treatment costs              | <ul style="list-style-type: none"> <li>Patients with higher income (≥\$20,000/y), higher education (≥high school), insurance (treatment being covered), and savings (≥1 y) had significant ↓ worry; all P&lt;.05</li> </ul>                                                                                                                                                                                                                                                                                           | <ul style="list-style-type: none"> <li>Race: Asian vs white: those with ≥2 dependents vs 1 dependent to support had ↑ worry, P&lt;.05</li> <li>Age: older patients (all categories aged ≥60 y vs aged &lt;54 y) had ↑ worry, P&lt;.05</li> </ul>                                                                                                                                                      |                                                                                                                                                                                                                                                            |
| Regenbogen et al, 2014 <sup>30</sup><br>• I  | Poisson regression<br>• Personal financial burden (positive EE = ↑ burden) | <ul style="list-style-type: none"> <li>Income: patients with lower income had ↑ financial burden. &lt;\$20,000/y (EE, 0.41; 95% CI, 0.19–0.63; P&lt;.001); \$20,000–\$49,000/y (EE, 0.65; 95% CI, 0.46–0.83; P&lt;.001); \$50,000–\$89,000/y (EE, 0.32; 95% CI, 0.15–0.50; P&lt;.001) vs ≥\$90,000/y</li> </ul>                                                                                                                                                                                                       | <ul style="list-style-type: none"> <li>Age: younger patients had ↑ financial burden compared with those aged &lt;50 y, 50–64 y (EE, –0.22; 95% CI, –0.36 to 0.10; P&lt;.001); 65–74 y (EE, –0.68; 95% CI, –0.83 to –0.52; P&lt;.001); ≥75 y (EE, 1.00; 95% CI, –1.19 to –0.80; P&lt;.001)</li> </ul>                                                                                                  | <ul style="list-style-type: none"> <li>Postoperative complications: yes (EE, 0.31; 95% CI, 0.20–0.42; P&lt;.001) had ↑ financial burden</li> <li>Chemotherapy: yes (EE, 0.54; 95% CI, 0.32–0.75; P&lt;.01) had ↑ financial burden</li> </ul>               |
| Veenstra et al, 2014 <sup>31</sup><br>• P    | t test or ANOVA<br>• Personal financial burden                             | <ul style="list-style-type: none"> <li>Income: patients with lower income (&lt;\$20,000/y (mean ± SE, 1.70 ± 0.14); \$20,000–\$49,000/y (mean ± SE, 2.31 ± 0.12; P&lt;.001) had ↑ financial burden</li> <li>Insurance: uninsured patients (mean ± SE, 2.67 ± 0.22; P&lt;.001) had ↑ burden</li> <li>Employment: unemployed (mean ± SE, 2.57 ± 0.28) or disabled patients (mean ± SE, 2.79 ± 0.07; P&lt;.001) had ↑ burden</li> </ul>                                                                                  | <ul style="list-style-type: none"> <li>Age: younger patients (&lt;50 y: mean ± SE, 2.51 ± 0.16; 50–64 y: mean ± SE, 2.13 ± 0.10; P&lt;.001) had ↑ burden</li> <li>Race: black patients (mean ± SE, 1.92 ± 0.13) and other/unknown patients (mean ± SE, 2.16 ± 0.26; P=.022) had ↑ burden</li> <li>Marital status: married/partnered patients (mean ± SE, 1.85 ± 0.08; P=.012) had ↑ burden</li> </ul> | <ul style="list-style-type: none"> <li>Chemotherapy: patients who received chemotherapy (Mean ± SE, 1.88 ± 0.06; P&lt;.001) had ↑ burden</li> </ul>                                                                                                        |

(continued on next page)  
Abbreviations: ASD, adjusted score difference; CCC, comprehensive cancer center; COST, Comprehensive Score for financial Toxicity; CRC, colorectal cancer; CRN, cost-related nonadherence; D, direct material burdens; EE, effect estimate; FPL, federal poverty level; GPH, general public hospital; HMO, health maintenance organization; I, indirect burdens; MCS, Mental Component Score; OFFS, objective family financial stress; OOP, out of pocket; OR, odds ratio; P, psychological burdens; PCS, Physical Component Score; QoL, quality of life.

**Table 4. Risk Factors of Financial Toxicity Burdens (cont.)**

| Reference<br>• Burden Type                  | Model<br>• Outcome                                                       | Socioeconomic                                                                                     | Demographic                                                                                                                                                                                                                                                                                                                    | Clinical                                                                                                                                                                                                                                                                                                                                                                                                                                                                                     |
|---------------------------------------------|--------------------------------------------------------------------------|---------------------------------------------------------------------------------------------------|--------------------------------------------------------------------------------------------------------------------------------------------------------------------------------------------------------------------------------------------------------------------------------------------------------------------------------|----------------------------------------------------------------------------------------------------------------------------------------------------------------------------------------------------------------------------------------------------------------------------------------------------------------------------------------------------------------------------------------------------------------------------------------------------------------------------------------------|
| Davidoff et al, 2013 <sup>32</sup><br>• D   | Generalized linear models<br>• OOP/Income >20%                           | • Insurance and income: patients with supplemental insurance and higher income had ↓ OOP spending | • Age: older patients had ↓ OOP spending                                                                                                                                                                                                                                                                                       | • Assets, comorbidity, and type of treatment: those with assets, comorbidity, and cancer-directed radiation or antineoplastic therapy had ↑ OOP spending                                                                                                                                                                                                                                                                                                                                     |
| Dowling et al, 2013 <sup>33</sup><br>• I    | Adjusted logistic regression<br>• Productivity loss                      |                                                                                                   |                                                                                                                                                                                                                                                                                                                                | • Site/Type of cancer at diagnosis: Patients with short survival cancer or multiple cancers had ↑ productivity loss ( $P < .05$ ), were more likely to accomplish less ( $P < .0001$ ), and be limited in the kind of work or activities engaged in because of physical health ( $P < .0001$ )                                                                                                                                                                                               |
| Goodwin et al, 2013 <sup>34</sup><br>• I, D | t test<br>• Mean % of income spent on OOP expenses<br>• Financial burden |                                                                                                   |                                                                                                                                                                                                                                                                                                                                | • Chemotherapy: patients receiving chemotherapy had ↑ mean % of income spent for OOP expenses during first 12 mo of therapy (38%) vs those not receiving chemotherapy (31%) ( $t_{6,13} = 2.03$ ; 95% CI, 0.82–12.44; $P = .025$ ); those receiving chemotherapy at time of survey had ↑ financial burden (52%) vs those not receiving chemotherapy.<br>• Duration of treatment: patients who received ≥4 y of treatment used ↓ % of income for OOP expenses vs those with <4 y of treatment |
| Kent et al, 2013 <sup>35</sup><br>• P, I    | Adjusted analyses<br>• Financial problems                                |                                                                                                   | • Age: younger patients (<40 y and those aged ≥65 y ( $P = .0001$ ))<br>• Race/Ethnicity: non-Hispanic black, Hispanic, and other patients had ↑ financial problems vs non-Hispanic white patients ( $P = .006$ )                                                                                                              | • Time since diagnosis: patients within <2 y had ↑ financial problems vs a longer period ( $P < .0001$ )<br>• Recurrence/Multiple cancer: patients with presence of either had ↑ financial problems vs otherwise ( $P = .049$ )<br>• Chemotherapy/Radiation: patients with either treatment(s) ↑ financial problems vs otherwise ( $P < .001$ )                                                                                                                                              |
| Ramsey et al, 2013 <sup>36</sup><br>• I     | Frequencies<br>• Bankruptcy                                              |                                                                                                   | All $P < .001$ : frequencies (%) represent distribution in bankruptcy vs no-bankruptcy groups<br>• Age: younger patients (<40 y, 19% vs 7%; 40–64 y, 62% vs 48%) had ↑ bankruptcy compared with aged ≥65 y<br>• Sex: female (56% vs 50%) had ↑ bankruptcy<br>• Race/Ethnicity: nonwhite patients (14% vs 12%) had ↑ bankruptcy | • Stage at diagnosis: patients with localized (59% vs 50%) or regional stage (25% vs 22%) disease had ↑ bankruptcy vs those with distant stage (13% vs 24%)<br>• Cancer site: patients with breast cancer (23% vs 17%) had ↑ bankruptcy; those with prostate cancer (13% vs 17%) had ↑ bankruptcy                                                                                                                                                                                            |

(continued on next page)

Abbreviations: ASD, adjusted score difference; CCC, comprehensive cancer center; COST, Comprehensive Score for financial Toxicity; CRC, colorectal cancer; CRN, cost-related nonadherence; D, direct material burdens; EE, effect estimate; FPL, federal poverty level; GPH, general public hospital; HMO, health maintenance organization; I, indirect burdens; MCS, Mental Component Score; OFFS, objective family financial stress; OOP, out of pocket; OR, odds ratio; P, psychological burdens; PCS, Physical Component Score; QoL, quality of life.

**eTable 4. Risk Factors of Financial Toxicity Burdens (cont.)**

| Reference<br>• Burden Type                    | Model<br>• Outcome                                                                          | Socioeconomic                                                                                                                                                                                                                                                                                                                                                                                                                                                                                                                    | Demographic                                                                                                                                                                                                                                                   | Clinical                                                                                                                                                                                                                                                                                                                                                                                                                                                                                                                                                                                                                                                                                    |
|-----------------------------------------------|---------------------------------------------------------------------------------------------|----------------------------------------------------------------------------------------------------------------------------------------------------------------------------------------------------------------------------------------------------------------------------------------------------------------------------------------------------------------------------------------------------------------------------------------------------------------------------------------------------------------------------------|---------------------------------------------------------------------------------------------------------------------------------------------------------------------------------------------------------------------------------------------------------------|---------------------------------------------------------------------------------------------------------------------------------------------------------------------------------------------------------------------------------------------------------------------------------------------------------------------------------------------------------------------------------------------------------------------------------------------------------------------------------------------------------------------------------------------------------------------------------------------------------------------------------------------------------------------------------------------|
| Wan et al, 2013 <sup>37</sup><br>• I          | Adjusted generalized linear modeling and linear regression<br>• Short-term disability costs | • Insurance: HMO vs non-HMO (P<.05) had ↑ short-term disability costs                                                                                                                                                                                                                                                                                                                                                                                                                                                            | • Age: older patients (P=.002) had ↑ short-term disability costs                                                                                                                                                                                              | <ul style="list-style-type: none"> <li>Chemotherapy: patients receiving chemotherapy (P&lt;.001) had ↑ short-term disability costs</li> <li>Early vs metastatic stage: patients with metastatic breast cancer had ↑ short-term disability days and costs at 12 mo postdiagnosis vs those with early-stage breast cancer (41.2 ± 61.4 vs 24.7 ± 44.7 d; \$6,166 ± \$9,194 vs \$3,690 ± \$6,673; both, P&lt;.001)</li> <li>Early vs metastatic stage: patients with metastatic breast cancer incurred 47.7% ↑ short-term disability costs overall vs those with early-stage breast cancer (\$3,953 with 95% CI, \$3,072–\$5,086 vs \$2,676 with 95% CI, \$2,360–\$3,034) at P=.009</li> </ul> |
| Meneses et al, 2012 <sup>38</sup><br>• P, I   | Generalized linear mixed models for repeated measures<br>• Economic burden                  |                                                                                                                                                                                                                                                                                                                                                                                                                                                                                                                                  |                                                                                                                                                                                                                                                               | <ul style="list-style-type: none"> <li>Time since treatment: economic burden ↓ with longer time interval since treatment; mean, 2.94 economic burden items at baseline (range, 0–11) vs 2.45 at 3 mo (range, 0–13), and 2.25 at 6 mo (range, 0–14); median, 2 at baseline and 1 at 3 and 6 mo</li> </ul>                                                                                                                                                                                                                                                                                                                                                                                    |
| Shankaran et al, 2012 <sup>39</sup><br>• P, I | Univariate analyses<br>• Financial hardship                                                 | <ul style="list-style-type: none"> <li>Annual income: ≤\$30,000 vs &gt;\$70,000/y (OR, 1.7; 95% CI, 0.8–3.9); \$30,000–\$50,000/y (OR, 4.5; 95% CI, 2.2–9.1) had ↑ hardship</li> <li>Insurance: Medicaid vs private had ↑ hardship (OR, 2.9; 95% CI, 1.0–8.0); Medicare had ↓ hardship (OR, 0.3; 95% CI, 0.2–0.6)</li> <li>Employment: presence of work disability, leave of absence, or unemployed vs employed had ↑ hardship (OR, 5.6; 95% CI, 2.4–13.3)</li> <li>Retired had ↓ hardship (OR, 0.4; 95% CI, 0.2–0.8)</li> </ul> | <ul style="list-style-type: none"> <li>Age: patients aged &lt;50 y vs ≥75 y had ↑ hardship (OR, 30.7; 95% CI, 6.6–143.9); 50–64 y (OR, 10.2; 95% CI, 2.3–44.6)</li> <li>Race: nonwhite vs white patients had ↑ hardship (OR, 3.2; 95% CI, 1.5–6.7)</li> </ul> |                                                                                                                                                                                                                                                                                                                                                                                                                                                                                                                                                                                                                                                                                             |
| Streeter et al, 2011 <sup>40</sup><br>• D, I  | Frequencies<br>• OOP costs                                                                  | <ul style="list-style-type: none"> <li>Type of insurance: ↑ proportion of patients who paid &gt;\$500 OOP for first oral chemotherapy claim in Medicare group compared with commercially insured group (6% vs 11%; P&lt;.001)</li> </ul>                                                                                                                                                                                                                                                                                         |                                                                                                                                                                                                                                                               |                                                                                                                                                                                                                                                                                                                                                                                                                                                                                                                                                                                                                                                                                             |
| Neugut et al, 2011 <sup>41</sup><br>• D, I    | Frequencies<br>• Copayment                                                                  |                                                                                                                                                                                                                                                                                                                                                                                                                                                                                                                                  | <ul style="list-style-type: none"> <li>Age: median copayment higher among younger patients (\$50) than older patients (\$40)</li> </ul>                                                                                                                       |                                                                                                                                                                                                                                                                                                                                                                                                                                                                                                                                                                                                                                                                                             |
| Markman & Luce, 2010 <sup>42</sup><br>• P, D  | Frequencies<br>• OOP expenses                                                               |                                                                                                                                                                                                                                                                                                                                                                                                                                                                                                                                  |                                                                                                                                                                                                                                                               | <ul style="list-style-type: none"> <li>Cancer site: prostate 20% with OOP &gt;\$5,000 vs breast 41%, colon 46%, lung 45%</li> </ul>                                                                                                                                                                                                                                                                                                                                                                                                                                                                                                                                                         |

(continued on next page)

Abbreviations: ASD, adjusted score difference; CCC, comprehensive cancer center; COST, Comprehensive Score for financial Toxicity; CRC, colorectal cancer; CRN, cost-related nonadherence; D, direct material burdens; EE, effect estimate; FPL, federal poverty level; GPH, general public hospital; HMO, health maintenance organization; I, indirect burdens; MCS, Mental Component Score; OFFS, objective family financial stress; OOP, out of pocket; OR, odds ratio; P, psychological burdens; PCS, Physical Component Score; QoL, quality of life.

**eTable 4. Risk Factors of Financial Toxicity Burdens (cont.)**

| Reference<br>• Burden Type                   | Model<br>• Outcome                                                      | Socioeconomic                                                                                                                                                                                                                                                                                                                                                                                                                    | Demographic                                                                                                                                                                                                                                                                                                                                                                                                                                                                                                                                                                                                                                          | Clinical                                                                                                                                                                                                                                                                                                                                                                                                                                                                                                                                            |
|----------------------------------------------|-------------------------------------------------------------------------|----------------------------------------------------------------------------------------------------------------------------------------------------------------------------------------------------------------------------------------------------------------------------------------------------------------------------------------------------------------------------------------------------------------------------------|------------------------------------------------------------------------------------------------------------------------------------------------------------------------------------------------------------------------------------------------------------------------------------------------------------------------------------------------------------------------------------------------------------------------------------------------------------------------------------------------------------------------------------------------------------------------------------------------------------------------------------------------------|-----------------------------------------------------------------------------------------------------------------------------------------------------------------------------------------------------------------------------------------------------------------------------------------------------------------------------------------------------------------------------------------------------------------------------------------------------------------------------------------------------------------------------------------------------|
| Pezzin et al, 2009 <sup>43</sup><br>• P      | Adjusted analyses<br>• Financial problems                               | <ul style="list-style-type: none"> <li>• Drug cost coverage; patients with none (OR, 4.5; 95% CI, 3.3–5.9) or partial coverage (OR, 3.6; 95% CI, 2.8–4.5) had ↑ financial problems</li> <li>• Income: patients with lower income (&lt;\$15,000 vs ≥\$50,000/y [OR, 1.7; 95% CI, 1.1–2.8], \$15,000–\$29,999/y [OR, 3.1; 95% CI, 2.3–4.3], or \$30,000–\$44,999/y [OR, 1.8; 95% CI, 1.3–2.5]) had ↑ financial problems</li> </ul> | <ul style="list-style-type: none"> <li>• Marital status: widowed vs married patients (OR, 0.6; 95% CI, 0.5–0.8) had ↓ financial problems</li> </ul>                                                                                                                                                                                                                                                                                                                                                                                                                                                                                                  | <ul style="list-style-type: none"> <li>• Treatment modality: patients on aromatase inhibitor vs tamoxifen (OR, 1.4; 95% CI, 1.1–1.7) had ↑ financial problems</li> </ul>                                                                                                                                                                                                                                                                                                                                                                            |
| Francoeur, 2005 <sup>44</sup><br>• P, I, D   | Structural equation modeling<br>• Disability days<br>• Financial strain | <ul style="list-style-type: none"> <li>• OFFS: patients experiencing OFFS reported higher subjective financial strain (<math>P &lt; .05</math>), difficulty paying bills (<math>P &lt; .005</math>), and inadequacy of their insurance to meet their needs (<math>P &lt; .005</math>)</li> </ul>                                                                                                                                 | <ul style="list-style-type: none"> <li>• Age: among patients with same level of financial stress, older patients perceived less financial strain from difficulty paying bills than younger patients (<math>P &lt; .005</math>)</li> <li>• Age and disability days: among patients reporting above-mean disability days, older patients perceived more financial strain about adequacy of insurance and finances in the future (<math>P &lt; .01</math>)</li> </ul>                                                                                                                                                                                   |                                                                                                                                                                                                                                                                                                                                                                                                                                                                                                                                                     |
| Langa et al, 2004 <sup>45</sup><br>• D       | Regression analyses<br>• OOP expenses                                   | <ul style="list-style-type: none"> <li>• Income status and currently receiving treatment: patients with low income spent 27% of income on OOP expenses compared with 5% of income by patients with high income with no cancer history</li> </ul>                                                                                                                                                                                 |                                                                                                                                                                                                                                                                                                                                                                                                                                                                                                                                                                                                                                                      |                                                                                                                                                                                                                                                                                                                                                                                                                                                                                                                                                     |
| Houts et al, 1985 <sup>46</sup><br>• P, I, D | Regression analyses<br>• OOP costs<br>• Wages lost                      | <ul style="list-style-type: none"> <li>• Income: patients with low income spent ↑ % of income on medical expenses (<math>\beta = -0.21</math>; <math>P &lt; .01</math>)</li> </ul>                                                                                                                                                                                                                                               | <ul style="list-style-type: none"> <li>• Age: younger patients had ↑ wages lost (<math>\beta = -0.27</math>; <math>P &lt; .01</math>), total cost (<math>\beta = -0.28</math>; <math>P &lt; .01</math>), and ↑ % income lost (<math>\beta = -0.24</math>; <math>P &lt; .01</math>)</li> <li>• Sex: females had ↑ wages lost (<math>\beta = -0.20</math>; <math>P &lt; .01</math>) and ↑ total costs incurred (<math>\beta = -0.16</math>; <math>P &lt; .05</math>)</li> <li>• Distance to treatment: patients residing at greater distance from treatment facility had ↑ OOP expenses (<math>\beta = 0.2</math>; <math>P &lt; .01</math>)</li> </ul> | <ul style="list-style-type: none"> <li>• Number of outpatient visits: patients with more visits had ↑ medical costs (<math>\beta = 0.22</math>; <math>P &lt; .01</math>) and ↑ OOP expenses (<math>\beta = 0.14</math>; <math>P &lt; .05</math>)</li> <li>• Number of days in hospital: patients with more days in hospital had ↑ OOP (<math>\beta = 0.42</math>; <math>P &lt; .01</math>), ↑ total costs (<math>\beta = 0.16</math>; <math>P &lt; .05</math>), and ↑ % income lost (<math>\beta = -0.2</math>; <math>P &lt; .01</math>)</li> </ul> |
| Smith et al, 2003 <sup>47</sup><br>• I       | Unadjusted Wilcoxon rank sum test<br>• Nontangible costs                |                                                                                                                                                                                                                                                                                                                                                                                                                                  |                                                                                                                                                                                                                                                                                                                                                                                                                                                                                                                                                                                                                                                      | <ul style="list-style-type: none"> <li>• Type of treatment: patients receiving radiation had ↑ costs vs endoscopic excision: Median number of treatments (35 vs 2), median travel distance (660 vs 150 miles), median travel time (1,440 vs 180 min), median hr work missed (76 vs 24 hr); <math>P &lt; .01</math></li> </ul>                                                                                                                                                                                                                       |

(continued on next page)

Abbreviations: ASD, adjusted score difference; CCC, comprehensive cancer center; COST, Comprehensive Score for financial Toxicity; CRC, colorectal cancer; CRN, cost-related nonadherence; D, direct material burdens; EE, effect estimate; FPL, federal poverty level; GPH, general public hospital; HMO, health maintenance organization; I, indirect burdens; MCS, Mental Component Score; OFFS, objective family financial stress; OOP, out of pocket; OR, odds ratio; P, psychological burdens; PCS, Physical Component Score; QoL, quality of life.

**Table 4. Risk Factors of Financial Toxicity Burdens (cont.)**

| Reference<br>• Burden Type                 | Model<br>• Outcome                                                           | Socioeconomic                                                                                                                                                                                                                                                        | Demographic                                                                                                                                                                                                                                                                                                                  | Clinical |
|--------------------------------------------|------------------------------------------------------------------------------|----------------------------------------------------------------------------------------------------------------------------------------------------------------------------------------------------------------------------------------------------------------------|------------------------------------------------------------------------------------------------------------------------------------------------------------------------------------------------------------------------------------------------------------------------------------------------------------------------------|----------|
| Lee & Khan, 2016 <sup>48</sup><br>• I      | Adjusted logistic regression<br>• CRN                                        | <ul style="list-style-type: none"> <li>Sex and insurance status: women with private health insurance (OR, 2.72; 95% CI, 1.94–3.79; P&lt;.0001) and uninsured women (OR, 20.63; 95% CI, 14.94–28.47) reported ↑ CRN than men with private health insurance</li> </ul> | <ul style="list-style-type: none"> <li>Sex: women reported ↑ CRN (OR, 1.27; 95% CI, 1.06–1.53) compared with men</li> </ul>                                                                                                                                                                                                  |          |
| Lee & Salloum, 2016 <sup>49</sup><br>• I   | Adjusted logistic regression<br>• CRN                                        |                                                                                                                                                                                                                                                                      | <ul style="list-style-type: none"> <li>Age and race: among patients aged 18–64 y, black (OR, 1.07; 95% CI, 0.83–1.37) and Hispanic patients (OR, 1.61; 95% CI, 1.23–2.10) had ↑ CRN; among patients aged ≥65 y, black (OR, 2.64; 95% CI, 1.73–4.01) and Hispanic patients (OR, 2.07; 95% CI, 1.32–3.24) had ↑ CRN</li> </ul> |          |
| Palmer et al, 2015 <sup>21</sup><br>• P, I | Adjusted logistic regression<br>• Cost-related barriers to survivorship care | <ul style="list-style-type: none"> <li>Insurance: patients with public insurance (OR, 4.82; 95% CI, 1.14–20.43) and uninsured patients (OR, 31.01; 95% CI, 2.67–360.5) reported ↑ barriers than private or both private and public insurance</li> </ul>              |                                                                                                                                                                                                                                                                                                                              |          |

Abbreviations: ASD, adjusted score difference; CCC, comprehensive cancer center; COST, Comprehensive Score for financial Toxicity; CRC, colorectal cancer; CRN, cost-related nonadherence; D, direct material burdens; EE, effect estimate; FPL, federal poverty level; GPH, general public hospital; HMO, health maintenance organization; I, indirect burdens; MCS, Mental Component Score; OFFS, objective family financial stress; OOP, out of pocket; OR, odds ratio; P, psychological burdens; PCS, Physical Component Score; QoL, quality of life.

(references on next page)

## eTable 4. Risk Factors of Financial Toxicity Burdens (cont.)

### References

1. Wheeler SB, Spencer JC, Pinheiro LC, et al. Financial impact of breast cancer in black versus white women. *J Clin Oncol* 2018;36:1695–1701.
2. de Souza JA, Yap BJ, Wroblewski K, et al. Measuring financial toxicity as a clinically relevant patient-reported outcome: the validation of the Comprehensive Score for financial Toxicity (COST). *Cancer* 2017;123:476–484.
3. Meeker CR, Wong YN, Egleston BL, et al. Distress and financial distress in adults with cancer: an age-based analysis. *J Natl Compr Canc Netw* 2017;15:1224–1233.
4. Pisu M, Azuero A, Benz R, et al. Out-of-pocket costs and burden among rural breast cancer survivors. *Cancer Med* 2017;6:572–581.
5. Abel GA, Albelda R, Khera N, et al. Financial hardship and patient-reported outcomes after hematopoietic cell transplantation. *Biol Blood Marrow Transplant* 2016;22:1504–1510.
6. Banegas MP, Guy GP Jr, de Moor JS, et al. For working-age cancer survivors, medical debt and bankruptcy create financial hardships. *Health Aff (Millwood)* 2016;35:54–61.
7. Chongpison Y, Hornbrook MC, Harris RB, et al. Self-reported depression and perceived financial burden among long-term rectal cancer survivors. *Psychooncology* 2016;25:1350–1356.
8. Kale HP, Carroll NV. Self-reported financial burden of cancer care and its effect on physical and mental health-related quality of life among US cancer survivors. *Cancer* 2016;122:283–289.
9. Lathan CS, Cronin A, Tucker-Seeley R, et al. Association of financial strain with symptom burden and quality of life for patients with lung or colorectal cancer. *J Clin Oncol* 2016;34:1732–1740.
10. Narang AK, Nicholas LH. Out-of-pocket spending and financial burden among Medicare beneficiaries with cancer. *JAMA Oncol* 2017;3:757–765.
11. Ramsey SD, Bansal A, Fedorenko CR, et al. Financial insolvency as a risk factor for early mortality among patients with cancer. *J Clin Oncol* 2016;34:980–986.
12. Whitney RL, Bell JF, Reed SC, et al. Predictors of financial difficulties and work modifications among cancer survivors in the United States. *J Cancer Surviv* 2016;10:241–250.
13. Wong YN, Schluchter MD, Albrecht TL, et al. Financial concerns about participation in clinical trials among patients with cancer. *J Clin Oncol* 2016;34:479–487.
14. Yabroff KR, Dowling EC, Guy GP Jr, et al. Financial hardship associated with cancer in the United States: findings from a population-based sample of adult cancer survivors. *J Clin Oncol* 2016;34:259–267.
15. Zheng Z, Yabroff KR, Guy GP Jr, et al. Annual medical expenditure and productivity loss among colorectal, female breast, and prostate cancer survivors in the United States. *J Natl Cancer Inst* 2015;108:cjv382.
16. Callahan C, Brintzenhofszoc K. Financial quality of life for patients with cancer: an exploratory study. *J Psychosoc Oncol* 2015;33:377–394.
17. Delgado-Guay M, Ferrer J, Rieber AG, et al. Financial distress and its associations with physical and emotional symptoms and quality of life among advanced cancer patients. *Oncologist* 2015;20:1092–1098.
18. Guy GP Jr, Yabroff KR, Ekwueme DU, et al. Healthcare expenditure burden among non-elderly cancer survivors, 2008–2012. *Am J Prev Med* 2015;49(Suppl 5):S489–497.
19. Huntington SF, Weiss BM, Vogl DT, et al. Financial toxicity in insured patients with multiple myeloma: a cross-sectional pilot study. *Lancet Haematol* 2015;2:e408–416.
20. Jones WC, Parry C, Devine S, et al. Prevalence and predictors of distress in posttreatment adult leukemia and lymphoma survivors. *J Psychosoc Oncol* 2015;33:124–141.
21. Palmer NR, Weaver KE, Hauser SP, et al. Disparities in barriers to follow-up care between African American and White breast cancer survivors. *Support Care Cancer* 2015;23:3201–3209.
22. Pisu M, Kenzik KM, Oster RA, et al. Economic hardship of minority and non-minority cancer survivors 1 year after diagnosis: another long-term effect of cancer? *Cancer* 2015;121:1257–1264.
23. Tucker-Seeley RD, Abel GA, Uno H, et al. Financial hardship and the intensity of medical care received near death. *Psychooncology* 2015;24:572–578.
24. Zafar SY, McNeil RB, Thomas CM, et al. Population-based assessment of cancer survivors' financial burden and quality of life: a prospective cohort study. *J Oncol Pract* 2015;11:145–150.
25. Fenn KM, Evans SB, McCorkle R, et al. Impact of financial burden of cancer on survivors' quality of life. *J Oncol Pract* 2014;10:332–338.
26. Jaggi R, Hawley ST, Abrahamse P, et al. Impact of adjuvant chemotherapy on long-term employment of survivors of early-stage breast cancer. *Cancer* 2014;120:1854–1862.
27. Jaggi R, Pottow JAE, Griffith KA, et al. Long-term financial burden of breast cancer: experiences of a diverse cohort of survivors identified through population-based registries. *J Clin Oncol* 2014;32:1269–1276.
28. Khera N, Chang YH, Hashmi S, et al. Financial burden in recipients of allogeneic hematopoietic cell transplantation. *Biol Blood Marrow Transplant* 2014;20:1375–1381.
29. Martin MY, Fouad MN, Oster RA, et al. What do cancer patients worry about when making decisions about treatment? Variation across racial/ethnic groups. *Support Care Cancer* 2014;22:233–244.
30. Regenbogen SE, Veenstra CM, Hawley ST, et al. The personal financial burden of complications after colorectal cancer surgery. *Cancer* 2014;120:3074–3081.
31. Veenstra CM, Regenbogen SE, Hawley ST, et al. A composite measure of personal financial burden among patients with stage III colorectal cancer. *Med Care* 2014;52:957–962.
32. Davidoff AJ, Erten M, Shaffer T, et al. Out-of-pocket health care expenditure burden for Medicare beneficiaries with cancer. *Cancer* 2013;119:1257–1265.
33. Dowling EC, Chawla N, Forsythe LP, et al. Lost productivity and burden of illness in cancer survivors with and without other chronic conditions. *Cancer* 2013;119:3393–3401.
34. Goodwin JA, Coleman EA, Sullivan E, et al. Personal financial effects of multiple myeloma and its treatment. *Cancer Nurs* 2013;36:301–308.
35. Kent EE, Forsythe LP, Yabroff KR, et al. Are survivors who report cancer-related financial problems more likely to forgo or delay medical care? *Cancer* 2013;119:3710–3717.
36. Ramsey S, Blough D, Kirchoff A, et al. Washington State cancer patients found to be at greater risk for bankruptcy than people without a cancer diagnosis. *Health Aff (Millwood)* 2013;32:1143–1152.
37. Wan Y, Gao X, Mehta S, et al. Indirect costs associated with metastatic breast cancer. *J Med Econ* 2013;16:1169–1178.
38. Meneses K, Azuero A, Hassey L, et al. Does economic burden influence quality of life in breast cancer survivors? *Gynecol Oncol* 2012;124:437–443.
39. Shankaran V, Jolly S, Blough D, et al. Risk factors for financial hardship in patients receiving adjuvant chemotherapy for colon cancer: a population-based exploratory analysis. *J Clin Oncol* 2012;30:1608–1614.
40. Streeter SB, Schwartzberg L, Husain N, et al. Patient and plan characteristics affecting abandonment of oral oncolytic prescriptions. *Am J Manag Care* 2011;17(Suppl 5):SP38–44.
41. Neugut AI, Subar M, Wilde ET, et al. Association between prescription co-payment amount and compliance with adjuvant hormonal therapy in women with early-stage breast cancer. *J Clin Oncol* 2011;29:2534–2542.
42. Markman M, Luce R. Impact of the cost of cancer treatment: an internet-based survey. *J Oncol Pract* 2010;6:69–73.
43. Pezzin LE, O'Neil MB, Nattinger AB. The economic consequences of breast cancer adjuvant hormonal treatments. *J Gen Intern Med* 2009;24(Suppl 2):S446–450.
44. Francoeur RB. Cumulative financial stress and strain in palliative radiation outpatients: the role of age and disability. *Acta Oncol* 2005;44:369–381.
45. Langa KM, Fendrick AM, Chernew ME, et al. Out-of-pocket health-care expenditures among older Americans with cancer. *Value Health* 2004;7:186–194.
46. Houts PS, Harvey HA, Simmonds MA, et al. Characteristics of patients at risk for financial burden because of cancer and its treatment. *J Psychosoc Oncol* 1985;3:15–22.
47. Smith JC, Johnson JT, Coggnett DM, et al. Quality of life, functional outcome, and costs of early glottic cancer. *Laryngoscope* 2003;113:68–76.
48. Lee M, Khan MM. Gender differences in cost-related medication non-adherence among cancer survivors. *J Cancer Surviv* 2016;10:384–393.
49. Lee M, Salloum RG. Racial and ethnic disparities in cost-related medication non-adherence among cancer survivors. *J Cancer Surviv* 2016;10:534–544.

**Table 5. Financial Toxicity Burdens and Health Outcomes**

| Reference<br>• Burden Type                                  | Statistical Analysis<br>• Financial Toxicity Burden Measure                   | Dependent Variable and/or Outcome Measures<br>• Association of Financial Toxicity Burden Measure With Outcome Measure(s)                                                                                                                                                                                                                                                                                                                                                                                                                                                                                                                                                                                                                                                                                                                                                      |
|-------------------------------------------------------------|-------------------------------------------------------------------------------|-------------------------------------------------------------------------------------------------------------------------------------------------------------------------------------------------------------------------------------------------------------------------------------------------------------------------------------------------------------------------------------------------------------------------------------------------------------------------------------------------------------------------------------------------------------------------------------------------------------------------------------------------------------------------------------------------------------------------------------------------------------------------------------------------------------------------------------------------------------------------------|
| Financial toxicity burden and adherence to cancer treatment |                                                                               |                                                                                                                                                                                                                                                                                                                                                                                                                                                                                                                                                                                                                                                                                                                                                                                                                                                                               |
| Farias & Du, 2017 <sup>1</sup><br>• D                       | Adjusted logistic regression<br>• OOP costs                                   | <ul style="list-style-type: none"> <li>• Adherence to adjuvant endocrine therapy (aromatase inhibitor or tamoxifen)</li> <li>• ↑ OOP was associated with ↓ adherence</li> <li>• Compared with OOP cost \$0-\$2.65 (reference), OR of adherence for OOP cost \$2.66-\$10.00: OR, 0.81; 95% CI, 0.71-0.94; OOP cost \$10.01-\$41.25: OR, 0.65, 95% CI, 0.56-0.76; OOP cost \$41.26-\$105.55: OR, 0.21, 95% CI, 0.18-0.24; OOP cost &gt;\$105.55: OR, 0.31; 95% CI, 0.26-0.37</li> </ul>                                                                                                                                                                                                                                                                                                                                                                                         |
| Farias et al, 2018 <sup>2</sup><br>• D                      | Adjusted logistic regression<br>• OOP costs                                   | <ul style="list-style-type: none"> <li>• Adherence to adjuvant endocrine therapy (aromatase inhibitor or tamoxifen)</li> <li>• ↑ OOP was associated with ↓ adherence</li> <li>• Compared with OOP cost \$0-\$4.99 (reference), RR of adherence for OOP cost of \$5.00-\$9.99: RR, 1.01; 95% CI, 0.97-1.05; OOP cost \$10.00-\$14.99: RR, 0.93; 95% CI, 0.88-0.98; OOP cost \$15.00-\$19.99: RR, 0.92; 95% CI, 0.85-0.98; OOP cost ≥\$20.00: RR, 0.94; 95% CI, 0.89-0.99</li> </ul>                                                                                                                                                                                                                                                                                                                                                                                            |
| Bender et al, 2014 <sup>3</sup><br>• P, I                   | Effect modifier in conditional regression<br>• Financial hardship             | <ul style="list-style-type: none"> <li>• Adherence to endocrine therapy</li> <li>• ↑ financial hardship measured by OOP cost perception was effect modifier of association between negative mood and adherence to endocrine therapy (P&lt;.001)</li> </ul>                                                                                                                                                                                                                                                                                                                                                                                                                                                                                                                                                                                                                    |
| Bestvina et al, 2014 <sup>4</sup><br>• P, I                 | Adjusted logistic regression<br>• Financial burden                            | <ul style="list-style-type: none"> <li>• Medication nonadherence</li> <li>• Nonadherence ↑ among patients who had cost discussions (OR, 2.58; 95% CI, 1.14-5.85), experienced ↑ financial burden (OR, 2.89; 95% CI, 1.41-5.89) and experienced ↑ financial distress (OR, 1.64; 95% CI, 1.38-1.96)</li> </ul>                                                                                                                                                                                                                                                                                                                                                                                                                                                                                                                                                                  |
| Dusetzina et al, 2014 <sup>5</sup><br>• D                   | Generalized estimating equations<br>• Copayment                               | <ul style="list-style-type: none"> <li>• Discontinuation: 17% of patients with ↑ copayment discontinued therapy during first 180 days; with increased risk of discontinuation compared with patients with ↓ copayment (RR=1.70; 95% CI, 1.30-2.22)</li> <li>• Nonadherence: 30% of patients with ↑ copayment were nonadherent to therapy; with increased risk of nonadherence (RR=1.42, 95% CI, 1.19-1.69)</li> </ul>                                                                                                                                                                                                                                                                                                                                                                                                                                                         |
| Jagsi et al, 2014 <sup>6</sup><br>• P, I                    | Frequency                                                                     | <ul style="list-style-type: none"> <li>• Treatment nonadherence: In patients with breast cancer</li> <li>• Frequency of going without medications (5%), taking less than recommended treatment (4%), and missing doctor's appointments (8%)</li> </ul>                                                                                                                                                                                                                                                                                                                                                                                                                                                                                                                                                                                                                        |
| Zafar et al, 2013 <sup>7</sup><br>• D                       | Frequency                                                                     | <ul style="list-style-type: none"> <li>• Healthcare noncompliance: in patients with cancer needing copayment assistance</li> <li>• Frequency of taking less than prescribed medications (20%), filling part of prescription (19%), avoiding filling prescription (24%), avoiding procedures (7%) or tests (9%), spreading out chemotherapy/appointments (7%), and skipping appointments (4%)</li> </ul>                                                                                                                                                                                                                                                                                                                                                                                                                                                                       |
| Zullig et al, 2013 <sup>8</sup><br>• P, I                   | Frequency and adjusted logistic regression<br>• Subjective financial distress | <ul style="list-style-type: none"> <li>• Prescription medication nonadherence</li> <li>• Overall nonadherence 45%, of which 4% took medications prescribed for another person, 22% took less than prescribed amount, 25% filled only part of prescription, and 27% did not fill the prescription because of medication cost.</li> <li>• In subset of nonadherent patients: 69% asked doctor for less expensive medicine, 66% reduced spending on basics like food or clothing, 26% purchased over-the-counter product, 58% shopped for lowest priced medication, 68% borrowed money or used credit card to pay, and 69% obtained medication samples.</li> <li>• Although statistically significant in unadjusted analyses, in adjusted analysis, ↑ subjective financial distress not associated with medication nonadherence (OR, 1.60; 95% CI, 0.71-3.60; P=.26).</li> </ul> |
| Shankaran et al, 2012 <sup>9</sup><br>• P, I                | Adjusted logistic regression<br>• Perceived financial burden                  | <ul style="list-style-type: none"> <li>• Economically motivated treatment nonadherence</li> <li>• Nonadherence ↑ among younger &lt;50y (P=.04), low income ≤\$30,000/y (P=.012), and unemployed/disabled/leave of absence (P=.05)</li> </ul>                                                                                                                                                                                                                                                                                                                                                                                                                                                                                                                                                                                                                                  |

(continued on next page)  
Abbreviations: AMD, adjusted mean difference; BSI, Brief Symptom Inventory; COST, Comprehensive Score for financial Toxicity; CRC, colorectal cancer; D, direct material burdens; FACT-B, Functional Assessment of Cancer Therapy-Breast tool; FACT-G, Functional Assessment of Cancer Therapy-General tool; HR, hazard ratio; I, indirect burdens; OOP, out of pocket; OR, odds ratio; P, psychological burdens; PHQ, Patient Health Questionnaire; QoL, quality of life; RR, risk ratio; SE, standard error.



eTable 5. Financial Toxicity Burdens and Health Outcomes (cont.)

| Reference                                                           |                                                                   | Statistical Analysis                |                                                                                                                                                                                                                                                                                                                                                                                                                                                                                                                                                                                                                                                                                  | Dependent Variable and/or Outcome Measures |  |
|---------------------------------------------------------------------|-------------------------------------------------------------------|-------------------------------------|----------------------------------------------------------------------------------------------------------------------------------------------------------------------------------------------------------------------------------------------------------------------------------------------------------------------------------------------------------------------------------------------------------------------------------------------------------------------------------------------------------------------------------------------------------------------------------------------------------------------------------------------------------------------------------|--------------------------------------------|--|
| Burden Type                                                         | Financial Toxicity Burden Measure                                 | Financial Toxicity Burden Measure   | Association of Financial Toxicity Burden Measure With Outcome Measure(s)                                                                                                                                                                                                                                                                                                                                                                                                                                                                                                                                                                                                         |                                            |  |
| Financial toxicity burden and adherence to cancer treatment (cont.) |                                                                   |                                     |                                                                                                                                                                                                                                                                                                                                                                                                                                                                                                                                                                                                                                                                                  |                                            |  |
| Neugut et al, 2011 <sup>10</sup>                                    | Adjusted logistic regression and Cox proportional hazard analyses | • Copayment                         | <ul style="list-style-type: none"> <li>• Nonpersistence and nonadherence to recommended medications</li> <li>• ↑ copayment associated with ↑ nonpersistence and ↑ nonadherence</li> <li>• Among women of Medicare-eligible age, compared with copayment &lt;\$30 (ref), OR of persistence for copayment of \$30–\$89.99: OR, 0.69; 95% CI, 0.62–0.75</li> <li>• Among women aged &lt;65 y, compared with &lt;\$30 (ref), copayment of &gt;\$90: OR, 0.72; 95% CI, 0.65–0.80</li> <li>• Among women of Medicare-eligible age, compared with copayment &lt;\$30 (ref), OR of adherence \$30–\$89.99: OR, 0.83; 95% CI, 0.72–0.96; &gt;\$90: OR, 0.70; 95% CI, 0.60–0.82</li> </ul> |                                            |  |
| Streeter et al, 2011 <sup>11</sup>                                  | Adjusted logistic regression                                      | • Cost-sharing                      | <ul style="list-style-type: none"> <li>• Abandonment of oral or intravenous cancer treatment</li> <li>• ↑ cost sharing associated with ↑ abandonment</li> <li>• Compared with cost sharing of ≤\$100 (ref), OR of abandonment for \$101–\$150: OR, 1.84; 95% CI, 1.23–2.75; \$151–\$200: OR, 1.51; 95% CI, 0.97–2.34; \$201–\$250: OR, 2.30; 95% CI, 1.31–4.04; \$251–\$350: OR, 2.31; 95% CI, 1.59–3.36; cost sharing \$351–\$500: OR, 3.28; 95% CI, 2.20–4.88; cost sharing &gt;\$500: OR, 4.46; 95% CI, 3.80–5.22</li> </ul>                                                                                                                                                  |                                            |  |
| Markman & Luce, 2010 <sup>12</sup>                                  | Frequency                                                         | • Financial impact                  | <ul style="list-style-type: none"> <li>• Not to receive a recommended treatment</li> <li>• 10% of patients decided not to receive a treatment because it was too expensive; 25% for patients with annual income &lt;\$40,000</li> </ul>                                                                                                                                                                                                                                                                                                                                                                                                                                          |                                            |  |
| Pezzin et al, 2009 <sup>13</sup>                                    | Adjusted logistic regression                                      | • Insurance prescription coverage   | <ul style="list-style-type: none"> <li>• Making appropriate switch between adjuvant endocrine therapies (from tamoxifen to aromatase inhibitor)</li> <li>• Compared with full drug coverage, women with no prescription drug coverage ↓ likelihood of making appropriate switch to aromatase inhibitor: OR, 0.7; 95% CI, 0.5–0.9; partial prescription drug coverage: OR, 0.8; 95% CI, 0.7–1.0</li> <li>• Women near poverty (income \$15,000–\$29,000/y) had ↓ likelihood of making appropriate switch: OR, 0.6; 95% CI, 0.4–0.9</li> </ul>                                                                                                                                     |                                            |  |
| Huntington et al, 2015 <sup>14</sup>                                | Fisher exact test                                                 | • Financial burden (COST tool)      | <ul style="list-style-type: none"> <li>• Patients with ↑ financial burden (COST score ≤23) more likely to: <ul style="list-style-type: none"> <li>• Delay initiation of myeloma treatment: 29% (P=.003)</li> <li>• Fill only part of myeloma therapy prescription: 22% (P=.0077)</li> <li>• Fill only part of noncancer medication: 16% (P=.0019)</li> <li>• Stop myeloma therapy prescription: 22% (P=.0011)</li> <li>• Stop noncancer medication: 20% (P=.0077)</li> <li>• Refuse recommended test because of cost: 18% (P=.016)</li> <li>• Skip clinic visits: 12% (P=.027)</li> </ul> </li> </ul>                                                                            |                                            |  |
| Financial toxicity burden and adherence to general healthcare       |                                                                   |                                     |                                                                                                                                                                                                                                                                                                                                                                                                                                                                                                                                                                                                                                                                                  |                                            |  |
| Nipp et al, 2016 <sup>15</sup>                                      | Frequency                                                         |                                     | <ul style="list-style-type: none"> <li>• Use of healthcare-altering cost-coping strategies</li> <li>• Overall, 39% used ≥1 cost-coping strategies, 28% did not fill prescriptions, 22% took less than recommended medications, 10% missed a medical test, 8% missed a procedure, and 6% missed an appointment.</li> </ul>                                                                                                                                                                                                                                                                                                                                                        |                                            |  |
| Guy et al, 2015 <sup>16</sup>                                       | Adjusted logistic regression                                      | • OOP burden among cancer survivors | <ul style="list-style-type: none"> <li>• Unable to obtain necessary medical care: patients with ↑ OOP burden had ↑ inability to obtain necessary medical care (19.2% vs 12.5%; P=.002)</li> <li>• Delaying necessary medical care: patients with ↑ OOP burden ↑ delayed medical care (21.6% vs 13.8%; P=.002)</li> <li>• Lower breast cancer screening: patients with ↑ OOP burden had ↓ screening rates among age-appropriate women (63.2% vs 75.9%; P=.02)</li> </ul>                                                                                                                                                                                                          |                                            |  |
| Khera et al, 2014 <sup>17</sup>                                     | Frequency and adjusted logistic regression                        | • Financial burden                  | <ul style="list-style-type: none"> <li>• Cost-related treatment nonadherence</li> <li>• Overall, 21% reported not making a physician appointment or having a medical test performed due to cost</li> <li>• Use of medical service, eg, physical therapy, deferred by, 28% due to cost</li> <li>• Younger patients (OR for per 5-y increase in age: 0.82; 95% CI, 0.6–0.9) and lower educational level (OR for ≤ high school vs 4-y degree: OR, 5.0; 95% CI, 1.7–15) more likely to exhibit deleterious health behaviors (including treatment nonadherence) due to cost concerns</li> </ul>                                                                                       |                                            |  |

(continued on next page)

Abbreviations: AMD, adjusted mean difference; BSI, Brief Symptom Inventory; COST, Comprehensive Score for financial Toxicity; CRC, colorectal cancer; D, direct material burdens; FACT-B, Functional Assessment of Cancer Therapy-Breast tool; FACT-G, Functional Assessment of Cancer Therapy-General tool; HR, hazard ratio; I, indirect burdens; OOP, out of pocket; OR, odds ratio; P, psychological burdens; PHQ, Patient Health Questionnaire; QoL, quality of life; RR, risk ratio; SE, standard error.

**eTable 5. Financial Toxicity Burdens and Health Outcomes (cont.)**

| Reference<br>• Burden Type                                            | Statistical Analysis<br>• Financial Toxicity Burden Measure                 | Dependent Variable and/or Outcome Measures<br>• Association of Financial Toxicity Burden Measure With Outcome Measure(s)                                                                                                                                                                                                                                                                                                                                                                                                                                                                |
|-----------------------------------------------------------------------|-----------------------------------------------------------------------------|-----------------------------------------------------------------------------------------------------------------------------------------------------------------------------------------------------------------------------------------------------------------------------------------------------------------------------------------------------------------------------------------------------------------------------------------------------------------------------------------------------------------------------------------------------------------------------------------|
| Financial toxicity burden and adherence to general healthcare (cont.) |                                                                             |                                                                                                                                                                                                                                                                                                                                                                                                                                                                                                                                                                                         |
| Kent et al, 2013 <sup>18</sup><br>• P, I                              | Frequency and adjusted logistic regression<br>• Financial problems          | <ul style="list-style-type: none"> <li>• Delay/Forgo care</li> <li>• Patients reporting ↑ financial problems ↑ likely to report delaying medical care (18.5% vs 7.4%; <math>P &lt; .0001</math>) or forgoing medical care (13.5% vs 5.1%; <math>P &lt; .0001</math>), prescription medications (13.8% vs 7.7%; <math>P = .001</math>), dental care (20.0% vs 8.3%; <math>P &lt; .0001</math>), eyeglasses (13.7% vs 5.9%; <math>P &lt; .0001</math>), or mental health care (9.7% vs 7.1%; <math>P = .03</math>) compared with patients without financial problems</li> </ul>           |
| Khera et al, 2011 <sup>19</sup><br>• P, I                             | Frequency and ordinal regression analyses<br>• Concerns about medical costs | <ul style="list-style-type: none"> <li>• Adherence to preventive healthcare</li> <li>• ↑ cost concerns were associated with ↓ adherence to preventive health care: cutting back on prescribed medication (10%), not purchasing medication (11%), avoiding doctor's appointments (15%), not using physical therapy (13%), and not having a medical test performed (12%); 26% reported <math>\geq 1</math> behavior</li> <li>• ↑ concerns associated with ↓ adherence rates (OR, 1.48; 95% CI, 1.15–1.89)</li> </ul>                                                                      |
| Weaver et al, 2010 <sup>20</sup><br>• I                               | Frequency                                                                   | <ul style="list-style-type: none"> <li>• Nonadherence to general healthcare</li> <li>• Forgo care (frequency, 8%), delay care (11%), forgo prescription medications (10%), forgo dental care (11%), forgo mental health care (3%)</li> </ul>                                                                                                                                                                                                                                                                                                                                            |
| Financial toxicity burden and healthcare decision-making              |                                                                             |                                                                                                                                                                                                                                                                                                                                                                                                                                                                                                                                                                                         |
| DiMartino et al, 2017 <sup>21</sup><br>• I                            | Binary logit model<br>• Financial hardship                                  | <ul style="list-style-type: none"> <li>• Having survivorship care planning discussions with provider</li> <li>• ↑ financial hardship associated with ↓ discussions with β coefficient, 0.74; SE, 0.30; mean marginal effect, 6.6%; <math>P &lt; .05</math></li> </ul>                                                                                                                                                                                                                                                                                                                   |
| Wong et al, 2016 <sup>22</sup><br>• P                                 | Adjusted linear regression<br>• Financial concern                           | <ul style="list-style-type: none"> <li>• Self-efficacy: patients with ↑ financial concern had ↓ self-efficacy in treatment-related decision-making (<math>P = .004</math>)</li> <li>• Preparation for decision-making: patients with ↑ financial concern had ↓ preparation for decision-making (<math>P &lt; .001</math>)</li> <li>• Subjective distress: patients with ↑ financial concern had ↑ distress (<math>P &lt; .001</math>)</li> <li>• Decisional conflict: patients with ↑ financial concern had ↑ decisional conflict (<math>P &lt; .001</math>)</li> </ul>                 |
| Overall survival                                                      |                                                                             |                                                                                                                                                                                                                                                                                                                                                                                                                                                                                                                                                                                         |
| Ramsey et al, 2016 <sup>23</sup><br>• I                               | Proportional hazards regression<br>• Bankruptcy                             | <ul style="list-style-type: none"> <li>• Overall survival</li> <li>• All-cause mortality ↑ in patients who filed for bankruptcy vs patients who did not: HR, 1.79; 95% CI, 1.64–1.96</li> </ul>                                                                                                                                                                                                                                                                                                                                                                                         |
| QoL                                                                   |                                                                             |                                                                                                                                                                                                                                                                                                                                                                                                                                                                                                                                                                                         |
| de Souza et al, 2017 <sup>24</sup><br>• P                             | Pearson correlation<br>• Financial toxicity (COST tool)                     | <ul style="list-style-type: none"> <li>• Health-related QoL</li> <li>• Measured using two scales: FACT-G and EORTC-QoL</li> <li>• Adjusted correlation between COST measure and both FACT-G and EORTC-QoL statistically significant</li> <li>• FACT-G <math>r = 0.42</math> (<math>P &lt; .001</math>); EORTC-QoL <math>r = 0.33</math> (<math>P &lt; .001</math>)</li> </ul>                                                                                                                                                                                                           |
| Abel et al, 2016 <sup>25</sup><br>• P, I                              | Adjusted logistic regression<br>• Financial hardship                        | <ul style="list-style-type: none"> <li>• QoL below median: patients experiencing any hardship (OR, 2.90; 95% CI, 1.7–4.9) or all 3 hardships (OR, 2.16; 95% CI, 0.99–4.7) had ↑ odds of QoL below median.</li> <li>• Self-reported health below median: patients experiencing any hardship (OR, 2.18; 95% CI, 1.3–3.6) had ↑ odds of self-reported health below median.</li> <li>• Perceived stress above median: patients experiencing any hardship (OR, 2.08; 95% CI, 1.3–3.5) or all 3 hardships (OR, 3.14; 95% CI, 1.4–6.8) had ↑ odds of perceived stress above median.</li> </ul> |
| Chongpison et al, 2016 <sup>26</sup><br>• P                           | Adjusted linear regression<br>• Financial burden                            | <ul style="list-style-type: none"> <li>• Depression: survivors with self-reported depression (in past 30 days from survey) perceived ↑ financial burden (adjusted mean, 3.01; 95% CI, 2.57–3.45) compared with patients reporting no depression (adjusted mean, 1.67; 95% CI, 1.43–1.91)</li> </ul>                                                                                                                                                                                                                                                                                     |

(continued on next page)  
Abbreviations: AMD, adjusted mean difference; BSI, Brief Symptom Inventory; COST, Comprehensive Score for financial Toxicity; CRC, colorectal cancer; D, direct material burdens; FACT-B, Functional Assessment of Cancer Therapy-Breast tool; FACT-G, Functional Assessment of Cancer Therapy-General tool; HR, hazard ratio; I, indirect burdens; OOP, out of pocket; OR, odds ratio; P, psychological burdens; PHQ, Patient Health Questionnaire; QoL, quality of life; RR, risk ratio; SE, standard error.

Table 5. Financial Toxicity Burdens and Health Outcomes (cont.)

| Reference<br>• Burden Type                       | Statistical Analysis<br>• Financial Toxicity Burden Measure                                    | Dependent Variable and/or Outcome Measures<br>• Association of Financial Toxicity Burden Measure With Outcome Measure(s)                                                                                                                                                                                                                                                                                                                                                                                                                                                                                                                                                                                                 |
|--------------------------------------------------|------------------------------------------------------------------------------------------------|--------------------------------------------------------------------------------------------------------------------------------------------------------------------------------------------------------------------------------------------------------------------------------------------------------------------------------------------------------------------------------------------------------------------------------------------------------------------------------------------------------------------------------------------------------------------------------------------------------------------------------------------------------------------------------------------------------------------------|
| QoL (cont.)                                      |                                                                                                |                                                                                                                                                                                                                                                                                                                                                                                                                                                                                                                                                                                                                                                                                                                          |
| Delgado-Guay et al, 2016 <sup>27</sup><br>• P    | Adjusted logistic regression<br>• Financial distress                                           | <ul style="list-style-type: none"> <li>• <u>Spiritual pain</u>: associated with ↑ financial distress (OR, 1.22; 95% CI, 1.11–1.34)</li> </ul>                                                                                                                                                                                                                                                                                                                                                                                                                                                                                                                                                                            |
| Kale & Carroll, 2016 <sup>28</sup><br>• P, I     | Adjusted linear regression<br>• Financial burden                                               | <ul style="list-style-type: none"> <li>• Patients with ↑ financial burden had ↓ QoL based on Short-Form Health Survey</li> <li>• Physical component score: ↓ score (β, -2.45; 95% CI, -3.75 to -1.15)</li> <li>• Mental component score: ↓ score (β, -3.05; 95% CI, -4.42 to -1.67)</li> <li>• Depressed mood: ↑ depression (OR, 1.95; 95% CI, 1.29–2.95)</li> <li>• Cancer recurrence—related worries: ↑ worries (OR, 3.54; 95% CI, 2.65–4.72)</li> </ul>                                                                                                                                                                                                                                                               |
| Keim-Malpass et al, 2016 <sup>29</sup><br>• P    | Adjusted linear regression<br>• Financial worry (work responsibilities)                        | <ul style="list-style-type: none"> <li>• QoL based on FACT-B</li> <li>• ↑ ability to keep up with work responsibilities was associated with ↑ QoL scores (estimate, 6.70; SE, 1.26; P&lt;.001)</li> <li>• ↑ financial worries were associated with ↓ QoL scores (estimate = -5.33; SE, 0.83; P&lt;.001)</li> <li>• Difficulty paying for basics was associated with ↓ QoL (estimate = -7.01; SE, 2.83; P=.01)</li> </ul>                                                                                                                                                                                                                                                                                                 |
| Lathan et al, 2016 <sup>30</sup><br>• I          | Adjusted ordinal logistic regression<br>• Financial reserve                                    | <ul style="list-style-type: none"> <li>• Symptom burden based on EORTC C30, pain based on Brief Pain Inventory, QoL based on EuroQoL-5 dimension scale for patients with lung cancer and CRC</li> <li>• Symptom burden: patients with ↓ financial reserves (&lt;12 mo) reported ↑ symptom burden (lung cancer: AMD, 5.25; 95% CI, 3.29–7.04; CRC: AMD, 5.31; 95% CI, 3.58–7.04)</li> <li>• Pain experienced: patients with ↓ financial reserves (&lt;12 mo) had ↑ pain (lung cancer: AMD, 5.03; 95% CI, 3.29–7.22; CRC: AMD, 3.45; 95% CI, 1.25–5.66)</li> <li>• QoL: patients with ↓ financial reserves (&lt;12 mo) had ↓ QoL (lung cancer: AMD, 4.70; 95% CI, 2.82–6.58; CRC: AMD, 5.22; 95% CI, 3.61–6.82)</li> </ul> |
| Meeker et al, 2016 <sup>31</sup><br>• P          | Frequency and structural equation modeling<br>• Financial distress/well-being (lnCharge scale) | <ul style="list-style-type: none"> <li>• Overall distress: 65% reported significant distress scores (≥4), 28% had high scores (8–10)</li> <li>• Emotional distress: 66% had ≥1 emotional symptom; 49% reported worry, 38% nervousness, 37% fear, 30% sadness, 29% depression, 26% loss of interest</li> <li>• Financial distress associated with overall distress with emotional distress mediating this association; a 1-unit improvement in financial well-being led to a 0.553-unit decrease in overall distress (P&lt;.001).</li> </ul>                                                                                                                                                                              |
| Delgado-Guay et al, 2015 <sup>32</sup><br>• P, I | Spearman correlation<br>• Financial distress                                                   | <ul style="list-style-type: none"> <li>• QoL based on FACT-G</li> <li>• Financial distress inversely correlated with QoL (r = -0.23; P = .0057)</li> </ul>                                                                                                                                                                                                                                                                                                                                                                                                                                                                                                                                                               |
| Zafar et al, 2015 <sup>33</sup><br>• P           | Adjusted structural equation modeling<br>• Financial distress                                  | <ul style="list-style-type: none"> <li>• QoL based on EuroQoL EQ-5D</li> <li>• ↑ financial distress was associated with ↓ QoL (adjusted β = -0.06 per burden category; P&lt;.001)</li> </ul>                                                                                                                                                                                                                                                                                                                                                                                                                                                                                                                             |
| Fenn et al, 2014 <sup>34</sup><br>• P            | Adjusted logistic regression<br>• Financial problems                                           | <ul style="list-style-type: none"> <li>• Patients reporting “a lot” vs no financial problems had more poor physical health (P&lt;.001)</li> <li>• More poor mental health (P&lt;.001)</li> <li>• Poorer satisfaction with social activities and relationships (P&lt;.001)</li> <li>• Overall QoL: Compared with patients with no financial problems, patients reporting “a lot” of financial problems had lower odds of QoL ≥ good (OR, 0.24; 95% CI, 0.14–0.40); reporting “some” financial problems: OR, 0.57; 95% CI, 0.33–0.99; reporting “a few” financial problems: OR, 0.67; 95% CI, 0.41–1.08)</li> </ul>                                                                                                        |

(continued on next page)

Abbreviations: AMD, adjusted mean difference; BSI, Brief Symptom Inventory; COST, Comprehensive Score for financial Toxicity; CRC, colorectal cancer; D, direct material burdens; FACT-B, Functional Assessment of Cancer Therapy-Breast tool; FACT-G, Functional Assessment of Cancer Therapy-General tool; HR, hazard ratio; I, indirect burdens; OOP, out of pocket; OR, odds ratio; P, psychological burdens; PHQ, Patient Health Questionnaire; QoL, quality of life; RR, risk ratio; SE, standard error.

eTable 5. Financial Toxicity Burdens and Health Outcomes (cont.)

| Reference<br>• Burden Type                   | Statistical Analysis<br>• Financial Toxicity Burden Measure                               | Dependent Variable and/or Outcome Measures<br>• Association of Financial Toxicity Burden Measure With Outcome Measure(s)                                                                                                                                                                                                                                                                                                                                                                                                                                                                                                                                                                                                                                                                                                                                                                                                                                                                                                                                                                                                                                                                       |
|----------------------------------------------|-------------------------------------------------------------------------------------------|------------------------------------------------------------------------------------------------------------------------------------------------------------------------------------------------------------------------------------------------------------------------------------------------------------------------------------------------------------------------------------------------------------------------------------------------------------------------------------------------------------------------------------------------------------------------------------------------------------------------------------------------------------------------------------------------------------------------------------------------------------------------------------------------------------------------------------------------------------------------------------------------------------------------------------------------------------------------------------------------------------------------------------------------------------------------------------------------------------------------------------------------------------------------------------------------|
| OoL (cont.)                                  |                                                                                           |                                                                                                                                                                                                                                                                                                                                                                                                                                                                                                                                                                                                                                                                                                                                                                                                                                                                                                                                                                                                                                                                                                                                                                                                |
| Mieneses et al, 2012 <sup>25</sup><br>• P, I | Structural equation modeling analyses<br>• Economic events                                | <ul style="list-style-type: none"> <li>• QoL: ↑ in economic events significantly associated with poorer OoL at all time points (baseline, 3-mo, and 6-mo follow-up)</li> <li>• At 6-mo time point, proportion of survivors reporting change in motivation (<math>P=.016</math>), productivity (<math>P=.002</math>), quality of work (<math>P=.01</math>), days missed from work (<math>P&lt;.001</math>) and sacrificing other things (<math>P=.001</math>) as various domains of QoL declined compared with baseline.</li> </ul>                                                                                                                                                                                                                                                                                                                                                                                                                                                                                                                                                                                                                                                             |
| Khara et al, 2011 <sup>19</sup><br>• P, I    | Adjusted logistic regression<br>• Cost concerns                                           | <ul style="list-style-type: none"> <li>• Physical and mental functioning</li> <li>• ↑ Concerns about medical costs associated with ↓ physical (OR, 2.68; 95% CI, 2.03–3.53) and mental functioning (OR, 2.32; 95% CI, 1.65–3.27)</li> </ul>                                                                                                                                                                                                                                                                                                                                                                                                                                                                                                                                                                                                                                                                                                                                                                                                                                                                                                                                                    |
| de Moor et al, 2010 <sup>35</sup><br>• P     | Analysis of variance; adjusted linear regression<br>• Financial status                    | <ul style="list-style-type: none"> <li>• Women with better self-rated financial status experienced decline in depression and anxiety over time while women with medium or low financial status experienced increase in both over time</li> <li>• Depression at 9-mo follow-up; ↑ financial status associated with ↓ depression (<math>F\text{-test}=9.84</math>; <math>df=2,349</math>; <math>P=.0001</math>)</li> <li>• Anxiety at 9-mo follow-up; ↑ financial status associated with ↓ anxiety (<math>F\text{-test}=10.17</math>; <math>df=2,346</math>; <math>P=.0001</math>)</li> </ul>                                                                                                                                                                                                                                                                                                                                                                                                                                                                                                                                                                                                    |
| Ell et al, 2008 <sup>37</sup><br>• P, I      | Adjusted generalized estimating equations modeling<br>• Cost concerns/worry of lost wages | <ul style="list-style-type: none"> <li>• OoL measured using FACT-G, PHQ, and BSI</li> <li>• Functional well-being OoL: patients with medical cost concerns or worries of wages lost at baseline and financial stress at 12 mo time point had poorer functional well-being</li> <li>• Emotional well-being OoL: patients with medical cost concerns or worries of wages lost at baseline and financial stress at 12 mo time point had poorer emotional well-being</li> <li>• Physical well-being OoL: patients with medical cost concerns at baseline and financial stress at 12 mo time point had poorer physical well-being</li> <li>• Social-family well-being OoL: patients with wage worries at baseline and financial stress at 12 mo time point had poorer social-family well-being</li> <li>• Depression (PHQ-9) and anxiety (BSI-A) scales: patients with medical cost concerns or worries of wages lost had higher scores on both scales</li> <li>• Major depression (PHQ-9<math>\geq</math>10): patients with wage-related worries (OR, 2.12; 95% CI, 1.19–3.76) and financial stress (OR, 2.13; 95% CI, 1.14–3.99) more likely to meet the criteria for major depression</li> </ul> |
| Gupta et al, 2007 <sup>38</sup><br>• P       | Adjusted linear regression<br>• Financial difficulty                                      | <ul style="list-style-type: none"> <li>• QoL: 10-unit ↑ in financial difficulty score associated with ↓ in QoL score (Ferrans and Powers Quality of Life Index); Overall QoL: <math>\Delta</math> score, <math>-0.40</math>; 95% CI, <math>-0.48</math> to <math>-0.32</math>; <math>P&lt;.001</math></li> <li>• Health and physical: <math>\Delta</math> score, <math>-0.52</math>; 95% CI, <math>-0.64</math> to <math>-0.41</math>; <math>P&lt;.001</math></li> <li>• Social and economic: <math>\Delta</math> score, <math>-0.36</math>; 95% CI, <math>-0.44</math> to <math>-0.29</math>; <math>P&lt;.001</math></li> <li>• Psychological and spiritual: <math>\Delta</math> score, <math>-0.32</math>; 95% CI, <math>-0.44</math> to <math>-0.21</math>; <math>P&lt;.001</math></li> <li>• Family: <math>\Delta</math> score, <math>-0.24</math>; 95% CI, <math>-0.33</math> to <math>-0.14</math>; <math>P&lt;.001</math></li> </ul>                                                                                                                                                                                                                                                    |

Abbreviations: AMD, adjusted mean difference; BSI, Brief Symptom Inventory; COST, Comprehensive Score for financial Toxicity; CRC, colorectal cancer; D, direct material burdens; FACT-B, Functional Assessment of Cancer Therapy-Breast tool; FACT-G, Functional Assessment of Cancer Therapy-General tool; HR, hazard ratio; I, indirect burdens; OOP, out of pocket; OR, odds ratio; P, psychological burdens; PHQ, Patient Health Questionnaire; QoL, quality of life; RR, risk ratio; SE, standard error.

(references on next page)

## eTable 5. Financial Toxicity Burdens and Health Outcomes (cont.)

### References

- Farias AJ, Du XL. Association between out-of-pocket costs, race/ethnicity, and adjuvant endocrine therapy adherence among Medicare patients with breast cancer. *J Clin Oncol* 2017;35:86–95.
- Farias AJ, Hansen RN, Zeliadt SB, et al. The association between out-of-pocket costs and adherence to adjuvant endocrine therapy among newly diagnosed breast cancer patients. *Am J Clin Oncol* 2018;41:708–715.
- Bender CM, Gentry AL, Brufsky AM, et al. Influence of patient and treatment factors on adherence to adjuvant endocrine therapy in breast cancer. *Oncol Nurs Forum* 2014;41:274–285.
- Bestvina CM, Zullig LL, Rushing C, et al. Patient-oncologist cost communication, financial distress, and medication adherence. *J Oncol Pract* 2014;10:162–167.
- Dusetzina SB, Winn AN, Abel GA, et al. Cost sharing and adherence to tyrosine kinase inhibitors for patients with chronic myeloid leukemia. *J Clin Oncol* 2014;32:306–311.
- Jagsi R, Pottow JAE, Griffith KA, et al. Long-term financial burden of breast cancer: experiences of a diverse cohort of survivors identified through population-based registries. *J Clin Oncol* 2014;32:1269–1276.
- Zafar SY, Peppercorn JM, Schrag D, et al. The financial toxicity of cancer treatment: a pilot study assessing out-of-pocket expenses and the insured cancer patient's experience. *Oncologist* 2013;18:381–390.
- Zullig LL, Peppercorn JM, Schrag D, et al. Financial distress, use of cost-coping strategies, and adherence to prescription medication among patients with cancer. *J Oncol Pract* 2013;9(Suppl 6):60s–63s.
- Shankaran V, Jolly S, Blough D, et al. Risk factors for financial hardship in patients receiving adjuvant chemotherapy for colon cancer: a population-based exploratory analysis. *J Clin Oncol* 2012;30:1608–1614.
- Neugut AI, Subar M, Wilde ET, et al. Association between prescription co-payment amount and compliance with adjuvant hormonal therapy in women with early-stage breast cancer. *J Clin Oncol* 2011;29:2534–2542.
- Streeter SB, Schwartzberg L, Husain N, et al. Patient and plan characteristics affecting abandonment of oral oncolytic prescriptions. *Am J Manag Care* 2011;17(Suppl 5):SP38–44.
- Markman M, Luce R. Impact of the cost of cancer treatment: an internet-based survey. *J Oncol Pract* 2010;6:69–73.
- Pezzin LE, O'Neil MB, Nattinger AB. The economic consequences of breast cancer adjuvant hormonal treatments. *J Gen Intern Med* 2009;24(Suppl 2):S446–450.
- Huntington SF, Weiss BM, Vogl DT, et al. Financial toxicity in insured patients with multiple myeloma: a cross-sectional pilot study. *Lancet Haematol* 2015;2:e408–416.
- Nijp RD, Zullig LL, Samsa G, et al. Identifying cancer patients who alter care or lifestyle due to treatment-related financial distress. *Psychooncology* 2016;25:719–725.
- Guy GP Jr, Yabroff KR, Ekwueme DU, et al. Healthcare expenditure burden among non-elderly cancer survivors, 2008–2012. *Am J Prev Med* 2015;49(Suppl 5):S489–497.
- Khera N, Chang YH, Hashmi S, et al. Financial burden in recipients of allogeneic hematopoietic cell transplantation. *Biol Blood Marrow Transplant* 2014;20:1375–1381.
- Kent EE, Forsythe LP, Yabroff KR, et al. Are survivors who report cancer-related problems more likely to forgo or delay medical care? *Cancer* 2013;119:3710–3717.
- Khera N, Chow EJ, Leisenring WM, et al. Factors associated with adherence to preventive care practices among hematopoietic cell transplantation survivors. *Biol Blood Marrow Transplant* 2011;17:995–1003.
- Weaver KE, Rowland JH, Bellizzi KM, et al. Forgoing medical care because of cost: assessing disparities in healthcare access among cancer survivors living in the United States. *Cancer* 2010;116:3493–3504.
- DiMartino LD, Birken SA, Mayer DK. The relationship between cancer survivors' socioeconomic status and reports of follow-up care discussions with providers. *J Cancer Educ* 2017;32:749–755.
- Wong YN, Schluchter MD, Albrecht TL, et al. Financial concerns about participation in clinical trials among patients with cancer. *J Clin Oncol* 2016;34:479–487.
- Ramsey SD, Bansal A, Fedorenko CR, et al. Financial insolvency as a risk factor for early mortality among patients with cancer. *J Clin Oncol* 2016;34:980–986.
- de Souza JA, Yap BJ, Wroblewski K, et al. Measuring financial toxicity as a clinically relevant patient-reported outcome: the validation of the Comprehensive Score for financial Toxicity (COST). *Cancer* 2017;123:476–484.
- Abel GA, Albelda R, Khera N, et al. Financial hardship and patient-reported outcomes after hematopoietic cell transplantation. *Biol Blood Marrow Transplant* 2016;22:1504–1510.
- Chongpison Y, Hombrook MC, Harris RB, et al. Self-reported depression and perceived financial burden among long-term rectal cancer survivors. *Psychooncology* 2016;25:1350–1356.
- Delgado-Guay MO, Chisholm G, Williams J, et al. Frequency, intensity, and correlates of spiritual pain in advanced cancer patients assessed in a supportive/palliative care clinic. *Palliat Support Care* 2016;14:341–348.
- Kale HP, Carroll NV. Self-reported financial burden of cancer care and its effect on physical and mental health-related quality of life among US cancer survivors. *Cancer* 2016;122:283–289.
- Keim-Malpass J, Levine B, Danhauer SC, et al. Work-related perceptions and quality of life among breast cancer survivors. *Psychooncology* 2016;25:873–876.
- Lathan CS, Cronin A, Tucker-Seeley R, et al. Association of financial strain with symptom burden and quality of life for patients with lung or colorectal cancer. *J Clin Oncol* 2016;34:1732–1740.
- Meeker CR, Geynisman DM, Eggleston BL, et al. Relationships among financial distress, emotional distress, and overall distress in insured patients with cancer. *J Oncol Pract* 2016;12:e755–764.
- Delgado-Guay M, Ferrer J, Rieber AG, et al. Financial distress and its associations with physical and emotional symptoms and quality of life among advanced cancer patients. *Oncologist* 2015;20:1092–1098.
- Zafar SY, McNeil RB, Thomas CM, et al. Population-based assessment of cancer survivors' financial burden and quality of life: a prospective cohort study. *J Oncol Pract* 2015;11:145–150.
- Fenn KM, Evans SB, McCorkle R, et al. Impact of financial burden of cancer on survivors' quality of life. *J Oncol Pract* 2014;10:332–338.
- Meneses K, Azuero A, Hassey L, et al. Does economic burden influence quality of life in breast cancer survivors? *Gynecol Oncol* 2012;124:437–443.
- de Moor JS, Partridge AH, Winer EP, et al. The role of socioeconomic status in adjustment after ductal carcinoma in situ. *Cancer* 2010;116:1218–1225.
- Ell K, Xie B, Wells A, et al. Economic stress among low-income women with cancer: effects on quality of life. *Cancer* 2008;112:616–625.
- Gupta D, Lis CG, Grutsch JF. Perceived cancer-related financial difficulty: implications for patient satisfaction with quality of life in advanced cancer. *Support Care Cancer* 2007;15:1051–1056.

## eAppendix 1. Supplementary Results

### Study Characteristics

Patients with cancer at any disease site (eg, breast, prostate, lung) were eligible in 38 studies (51%). Single-disease site-specific studies most commonly focused on breast cancer (n=14 studies, representing 46,033 study subjects) and hematologic cancers (n=7 studies, representing 7,005 study subjects). Assessments of the measure of financial toxicity represented a variety of time points across the cancer survivorship spectrum, from diagnosis to treatment to follow-up; 7 studies focused on financial toxicity within the first 12 months of cancer treatment,<sup>1-7</sup> and 6 studies were longitudinal in design.<sup>8-13</sup> A total of 5 studies (74%) were cross-sectional in design; 3 studies (4%) focused on subjects aged  $\geq 65$  years,<sup>14-16</sup> and 7 studies oversampled for racial/ethnic minorities or medically underserved patients.<sup>4,8,17-21</sup> For sample-weighted prevalence estimates, subgroup analyses demonstrating the prevalence of financial burdens ranged from 39% to 64%. When data were grouped by the specific type of financial burden, prevalence was as follows:

- In 7 studies reporting psychological burdens, 39% (95% CI, 25%–54%).
- In 13 studies reporting psychological and indirect burdens, 50% (95% CI, 39%–61%).
- In 1 study reporting indirect and direct burdens, 42% (95% CI, 39%–45%).
- In 2 studies reporting psychological, indirect, and direct burdens, 59% (95% CI, 54%–63%).
- In 1 study reporting indirect burdens, 64% (95% CI, 62%–66%).
- In 1 study reporting psychological and direct burdens, 49% (95% CI, 41%–56%).

Therefore, by type of financial burden, no substantial differences in prevalence were observed (meta-regression  $P=.24$ ).

### Risk of Bias

There was a risk of recall bias within studies, particularly for studies with cross-sectional or retrospective cohort design in which a subject's financial toxicity was not determined prospectively but instead depended on recall and self-report of financial toxicity that the subject retrospectively attributed as a consequence of cancer treatment. Therefore, temporality of associations between financial toxicity and outcomes could not be confirmed. Not all financial toxicity tools/measures had reliability and validity testing, which could lead to misclassification bias. However, some financial toxicity measures were objective (eg, out-of-pocket [OOP] costs and copays determined by insurance claims records, or bankruptcy as determined by public records and not subject self-reporting) and/or validation-related (eg, the COST tool), and themes between findings from studies using validated measures did not differ categorically from studies using other financial toxicity measures. Selection bias may have occurred with underrepresentation of nonwhite subjects in studies.

Selection bias may have also occurred if nonparticipants systematically differed from participants (eg, if nonparticipants tended to have more severe disease or financial toxicity causing barriers to participation), though in the 56 evaluable studies the participation rate exceeded 50% in 86% of studies. Of the 6 longitudinal studies, attrition bias because of deaths from metastatic or advanced cancer could have impacted the generalizability of longitudinal findings to patients with more severe disease.

### Measures of Financial Toxicity

Regarding existing measures of financial toxicity, no single concept, measure, or tool was consistently used across studies. Measures included validated items or tools (the Medical Expenditure Panel Survey<sup>22</sup> and the COST tool<sup>23</sup>), objective quantification or estimation of OOP costs, and subjective questions about the severity of treatment, financial burdens, and/or psychological stress (eg, "How much financial burden currently resulted from your illness and treatment?").<sup>24</sup>

### Additional Quantitative Analyses

Funnel plot and regression asymmetry tests to assess small-study bias were not feasible because of the small number of studies for quantitative synthesis. For the association between insurance status and odds of financial toxicity, on sensitivity analysis, greater odds were observed in patients with breast cancer aged  $>65$  years receiving adjuvant hormonal treatments. Insurance was still associated with financial toxicity when removing the studies evaluating breast cancer (odds ratio [OR], 1.77; 95% CI, 1.38–2.25;  $I^2=31\%$ ) or any other particular type of cancer (OR, 2.17; 95% CI, 1.63–2.89;  $I^2=0\%$ ). For the association between financial toxicity and odds of medication nonadherence, the association was still significant after removing the study evaluating leukemia only (OR, 2.22; 95% CI, 1.25–3.96;  $I^2=13\%$ ).

## References

- Kale HP, Carroll NV. Self-reported financial burden of cancer care and its effect on physical and mental health-related quality of life among US cancer survivors. *Cancer* 2016;122:283–289.
- Lee M, Salloum RG. Racial and ethnic disparities in cost-related medication non-adherence among cancer survivors. *J Cancer Surviv* 2016;10:534–544.
- Zafar SY, McNeil RB, Thomas CM, et al. Population-based assessment of cancer survivors' financial burden and quality of life: a prospective cohort study. *J Oncol Pract* 2015;11:145–150.
- Wong YN, Schluchter MD, Albrecht TL, et al. Financial concerns about participation in clinical trials among patients with cancer. *J Clin Oncol* 2016;34:479–487.
- Ramsey SD, Bansal A, Fedorenko CR, et al. Financial insolvency as a risk factor for early mortality among patients with cancer. *J Clin Oncol* 2016;34:980–986.
- Delgado-Guay M, Ferrer J, Rieber AG, et al. Financial distress and its associations with physical and emotional symptoms and quality of life among advanced cancer patients. *Oncologist* 2015;20:1092–1098.
- Peng L, Ye X, Zhou Y, et al. Meta-analysis of incidence and risk of peripheral neuropathy associated with intravenous bortezomib. *Support Care Cancer* 2015;23:2813–2824.
- Shankaran V, Jolly S, Blough D, et al. Risk factors for financial hardship in patients receiving adjuvant chemotherapy for colon cancer: a population-based exploratory analysis. *J Clin Oncol* 2012;30:1608–1614.
- Regenbogen SE, Veenstra CM, Hawley ST, et al. The personal financial burden of complications after colorectal cancer surgery. *Cancer* 2014;120:3074–3081.
- Goodwin JA, Coleman EA, Sullivan E, et al. Personal financial effects of multiple myeloma and its treatment. *Cancer Nurs* 2013;36:301–308.
- Meeker CR, Wong YN, Egleston BL, et al. Distress and financial distress in adults with cancer: an age-based analysis. *J Natl Compr Canc Netw* 2017;15:1224–1233.
- Zheng Z, Yabroff KR, Guy GP Jr, et al. Annual medical expenditure and productivity loss among colorectal, female breast, and prostate cancer survivors in the United States. *J Natl Cancer Inst* 2015;108:djv382.
- de Souza JA, Kung S, O'Connor J, et al. Determinants of patient-centered financial stress in patients with locally advanced head and neck cancer. *J Oncol Pract* 2017;13:e310–318.
- Banegas MP, Guy GP Jr, de Moor JS, et al. For working-age cancer survivors, medical debt and bankruptcy create financial hardships. *Health Aff (Millwood)* 2016;35:54–61.
- Martin MY, Fouad MN, Oster RA, et al. What do cancer patients worry about when making decisions about treatment? Variation across racial/ethnic groups. *Support Care Cancer* 2014;22:233–244.
- Neugut AI, Subar M, Wilde ET, et al. Association between prescription co-payment amount and compliance with adjuvant hormonal therapy in women with early-stage breast cancer. *J Clin Oncol* 2011;29:2534–2542.
- Fenn KM, Evans SB, McCorkle R, et al. Impact of financial burden of cancer on survivors' quality of life. *J Oncol Pract* 2014;10:332–338.
- Wheeler SB, Spencer JC, Pinheiro LC, et al. Financial impact of breast cancer in black versus white women. *J Clin Oncol* 2018;36:1695–1701.
- Farias AJ, Hansen RN, Zeliadt SB, et al. The association between out-of-pocket costs and adherence to adjuvant endocrine therapy among newly diagnosed breast cancer patients. *Am J Clin Oncol* 2018;41:708–715.
- Shankaran V, Leahy T, Steelquist J, et al. Pilot feasibility study of an oncology financial navigation program. *J Oncol Pract* 2018;14:e122–129.
- DiMartino LD, Birken SA, Mayer DK. The relationship between cancer survivors' socioeconomic status and reports of follow-up care discussions with providers. *J Cancer Educ* 2017;32:749–755.
- Peng L, Bu Z, Ye X, et al. Incidence and risk of peripheral neuropathy with nab-paclitaxel in patients with cancer: a meta-analysis. *Eur J Cancer Care [Br]* 2017;26:e12407.
- Chongpison Y, Hornbrook MC, Harris RB, et al. Self-reported depression and perceived financial burden among long-term rectal cancer survivors. *Psychooncology* 2016;25:1350–1356.
- Wan Y, Gao X, Mehta S, et al. Indirect costs associated with metastatic breast cancer. *J Med Econ* 2013;16:1169–1178.
